# Supplementary material for: In vivo determination of analgesic and anti-inflammatory activities of isolated compounds from Cleome amblyocarpa and molecular modelling for the top active investigated compounds
Source: Royal Society of Chemistry journal article supplement (doi:10.1039/d4ra04496g), 2024-01-01
Supplement: d4ra04496g1.pdf [file d4ra04496g1.pdf]

## ***In vivo* Determination of Analgesic and Anti-inflammatory Activities of Isolated Compounds from *Cleome amblyocarpa* and Molecular Modelling for the Top Active Investigated Compounds.**

Mayada M. El-Ayouty,<sup>a,†</sup> Nermeen A. Eltahawy,<sup>b,†</sup> Ahmed M. Abd EL-sameaa,<sup>a</sup> Ahmed M. Badawy,<sup>a</sup> Khaled M. Darwish,<sup>c</sup> Sameh S. Elhady,<sup>d,e</sup> Mostafa M. Shokr,<sup>f</sup> and Safwat A. Ahmed,<sup>\*b</sup>

<sup>a</sup> Department of Pharmacognosy, Faculty of Pharmacy, Sinai University, El-Arish 45511, Egypt; [miada.mohamed@su.edu.eg](mailto:miada.mohamed@su.edu.eg) (M.M.E.); [ahmed.abdelsameaa@su.edu.eg](mailto:ahmed.abdelsameaa@su.edu.eg) (A.M.A.); [ahmed.badawy@su.edu.eg](mailto:ahmed.badawy@su.edu.eg) (A.M.B.)

<sup>b</sup> Department of Pharmacognosy, Faculty of Pharmacy, Suez Canal University, Ismailia 41522, Egypt; [Nermeenazmy25@gmail.com](mailto:Nermeenazmy25@gmail.com) (N.A.E)

<sup>c</sup> Department of Medicinal Chemistry, Faculty of Pharmacy, Suez Canal University, Ismailia 41522, Egypt; [Khaled\\_darwish@pharm.suez.edu.eg](mailto:Khaled_darwish@pharm.suez.edu.eg) (K.M.D).

<sup>d</sup> King Abdulaziz University Herbarium, Faculty of Science, King Abdulaziz University, Jeddah 21589, Saudi Arabia; [ssahmed@kau.edu.sa](mailto:ssahmed@kau.edu.sa) (S.S.E.)

<sup>e</sup> Department of Biological Sciences, Faculty of Science, King Abdulaziz University, Jeddah 21589, Saudi Arabia

<sup>f</sup> Department of Pharmacology and Toxicology, Faculty of Pharmacy, Sinai University – Arish Branch, Arish, 45511, Egypt; [mostafa.mohsen@su.edu.eg](mailto:mostafa.mohsen@su.edu.eg) (M.M.S.)

Correspondence: [safwat\\_aa@yahoo.com](mailto:safwat_aa@yahoo.com) or [safwat\\_ahmed@pharm.suez.edu.eg](mailto:safwat_ahmed@pharm.suez.edu.eg) (S.A.A.); Tel.: +20-010-92638387; Fax: +20-064-323074

<sup>†</sup> Both authors contributed equally to this work and share first authorship.

### **List of figures: -**

|                                                                                                                                  |    |
|----------------------------------------------------------------------------------------------------------------------------------|----|
| Figure 1: LC-MS/MS of compound 1 .....                                                                                           | 15 |
| Figure 2: <sup>1</sup> H-NMR spectrum of compound 1 (300 MHz, DMSO- <i>d</i> 6) .....                                            | 16 |
| Figure 3: Partial expansion of <sup>1</sup> H-NMR spectrum of compound 1 (300 MHz, DMSO- <i>d</i> 6). .....                      | 17 |
| Figure 4: Partial expansion of <sup>1</sup> H-NMR spectrum of compound 1 (300 MHz, DMSO- <i>d</i> 6). .....                      | 18 |
| Figure 5: <sup>13</sup> C-NMR spectrum of compound 1 (75 MHz, DMSO- <i>d</i> 6) .....                                            | 19 |
| Figure 6: Partial expansion of <sup>13</sup> C-NMR spectrum of compound 1 (75 MHz, DMSO- <i>d</i> 6) .....                       | 20 |
| Figure 7: Partial expansion of <sup>13</sup> C-NMR spectrum of compound 1 (75 MHz, DMSO- <i>d</i> 6) .....                       | 21 |
| Figure 8: Partial expansion of <sup>13</sup> C-NMR spectrum of compound 1 (75 MHz, DMSO- <i>d</i> 6) .....                       | 22 |
| Figure 9: <sup>1</sup> H-NMR spectrum of compound 2 (300 MHz, DMSO- <i>d</i> 6) .....                                            | 22 |
| Figure 10: Partial expansion of <sup>1</sup> H-NMR spectrum of compound 2 (400 MHz, DMSO- <i>d</i> 6). .....                     | 24 |
| Figure 11: Partial expansion of <sup>1</sup> H-NMR spectrum of compound 2 (400 MHz, DMSO- <i>d</i> 6). .....                     | 25 |
| Figure 12: <sup>13</sup> C-NMR spectrum of compound 2 (100 MHz, DMSO- <i>d</i> 6) .....                                          | 26 |
| Figure 13: Partial expansion of <sup>13</sup> C-NMR spectrum of compound 2 (100 MHz, DMSO- <i>d</i> 6) .....                     | 27 |
| Figure 14: Partial expansion of <sup>13</sup> C-NMR spectrum of compound 2 (100 MHz, DMSO- <i>d</i> 6) .....                     | 28 |
| Figure 15: <sup>1</sup> H-NMR spectrum of compound 3 (300 MHz, CDCl <sub>3</sub> -CD <sub>3</sub> OD).....                       | 29 |
| Figure 16: Partial expansion of <sup>1</sup> H-NMR spectrum of compound 3 (300 MHz, CDCl <sub>3</sub> -CD <sub>3</sub> OD).....  | 30 |
| Figure 17: Partial expansion of <sup>1</sup> H-NMR spectrum of compound 3 (300 MHz, CDCl <sub>3</sub> -CD <sub>3</sub> OD) ..... | 31 |
| Figure 18: Partial expansion of <sup>1</sup> H-NMR spectrum of compound 3 (300 MHz, CDCl <sub>3</sub> -CD <sub>3</sub> OD) ..... | 32 |
| Figure 19: <sup>13</sup> C-NMR spectrum of compound 3 (75 MHz, CDCl <sub>3</sub> -CD <sub>3</sub> OD).....                       | 33 |

|                                                                                                                                   |    |
|-----------------------------------------------------------------------------------------------------------------------------------|----|
| Figure 20: Partial expansion of $^{13}\text{C}$ -NMR spectrum of compound 3 (75 MHz, $\text{CDCl}_3\text{-CD}_3\text{OD}$ ) ..... | 34 |
| Figure 21: Partial expansion of $^{13}\text{C}$ -NMR spectrum of compound 3 (75 MHz, $\text{CDCl}_3\text{-CD}_3\text{OD}$ ) ..... | 35 |
| Figure 22: $^1\text{H}$ -NMR spectrum of compound 4 (300 MHz, $\text{CDCl}_3$ ) .....                                             | 36 |
| Figure 23: Partial expansion of $^1\text{H}$ -NMR spectrum of compound 4 (300 MHz, $\text{CDCl}_3$ ) .....                        | 37 |
| Figure 24: Partial expansion of $^1\text{H}$ -NMR spectrum of compound 4 (300 MHz, $\text{CDCl}_3$ ) .....                        | 38 |
| Figure 25: Partial expansion of $^1\text{H}$ -NMR spectrum of compound 4 (300 MHz, $\text{CDCl}_3$ ) .....                        | 39 |
| Figure 26: $^{13}\text{C}$ -NMR spectrum of compound 4 (75 MHz, $\text{CDCl}_3$ ) .....                                           | 40 |
| Figure 27: Partial expansion of $^{13}\text{C}$ -NMR spectrum of compound 4 (75 MHz, $\text{CDCl}_3$ ) .....                      | 41 |
| Figure 28: Partial expansion of $^{13}\text{C}$ -NMR spectrum of compound 4 (75 MHz, $\text{CDCl}_3$ ) .....                      | 42 |
| Figure 29: $^1\text{H}$ -NMR spectrum of compound 5 (300 MHz, $\text{CDCl}_3\text{-CD}_3\text{OD}$ ) .....                        | 43 |
| Figure 30: Partial expansion of $^1\text{H}$ -NMR spectrum of compound 5 (300 MHz, $\text{CDCl}_3\text{-CD}_3\text{OD}$ ) .....   | 44 |
| Figure 31: Partial expansion of $^1\text{H}$ -NMR spectrum of compound 5 (300 MHz, $\text{CDCl}_3\text{-CD}_3\text{OD}$ ) .....   | 45 |
| Figure 32: $^{13}\text{C}$ -NMR spectrum of compound 5 (75 MHz, $\text{CDCl}_3\text{-CD}_3\text{OD}$ ) .....                      | 46 |
| Figure 33: EI-MS of Compound 6 .....                                                                                              | 47 |
| Figure 34: UV-Vis spectrum analysis of Compound 6 .....                                                                           | 48 |
| Figure 35: $^1\text{H}$ -NMR spectrum of compound 6 (300 MHz, $\text{CD}_3\text{OD}$ ) .....                                      | 49 |
| Figure 36: Partial expansion of $^1\text{H}$ -NMR spectrum of compound 6 (300 MHz, $\text{CD}_3\text{OD}$ ) .....                 | 50 |
| Figure 37: Partial expansion of $^1\text{H}$ -NMR spectrum of compound 6 (300 MHz, $\text{CD}_3\text{OD}$ ) .....                 | 51 |
| Figure 38: Partial expansion of $^1\text{H}$ -NMR spectrum of compound 6 (300 MHz, $\text{CD}_3\text{OD}$ ) .....                 | 52 |
| Figure 39: LC-MS/MS of compound 7 .....                                                                                           | 53 |
| Figure 40: $^1\text{H}$ -NMR spectrum of compound 7 (300 MHz, $\text{CDCl}_3$ ) .....                                             | 54 |
| Figure 41: Partial expansion of $^1\text{H}$ -NMR spectrum of compound 7 (300 MHz, $\text{CDCl}_3$ ) .....                        | 55 |
| Figure 42: Partial expansion of $^1\text{H}$ -NMR spectrum of compound 7 (300 MHz, $\text{CDCl}_3$ ) .....                        | 56 |
| Figure 43: $^{13}\text{C}$ -NMR spectrum of compound 7 (75 MHz, $\text{CDCl}_3$ ) .....                                           | 57 |
| Figure 44: Partial expansion of $^{13}\text{C}$ -NMR spectrum of compound 7 (75 MHz, $\text{CDCl}_3$ ) .....                      | 58 |
| Figure 45: Partial expansion of $^{13}\text{C}$ -NMR spectrum of compound 7 (75 MHz, $\text{CDCl}_3$ ) .....                      | 59 |
| Figure 46: LC-MS/MS of compound 8 .....                                                                                           | 60 |
| Figure 47: $^1\text{H}$ -NMR spectrum of compound 8 (300 MHz, $\text{CDCl}_3$ ) .....                                             | 61 |
| Figure 48: Partial expansion of $^1\text{H}$ -NMR spectrum of compound 8 (300 MHz, $\text{CDCl}_3$ ) .....                        | 62 |
| Figure 49: Partial expansion of $^1\text{H}$ -NMR spectrum of compound 8 (300 MHz, $\text{CDCl}_3$ ) .....                        | 63 |
| Figure 50: $^{13}\text{C}$ -NMR spectrum of compound 8 (75 MHz, $\text{CDCl}_3$ ) .....                                           | 64 |
| Figure 51: Partial expansion of $^{13}\text{C}$ -NMR spectrum of compound 8 (75 MHz, $\text{CDCl}_3$ ) .....                      | 65 |
| Figure 52: EI-MS of Compound 9 .....                                                                                              | 66 |
| Figure 53: $^1\text{H}$ -NMR spectrum of compound 9 (300 MHz, $\text{CDCl}_3$ ) .....                                             | 67 |
| Figure 54: Partial expansion of $^1\text{H}$ -NMR spectrum of compound 9 (300 MHz, $\text{CDCl}_3$ ) .....                        | 68 |
| Figure 55: $^{13}\text{C}$ -NMR spectrum of compound 9 (75 MHz, $\text{CDCl}_3$ ) .....                                           | 69 |
| Figure 56: Partial expansion of $^{13}\text{C}$ -NMR spectrum of compound 9 (75 MHz, $\text{CDCl}_3$ ) .....                      | 70 |
| Figure 57: $^1\text{H}$ -NMR spectrum of compound 10 (300 MHz, $\text{CDCl}_3$ ) .....                                            | 71 |
| Figure 58: Partial expansion of $^1\text{H}$ -NMR spectrum of compound 10 (300 MHz, $\text{CDCl}_3$ ) .....                       | 72 |
| Figure 59: Partial expansion of $^1\text{H}$ -NMR spectrum of compound 10 (300 MHz, $\text{CDCl}_3$ ) .....                       | 73 |
| Figure 60: $^{13}\text{C}$ -NMR spectrum of compound 10 (75 MHz, $\text{CDCl}_3$ ) .....                                          | 74 |
| Figure 61: Partial expansion of $^{13}\text{C}$ -NMR spectrum of compound 10 (75 MHz, $\text{CDCl}_3$ ) .....                     | 75 |

## List of tables: -

|                                                                                                                                                              |    |
|--------------------------------------------------------------------------------------------------------------------------------------------------------------|----|
| Table 1: $^1\text{H}$ -NMR (300 MHz) and $^{13}\text{C}$ -NMR (75 MHz) in DMSO- <i>d</i> <sub>6</sub> spectra data of compound (1) .....                     | 4  |
| Table 2: $^1\text{H}$ -NMR (400 MHz) and $^{13}\text{C}$ -NMR (75 MHz) in DMSO- <i>d</i> <sub>6</sub> spectra data of compound (2) ....                      | 5  |
| Table 3: $^1\text{H}$ -NMR (300 MHz) and $^{13}\text{C}$ -NMR (75 MHz) in $\text{CDCl}_3$ - $\text{CD}_3\text{OD}$ spectra data of compound (3) .....        | 6  |
| Table 4: $^1\text{H}$ -NMR (300 MHz) and $^{13}\text{C}$ -NMR (75 MHz) in $\text{CDCl}_3$ spectra data of compound (4) .....                                 | 7  |
| Table 5: Table: $^1\text{H}$ -NMR (300 MHz) and $^{13}\text{C}$ -NMR (75 MHz) in $\text{CDCl}_3$ - $\text{CD}_3\text{OD}$ spectra data of compound (5) ..... | 8  |
| Table 6: $^1\text{H}$ -NMR (300 MHz) and $^{13}\text{C}$ -NMR (75 MHz) in $\text{CD}_3\text{OD}$ spectra data of compound (6) .....                          | 9  |
| Table 7: $^1\text{H}$ -NMR (300 MHz) and $^{13}\text{C}$ -NMR (75 MHz) in $\text{CDCl}_3$ spectra data of compound (7) .....                                 | 10 |
| Table 8: $^1\text{H}$ -NMR (300 MHz) and $^{13}\text{C}$ -NMR (75 MHz) in $\text{CDCl}_3$ spectra data of compound (8) .....                                 | 11 |
| Table 9: $^1\text{H}$ -NMR (300 MHz) and $^{13}\text{C}$ -NMR (75 MHz) in $\text{CDCl}_3$ spectra data of compound (9) .....                                 | 12 |
| Table 10: $^1\text{H}$ -NMR (300 MHz) and $^{13}\text{C}$ -NMR (75 MHz) in $\text{CDCl}_3$ spectra data of compound (10) ....                                | 13 |

**Table 1:  $^1\text{H}$ -NMR (300 MHz) and  $^{13}\text{C}$ -NMR (75 MHz) in DMSO- $d_6$  spectra data of compound (1)**

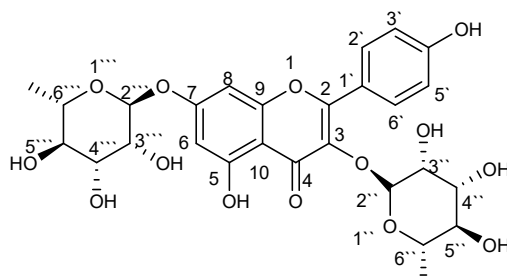

| Position | $\delta_H$ ppm (No. of H, $m$ , $J$ Hz) | $\delta_C$ (ppm)           |
|----------|-----------------------------------------|----------------------------|
| 2        | -                                       | 156.2                      |
| 3        | -                                       | 134.6                      |
| 4        | -                                       | 178.0                      |
| 5        | -                                       | 161.0                      |
| 6        | 6.44 (1H, $d$ , $J= 2.3$ Hz)            | 98.5                       |
| 7        | -                                       | 161.8                      |
| 8        | 6.76 (1H, $d$ , $J= 2.2$ Hz)            | 94.7                       |
| 9        | -                                       | 157.9                      |
| 10       | -                                       | 105.9                      |
| 1'       | -                                       | 120.4                      |
| 2',6'    | 7.78 (2H, $d$ , $J= 8.7$ Hz)            | 130.8                      |
| 3',5'    | 6.93 (2H, $d$ , $J= 8.7$ Hz)            | 115.6                      |
| 4'       | -                                       | 160.3                      |
| 1''      | 5.29 (1H, $d$ , $J= 1.2$ Hz)            | 102.0                      |
| 2''      | 3.15: 5.13 (8H, $m$ )                   | 70.4                       |
| 3''      |                                         | 70.8                       |
| 4''      |                                         | 71.7                       |
| 5''      |                                         | 70.2                       |
| 6''      |                                         | 0.81 (3H, $d$ , $J= 6$ Hz) |
| 1'''     | 5.54 (1H, $d$ , $J= 1.2$ Hz)            | 99.6                       |
| 2'''     | 3.15: 5.13 (8H, $m$ )                   | 70.3                       |
| 3'''     |                                         | 70.4                       |
| 4'''     |                                         | 71.2                       |
| 5'''     |                                         | 69.9                       |
| 6'''     |                                         | 1.13 (3H, $d$ , $J= 6$ Hz) |

**Table 2:  $^1\text{H}$ -NMR (400 MHz) and  $^{13}\text{C}$ -NMR (75 MHz) in  $\text{DMSO-}d_6$  spectra data of compound (2)**

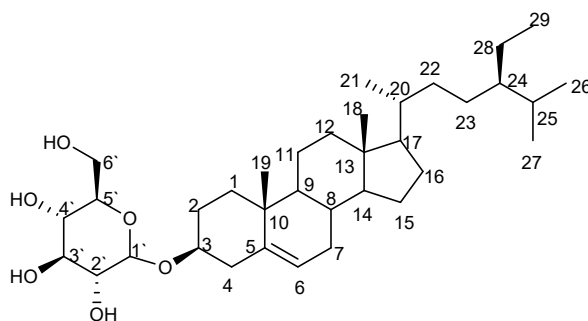

| Position | $\delta_H$ ppm (No. of H, <i>m</i> , <i>J</i> Hz) | $\delta_C$ (ppm) | Position | $\delta_H$ ppm (No. of H, <i>m</i> , <i>J</i> Hz) | $\delta_C$ (ppm) |
|----------|---------------------------------------------------|------------------|----------|---------------------------------------------------|------------------|
| 1        |                                                   | 36.7             | 19       | 1.02 (3H, <i>s</i> )                              | 19.6             |
| 2        |                                                   | 29.7             | 20       |                                                   | 36.0             |
| 3        | 3.50 (1H, <i>m</i> )                              | 77.2             | 21       | 0.96 (3H, <i>d</i> , <i>J</i> =6.3 Hz)            | 19.1             |
| 4        |                                                   | 38.8             | 22       |                                                   | 33.8             |
| 5        |                                                   | 140.9            | 23       |                                                   | 25.9             |
| 6        | 5.38 (1H, <i>m</i> )                              | 121.6            | 24       |                                                   | 45.6             |
| 7        |                                                   | 31.9             | 25       |                                                   | 29.2             |
| 8        |                                                   | 31.8             | 26       | 0.90 (3H, <i>d</i> , <i>J</i> =6.6 Hz)            | 20.2             |
| 9        |                                                   | 50.1             | 27       | 0.86 (3H, <i>d</i> , <i>J</i> =6.6 Hz)            | 19.4             |
| 10       |                                                   | 36.7             | 28       |                                                   | 23.1             |
| 11       |                                                   | 21.1             | 29       | 0.86 (3H, <i>t</i> , <i>J</i> =7 Hz)              | 12.2             |
| 12       |                                                   | 37.3             | 1'       | 4.28 (1H, <i>d</i> , <i>J</i> =7.8)               | 101.3            |
| 13       |                                                   | 42.3             | 2'       | 3.13 -3.48 (4H, <i>m</i> )                        | 73.9             |
| 14       |                                                   | 56.7             | 3'       |                                                   | 77.4             |

|    |                      |      |    |                                                                       |      |
|----|----------------------|------|----|-----------------------------------------------------------------------|------|
| 15 |                      | 24.3 | 4' |                                                                       | 70.5 |
| 16 |                      | 28.3 | 5' |                                                                       | 77.2 |
| 17 |                      | 55.9 | 6' | 3.63 (1Ha, <i>dd</i> , $J=10.4$ ,<br>5.2Hz)<br>3.18 (1Hb, <i>m</i> ), | 61.5 |
| 18 | 0.71 (3H, <i>s</i> ) | 12.1 |    |                                                                       |      |

**Table 3:**  $^1\text{H-NMR}$  (300 MHz) and  $^{13}\text{C-NMR}$  (75 MHz) in  $\text{CDCl}_3\text{-CD}_3\text{OD}$  spectra data of compound (3)

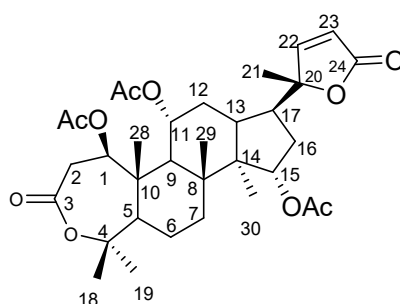

| Position    | $\delta_{\text{H}}$ ppm (No. of H, <i>m</i> , <i>J</i> Hz) |                      | $\delta_{\text{C}}$ (ppm) |
|-------------|------------------------------------------------------------|----------------------|---------------------------|
| 1           | 5.17 (1H, <i>br d</i> , $J=5$ Hz)                          |                      | 80.4                      |
| 2           | 2 a                                                        | 3.21 (1H, <i>m</i> ) | 37.9                      |
|             | 2 b                                                        | 3.09 (1H, <i>m</i> ) |                           |
| 3           |                                                            |                      | 174.9                     |
| 4           | -                                                          |                      | 86.6                      |
| 5           | 1.97 (1H, <i>m</i> )                                       |                      | 53.9                      |
| 6           | 6 a                                                        | 1.76 (1H, <i>m</i> ) | 24.4                      |
|             | 6 b                                                        | 1.41 (1H, <i>m</i> ) |                           |
| 7           | 7 a                                                        | 1.25 (1H, <i>m</i> ) | 35.7                      |
|             | 7 b                                                        | 1.66 (1H, <i>m</i> ) |                           |
| 8           | -                                                          |                      | 51.8                      |
| 9           | 1.94 (1H, <i>m</i> )                                       |                      | 52.1                      |
| 10          | -                                                          |                      | 45.0                      |
| 11          | 5.10 (1H, <i>m</i> )                                       |                      | 73.6                      |
| 12 overlaps | 12 a                                                       | 1.48 (1H, <i>m</i> ) | 34.7                      |
|             | 12 b                                                       | 1.90 (1H, <i>m</i> ) |                           |
| 13          | 1.77 (1H, <i>m</i> )                                       |                      | 40.9                      |
| 14          | -                                                          |                      | 43.2                      |
| 15          | 4.93 (1H, <i>m</i> )                                       |                      | 74.8                      |
| 16          | 16 a                                                       | 1.70 (1H, <i>m</i> ) | 33.4                      |
|             | 16 b                                                       | 2.06 (1H, <i>m</i> ) |                           |

|                             |                                       |       |
|-----------------------------|---------------------------------------|-------|
| 17                          | 2.18 (1H, <i>m</i> )                  | 45.5  |
| 18                          | 1.36 (3H, <i>s</i> )                  | 27.3  |
| 19                          | 1.43 (3H, <i>s</i> )                  | 30.9  |
| 20                          | -                                     | 92.8  |
| 21                          | 1.40 (3H, <i>s</i> )                  | 24.4  |
| 22                          | 7.71 (1H, <i>d</i> , <i>J</i> = 6 Hz) | 161.1 |
| 23                          | 6.14 (1H, <i>d</i> , <i>J</i> = 6 Hz) | 122.5 |
| 24                          | -                                     | 174.2 |
| 25                          | -                                     | -     |
| 26                          | -                                     | -     |
| 27                          | -                                     | -     |
| 28                          | 1.18 (3H, <i>s</i> )                  | 15.5  |
| 29                          | 1.17 (3H, <i>s</i> )                  | 18.0  |
| 30                          | 1.16 (3H, <i>s</i> )                  | 11.2  |
| <u>COCH3 1</u>              | -                                     | 172.0 |
| <u>COCH3 1<sup>a</sup></u>  | 1.97 (3H, <i>s</i> )                  | 21.9  |
| <u>COCH3 11</u>             | -                                     | 172.3 |
| <u>COCH3 11<sup>a</sup></u> | 1.93 (3H, <i>s</i> )                  | 22.2  |
| <u>COCH3 15</u>             | -                                     | 172.4 |
| <u>COCH3 15<sup>a</sup></u> | 2.00 (3H, <i>s</i> )                  | 22.3  |

**Table 4: <sup>1</sup>H-NMR (300 MHz) and <sup>13</sup>C-NMR (75 MHz) in CDCl<sub>3</sub> spectra data of compound (4)**

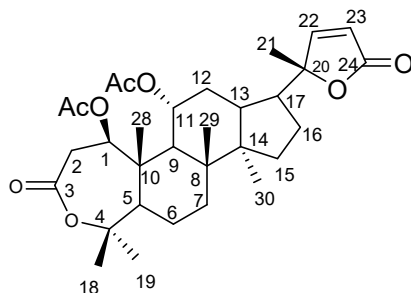

| Position | $\delta_H$ ppm (No. of H, <i>m</i> , <i>J</i> Hz) |                                                | $\delta_C$ (ppm) |
|----------|---------------------------------------------------|------------------------------------------------|------------------|
| 1        | 5.17 (1H, <i>d</i> , <i>J</i> =5.9 Hz)            |                                                | 72.6             |
| 2        | 2 a                                               | 3.18 (1H, <i>dd</i> , <i>J</i> = 15.6, 5.4 Hz) | 36.9             |
|          | 2 b                                               | 2.91 (1H, <i>br d</i> , <i>J</i> = 15.9 Hz)    |                  |
| 3        | -                                                 |                                                | 172.1            |
| 4        | -                                                 |                                                | 84.5             |
| 5        |                                                   |                                                | 41.8             |
| 6        |                                                   |                                                | 23.4             |

|                             |                                         |       |
|-----------------------------|-----------------------------------------|-------|
| 7                           |                                         | 30.4  |
| 8                           | -                                       | 41.4  |
| 9                           |                                         | 46.4  |
| 10                          | -                                       | 43.8  |
| 11                          | 5.16 (1H, <i>m</i> )                    | 78.7  |
| 12                          |                                         | 34.3  |
| 13                          |                                         | 51.0  |
| 14                          | -                                       | 50.0  |
| 15                          |                                         | 34.7  |
| 16                          |                                         | 28.9  |
| 17                          |                                         | 53.4  |
| 18                          | 0.92 (3H, <i>s</i> )                    | 14.3  |
| 19                          | 1.11 (3H, <i>s</i> )                    | 15.6  |
| 20                          | -                                       | 91.1  |
| 21                          | 1.21 (3H, <i>s</i> )                    | 17.0  |
| 22                          | 7.34 (1H, <i>d</i> , <i>J</i> = 5.6 Hz) | 159.4 |
| 23                          | 6.05 (1H, <i>d</i> , <i>J</i> = 5.6 Hz) | 121.0 |
| 24                          | -                                       | 172.2 |
| 25                          | -                                       | -     |
| 26                          | -                                       | -     |
| 27                          | -                                       | -     |
| 28                          | 1.46 (3H, <i>s</i> )                    | 30.2  |
| 29                          | 1.41 (3H, <i>s</i> )                    | 26.5  |
| 30                          | 1.43 (3H, <i>s</i> )                    | 23.1  |
| <u>COCH3 1</u>              | -                                       | 170.6 |
| <u>COCH3 1<sup>a</sup></u>  | 2.00 (3H, <i>s</i> )                    | 21.6  |
| <u>COCH3 11</u>             | -                                       | 170.4 |
| <u>COCH3 11<sup>a</sup></u> | 1.94 (3H, <i>s</i> )                    | 21.5  |

**Table 5: Table: <sup>1</sup>H-NMR (300 MHz) and <sup>13</sup>C-NMR (75 MHz) in CDCl<sub>3</sub>-CD<sub>3</sub>OD spectra data of compound (5)**

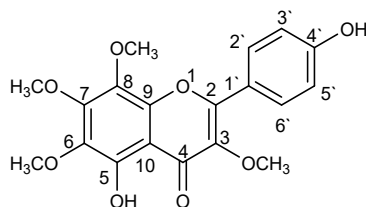

| Position | $\delta_H$ ppm (No. of H, <i>m</i> , <i>J</i> Hz) | $\delta_C$ (ppm) |
|----------|---------------------------------------------------|------------------|
| 2        | -                                                 | 156.8            |
| 3        | 3.80(3H, <i>s</i> )                               | 137.7            |



|                        |                                       |       |
|------------------------|---------------------------------------|-------|
| 4                      | -                                     | 178.8 |
| 5                      | -                                     | 148.1 |
| 6                      | 3.90 (3H, <i>s</i> )                  | 135.4 |
| 7                      | 4.08 (3H, <i>s</i> )                  | 152.3 |
| 8                      | 3.94 (3H, <i>s</i> )                  | 132.5 |
| 9                      | -                                     | 144.6 |
| 10                     | -                                     | 106.8 |
| 1'                     | -                                     | 120.7 |
| 2',6'                  | 8.05 (2H, <i>d</i> , <i>J</i> = 9 Hz) | 129.9 |
| 3',5'                  | 6.94 (2H, <i>d</i> , <i>J</i> = 9 Hz) | 115.2 |
| 4'                     | -                                     | 159.9 |
| (7-OCH <sub>3</sub> )  | -                                     | 61.5  |
| (8- OCH <sub>3</sub> ) | -                                     | 61.0  |
| (6- OCH <sub>3</sub> ) | -                                     | 60.5  |
| (3- OCH <sub>3</sub> ) | -                                     | 59.3  |

**Table 6: <sup>1</sup>H-NMR (300 MHz) and <sup>13</sup>C-NMR (75 MHz) in CD<sub>3</sub>OD spectra data of compound (6)**

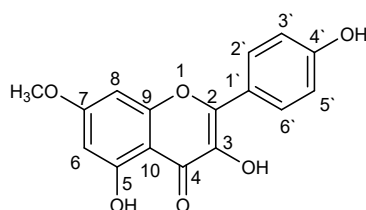

| Position | $\delta_H$ ppm ( No. of H, <i>m</i> , <i>J</i> Hz) |
|----------|----------------------------------------------------|
| 2        | -                                                  |
| 3        | 3.77(3H, <i>s</i> )                                |
| 4        | -                                                  |
| 5        | -                                                  |
| 6        | 6.21(1H, <i>d</i> , <i>J</i> = 2.1 Hz)             |
| 7        | -                                                  |
| 8        | 6.42(1H, <i>d</i> , <i>J</i> = 1.8 Hz)             |
| 9        | -                                                  |
| 10       | -                                                  |
| 1'       | -                                                  |
| 2',6'    | 7.97(2H, <i>d</i> , <i>J</i> = 9 Hz)               |
| 3',5'    | 6.94(2H, <i>d</i> , <i>J</i> = 9 Hz)               |
| 4'       | -                                                  |

**Table 7: <sup>1</sup>H-NMR (300 MHz) and <sup>13</sup>C-NMR (75 MHz) in CDCl<sub>3</sub> spectra data of compound (7)**

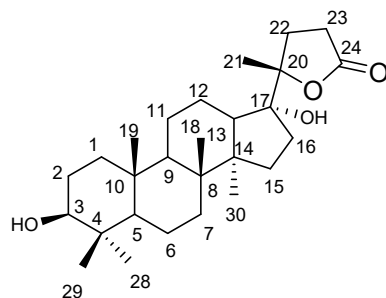

| Position | $\delta_H$ ppm (No. of H, <i>m</i> , <i>J</i> Hz) | $\delta_C$ (ppm) |
|----------|---------------------------------------------------|------------------|
| 1        | -                                                 | 33.6             |
| 2        | -                                                 | 25.3             |
| 3        | 3.40 (1H, <i>b t</i> , <i>J</i> =2.9Hz)           | 76.2             |
| 4        | -                                                 | 37.2             |
| 5        | -                                                 | 49.4             |
| 6        | -                                                 | 18.2             |
| 7        | -                                                 | 34.5             |
| 8        | -                                                 | 41.1             |
| 9        | -                                                 | 50.4             |
| 10       | -                                                 | 37.6             |
| 11       | -                                                 | 21.3             |
| 12       | -                                                 | 22.8             |
| 13       | -                                                 | 45.9             |
| 14       | -                                                 | 49.9             |
| 15       | -                                                 | 32.5             |
| 16       | -                                                 | 36.2             |
| 17       | -                                                 | 83.4             |
| 18       | 0.85 (3H, <i>s</i> )                              | 16.1             |
| 19       | 0.87 (3H, <i>s</i> )                              | 15.7             |
| 20       | -                                                 | 92.9             |
| 21       | 1.44 (3H, <i>s</i> )                              | 22.9             |
| 22       | -                                                 | 29.2             |
| 23       | 2.54-2.72 (2H, <i>m</i> )                         | 29.2             |
| 24       | -                                                 | 176.7            |
| 25       | -                                                 | -                |
| 26       | -                                                 | -                |
| 27       | -                                                 | -                |

|    |                      |      |
|----|----------------------|------|
| 28 | 0.97 (3H, <i>s</i> ) | 28.3 |
| 29 | 1.17 (3H, <i>s</i> ) | 22.1 |
| 30 | 0.95 (3H, <i>s</i> ) | 17.0 |

**Table 8: <sup>1</sup>H-NMR (300 MHz) and <sup>13</sup>C-NMR (75 MHz) in CDCl<sub>3</sub> spectra data of compound (8)**

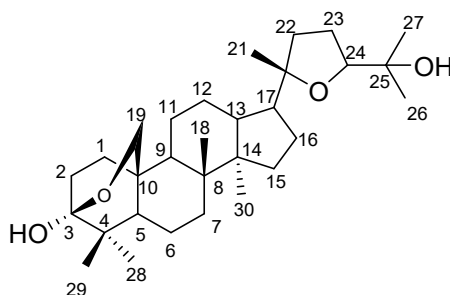

| Position | $\delta_H$ ppm (No. of H, <i>m</i> , <i>J</i> Hz) |                                            | $\delta_C$ (ppm) |
|----------|---------------------------------------------------|--------------------------------------------|------------------|
| 1        |                                                   |                                            | 36.0             |
| 2        |                                                   |                                            | 29.4             |
| 3        |                                                   |                                            | 98.2             |
| 4        |                                                   |                                            | 40.4             |
| 5        |                                                   |                                            | 49.4             |
| 6        |                                                   |                                            | 19.7             |
| 7        |                                                   |                                            | 33.3             |
| 8        |                                                   |                                            | 39.2             |
| 9        |                                                   |                                            | 45.2             |
| 10       |                                                   |                                            | 35.4             |
| 11       |                                                   |                                            | 22.6             |
| 12       |                                                   |                                            | 27.3             |
| 13       |                                                   |                                            | 43.1             |
| 14       |                                                   |                                            | 49.5             |
| 15       |                                                   |                                            | 31.3             |
| 16       |                                                   |                                            | 25.5             |
| 17       |                                                   |                                            | 49.9             |
| 18       | 0.83 (3H, <i>s</i> )                              |                                            | 15.1             |
| 19       | 19a                                               | 4.22 (1H, <i>dd</i> , <i>J</i> =8.8 Hz)    | 68.0             |
|          | 19b                                               | 3.71 (1H, <i>br d</i> , <i>J</i> = 8.1 Hz) |                  |
| 20       |                                                   |                                            | 86.3             |
| 21       | 1.19 (3H, <i>s</i> )                              |                                            | 23.2             |
| 22       |                                                   |                                            | 35.5             |
| 23       |                                                   |                                            | 26.2             |
| 24       | 3.70 (1H, <i>m</i> )                              |                                            | 83.2             |
| 25       |                                                   |                                            | 71.5             |

|    |                      |      |
|----|----------------------|------|
| 26 | 1.11 (6H, <i>s</i> ) | 26.7 |
| 27 | Overlapped           | 24.3 |
| 28 | 1.01 (3H, <i>s</i> ) | 27.3 |
| 29 | 0.97 (3H, <i>s</i> ) | 18.4 |
| 30 | 0.87 (3H, <i>s</i> ) | 15.9 |

**Table 9: <sup>1</sup>H-NMR (300 MHz) and <sup>13</sup>C-NMR (75 MHz) in CDCl<sub>3</sub> spectra data of compound (9)**

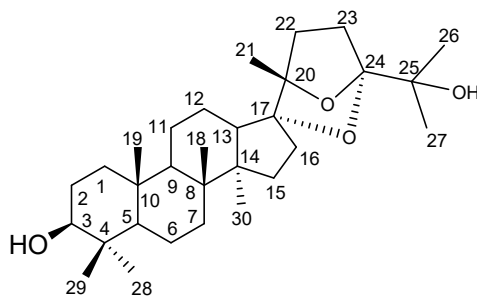

| Position | $\delta_H$ ppm (No. of H, <i>m</i> , <i>J</i> Hz) |                      | $\delta_C$ (ppm) |
|----------|---------------------------------------------------|----------------------|------------------|
| 1        | 1a                                                | 1.87 (1H, <i>m</i> ) | 33.6             |
|          | 1b                                                | 1.32 (1H, <i>m</i> ) |                  |
| 2        | 2a                                                | 1.92 (1H, <i>m</i> ) | 25.3             |
|          | 2b                                                | 1.89 (1H, <i>m</i> ) |                  |
| 3        | 3.48 (1H, <i>br s</i> )                           |                      | 76.2             |
| 4        | -                                                 |                      | 37.2             |
| 5        | 1.85 (1H, <i>m</i> )                              |                      | 49.5             |
| 6        | 1.67-1.42 (2H, <i>m</i> )                         |                      | 18.2             |
| 7        | 7a                                                | 1.24 (1H, <i>m</i> ) | 34.6             |
|          | 7b                                                | 1.22 (1H, <i>m</i> ) |                  |
| 8        | -                                                 |                      | 40.6             |
| 9        | 1.70 (1H, <i>m</i> )                              |                      | 50.8             |
| 10       | -                                                 |                      | 37.6             |
| 11       | 11a                                               | 1.72 (1H, <i>m</i> ) | 21.5             |
|          | 11b                                               | 1.26 (1H, <i>m</i> ) |                  |
| 12       | 1.67-1.42 (2H, <i>m</i> )                         |                      | 23.7             |
| 13       | 1.36 (1H, <i>m</i> )                              |                      | 44.3             |
| 14       | -                                                 |                      | 49.6             |
| 15       | 15a                                               | 1.20 (1H, <i>m</i> ) | 31.8             |
|          | 15b                                               | 1.11 (1H, <i>m</i> ) |                  |
| 16       | 16a                                               | 2.04 (1H, <i>m</i> ) | 37.7             |
|          | 16b                                               | 1.70 (1H, <i>m</i> ) |                  |
| 17       | -                                                 |                      | 89.3             |
| 18       | 0.95 (3H, <i>s</i> )                              |                      | 15.5             |
| 19       | 0.88 (3H, <i>s</i> )                              |                      | 16.2             |
| 20       | -                                                 |                      | 91.3             |
| 21       | 1.27 (3H, <i>s</i> )                              |                      | 16.2             |
| 22       | 22a                                               | 1.97 (1H, <i>m</i> ) | 32.1             |

|    |     |                      |       |
|----|-----|----------------------|-------|
|    | 22b | 1.35 (1H, <i>m</i> ) |       |
| 23 | 23a | 2.14 (1H, <i>m</i> ) | 31.9  |
|    | 23b | 1.90 (1H, <i>m</i> ) |       |
| 24 |     | -                    | 112.6 |
| 25 |     | -                    | 70.3  |
| 26 |     | 1.41 (3H, <i>s</i> ) | 25.5  |
| 27 |     | 1.29 (3H, <i>s</i> ) | 24.0  |
| 28 |     | 1.03 (3H, <i>s</i> ) | 28.3  |
| 29 |     | 0.85 (3H, <i>s</i> ) | 22.0  |
| 30 |     | 0.95 (3H, <i>s</i> ) | 18.1  |

**Table 10:  $^1\text{H}$ -NMR (300 MHz) and  $^{13}\text{C}$ -NMR (75 MHz) in  $\text{CDCl}_3$  spectra data of compound (10)**

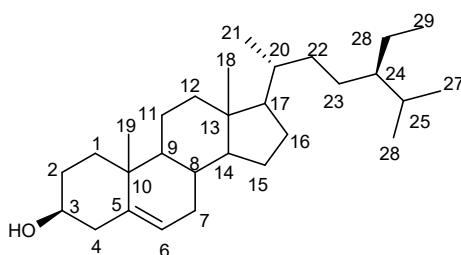

| Position | $\delta\text{H}$ ppm (No. of H, <i>m</i> , <i>J</i> Hz) | $\delta\text{C}$ (ppm) |
|----------|---------------------------------------------------------|------------------------|
| 1        | -                                                       | 37.2                   |
| 2        | -                                                       | 29.7                   |
| 3        | 3.51 (1H, <i>m</i> )                                    | 71.8                   |
| 4        | -                                                       | 42.3                   |
| 5        | -                                                       | 140.7                  |
| 6        | 5.35 (1H, <i>m</i> )                                    | 121.7                  |
| 7        |                                                         | 31.9                   |
| 8        |                                                         | 31.6                   |
| 9        |                                                         | 50.1                   |
| 10       |                                                         | 36.5                   |
| 11       |                                                         | 21.1                   |
| 12       |                                                         | 39.7                   |
| 13       |                                                         | 42.3                   |
| 14       |                                                         | 56.7                   |
| 15       |                                                         | 24.3                   |
| 16       |                                                         | 28.2                   |
| 17       |                                                         | 56.0                   |
| 18       | 0.69 (3H, <i>s</i> )                                    | 12.0                   |
| 19       | 1.02 (3H, <i>s</i> )                                    | 19.4                   |
| 20       |                                                         | 36.1                   |

|    |                          |      |
|----|--------------------------|------|
| 21 | 0.92 (3H, d, $J=6.6$ Hz) | 18.8 |
| 22 |                          | 33.9 |
| 23 |                          | 26.0 |
| 24 |                          | 45.8 |
| 25 |                          | 29.1 |
| 26 | 0.83 (3H, d, $J=6.9$ Hz) | 19.8 |
| 27 | 0.81 (3H, d, $J=6.1$ Hz) | 19.0 |
| 28 |                          | 23.0 |
| 29 | 0.86 (3H, m)             | 11.8 |

Pos\_AB-AE.mzML#1037 @2.83 MS1 p +, base peak: 579.1720 m/z (4.3E5)

Scan definition: scanId=169615

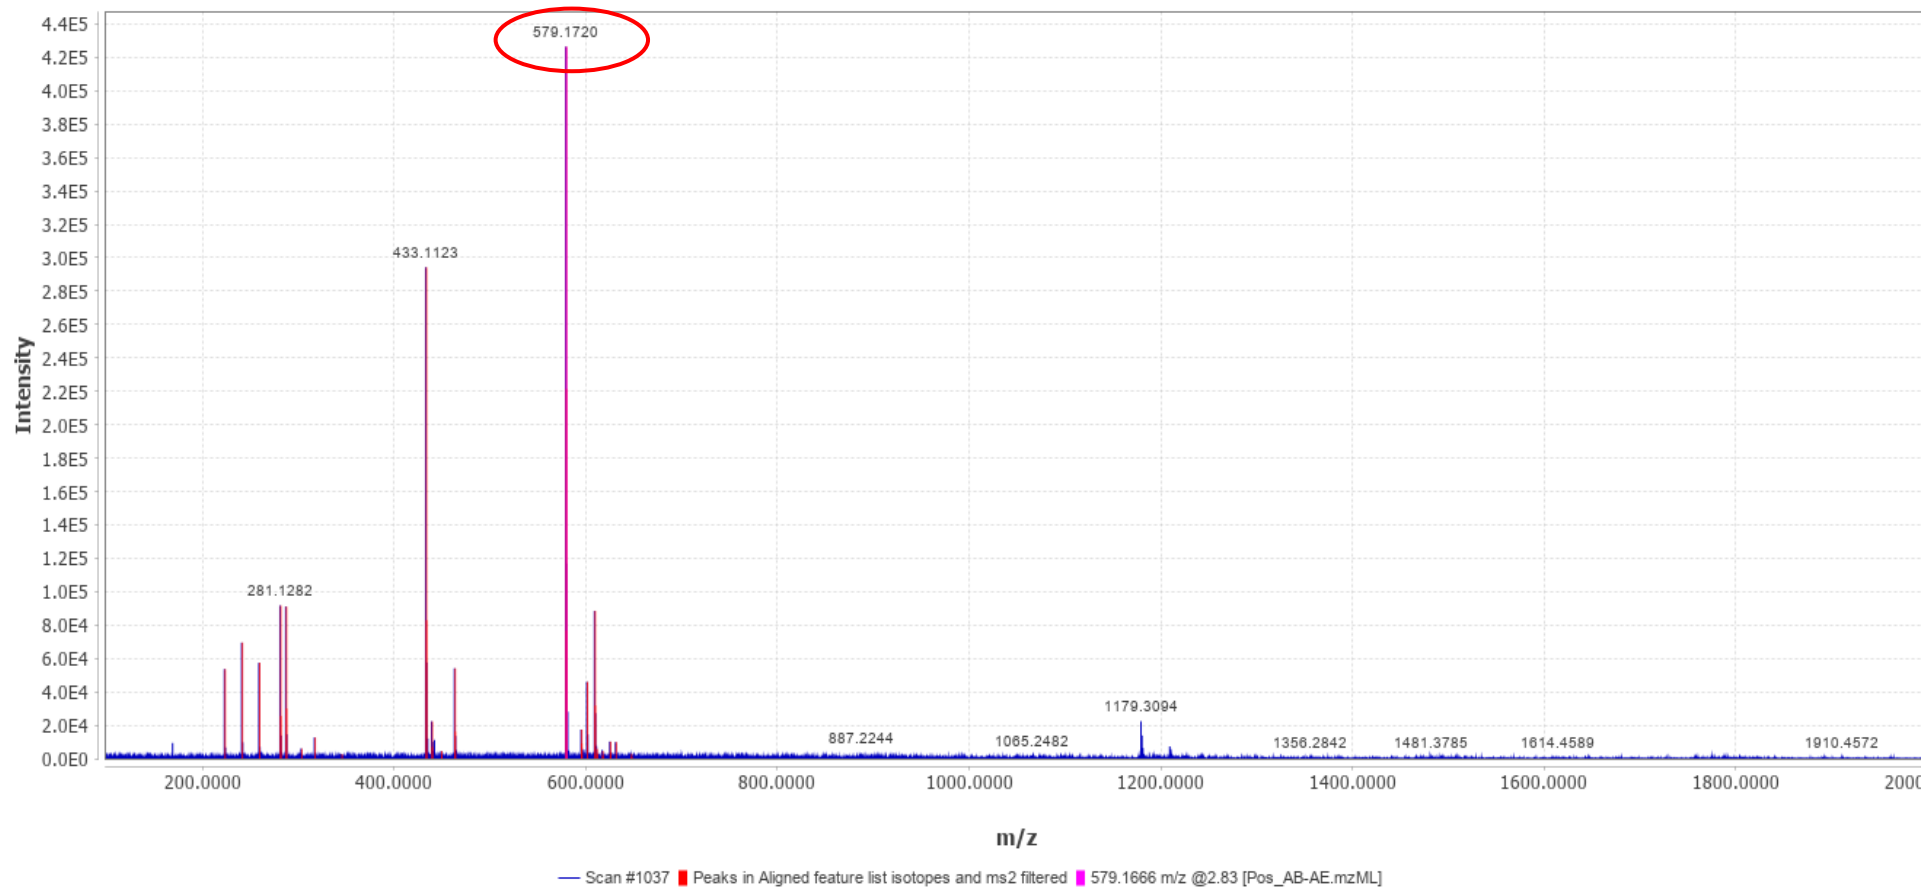

**Figure 1: LC-MS/MS of compound 1**

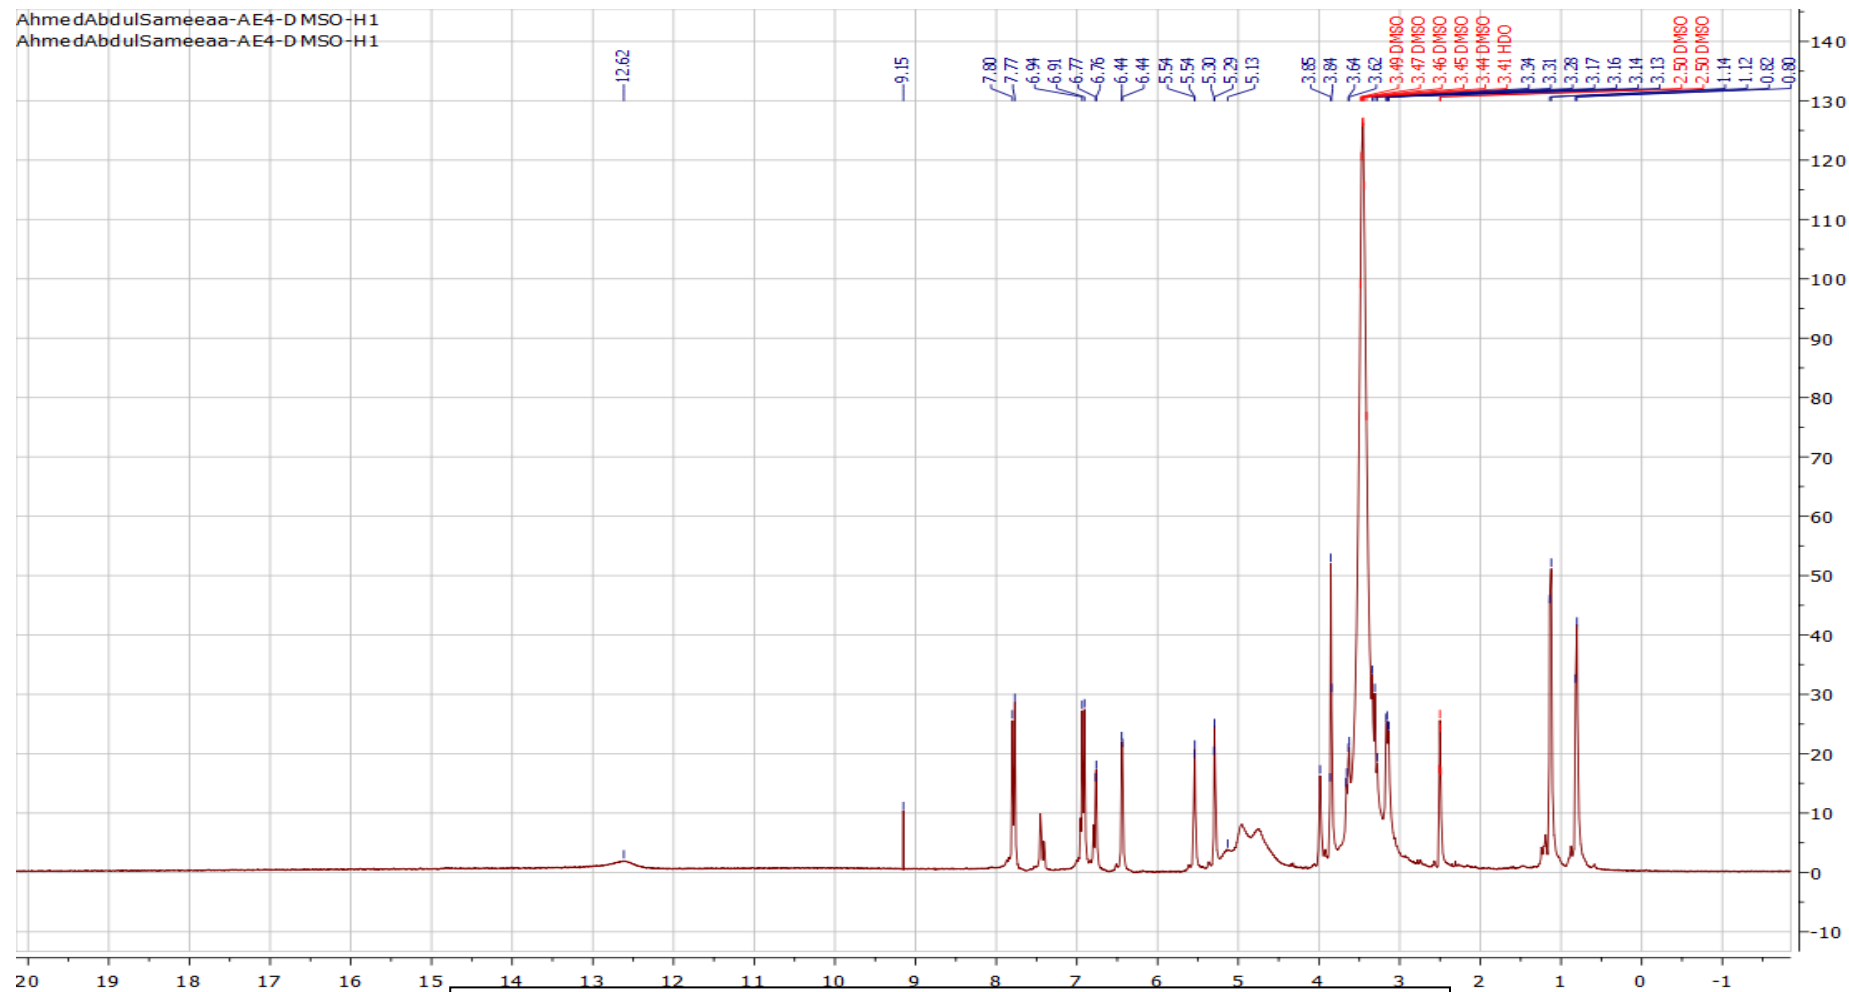

Figure 2: <sup>1</sup>H-NMR spectrum of compound 1 (300 MHz, DMSO-*d*<sub>6</sub>)





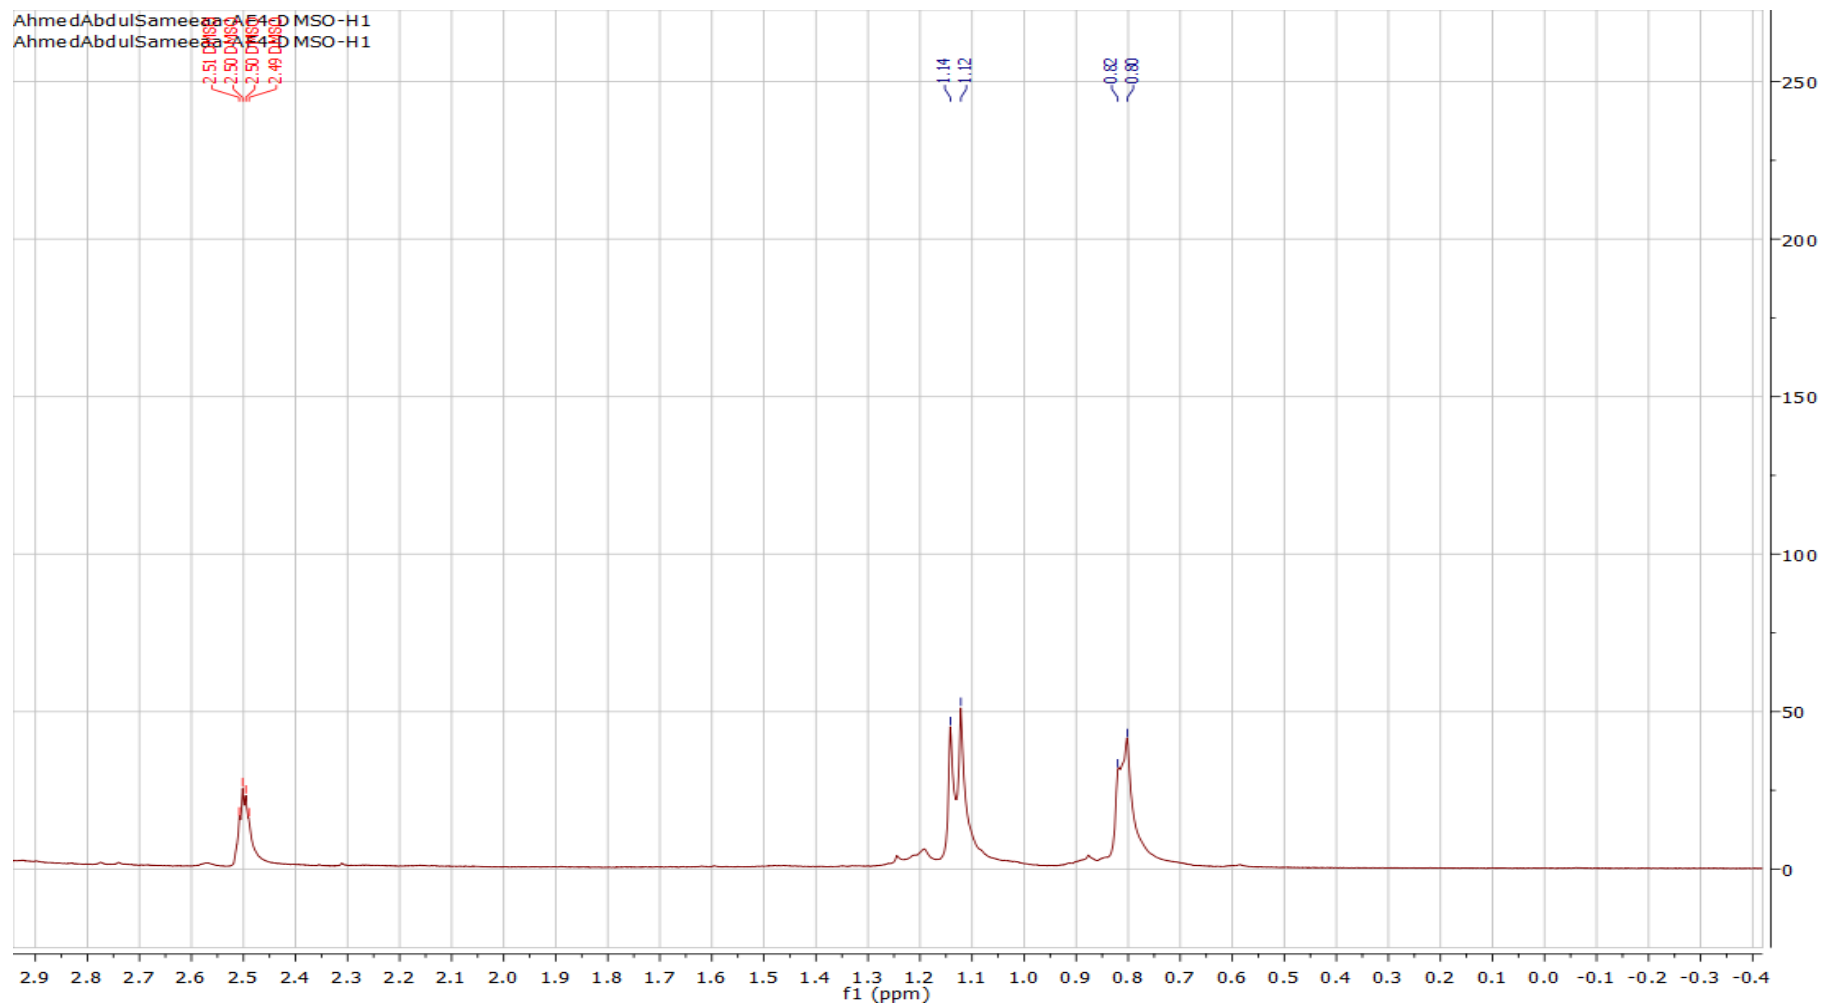

**Figure 3: Partial expansion of  $^1\text{H}$ -NMR spectrum of compound 1 (300 MHz,  $\text{DMSO-}d_6$ ).**



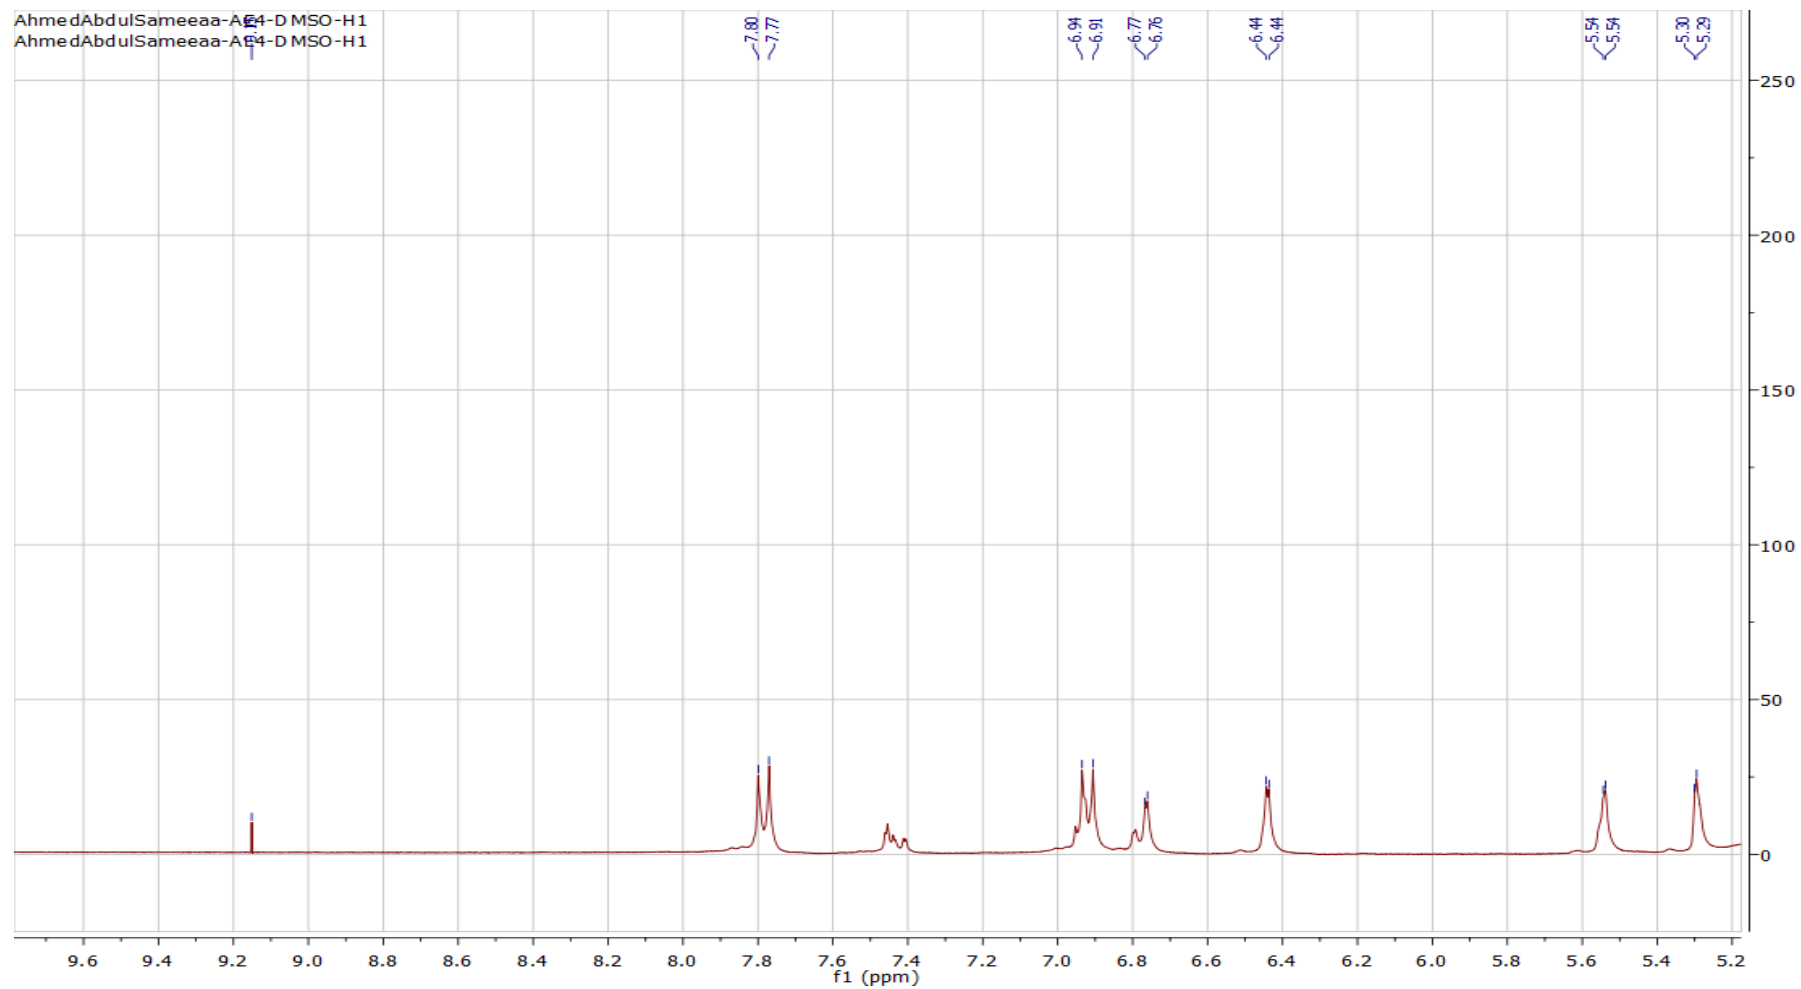

Figure 4: Partial expansion of  $^1\text{H}$ -NMR spectrum of compound 1 (300 MHz, DMSO- $d_6$ ).

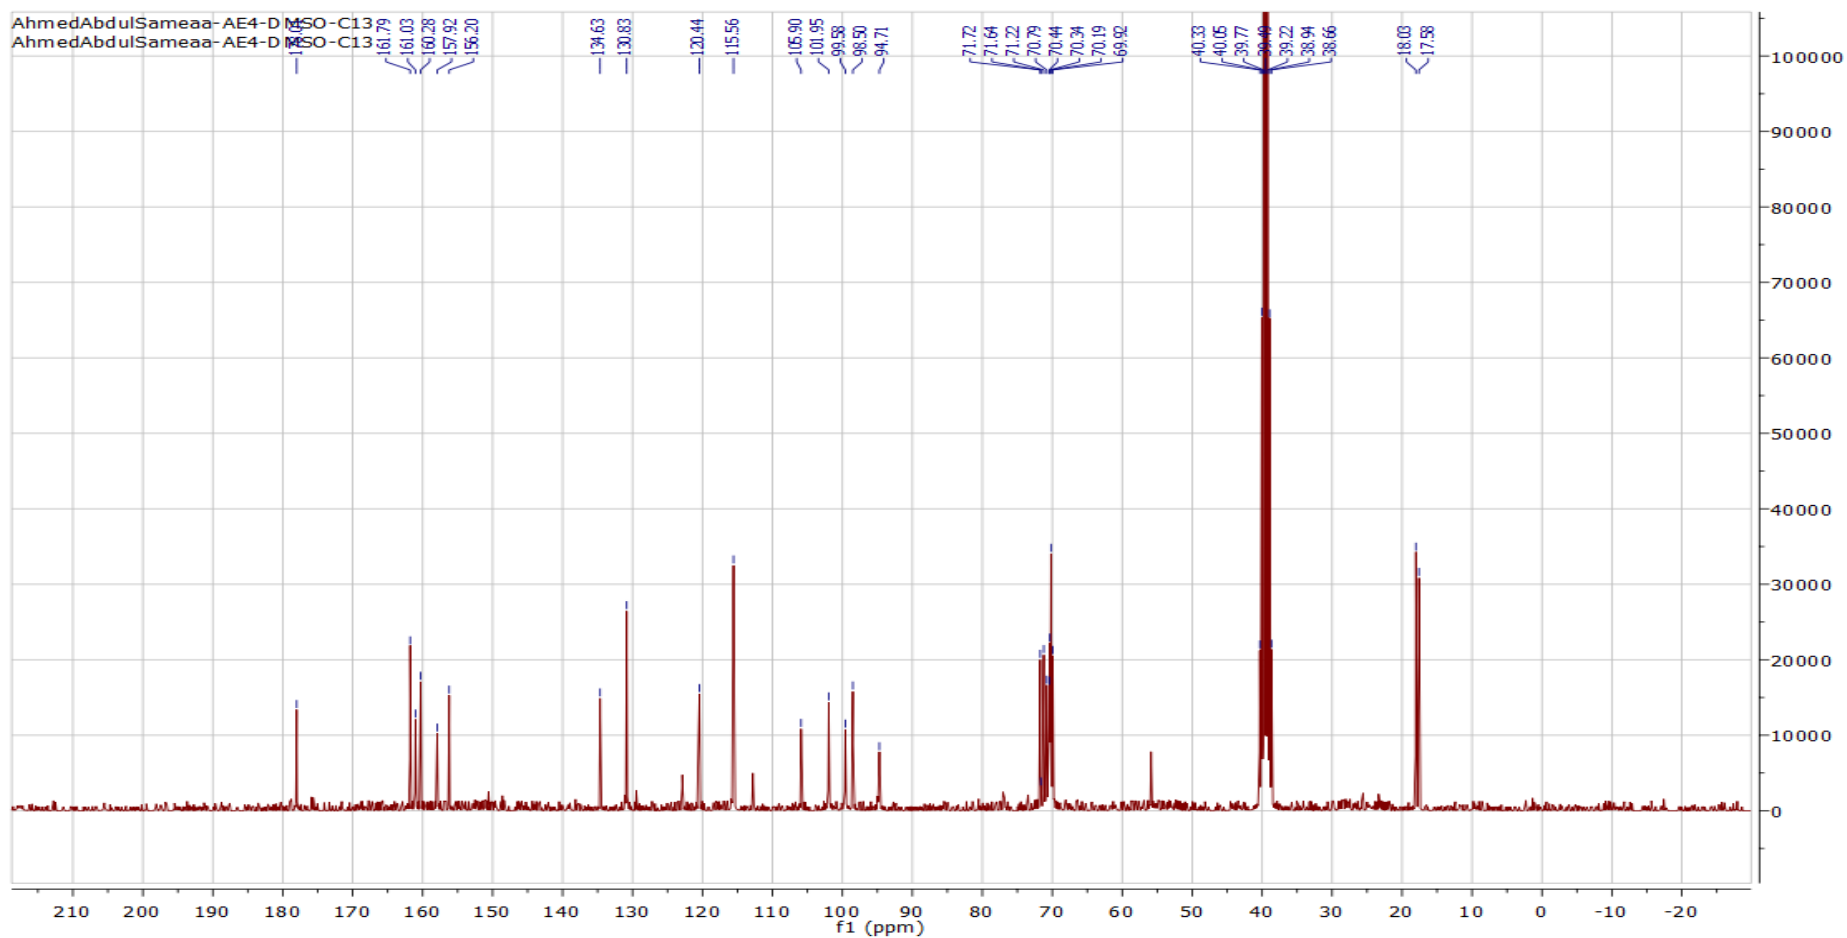

Figure 5: <sup>13</sup>C-NMR spectrum of compound 1 (75 MHz, DMSO-*d*<sub>6</sub>)



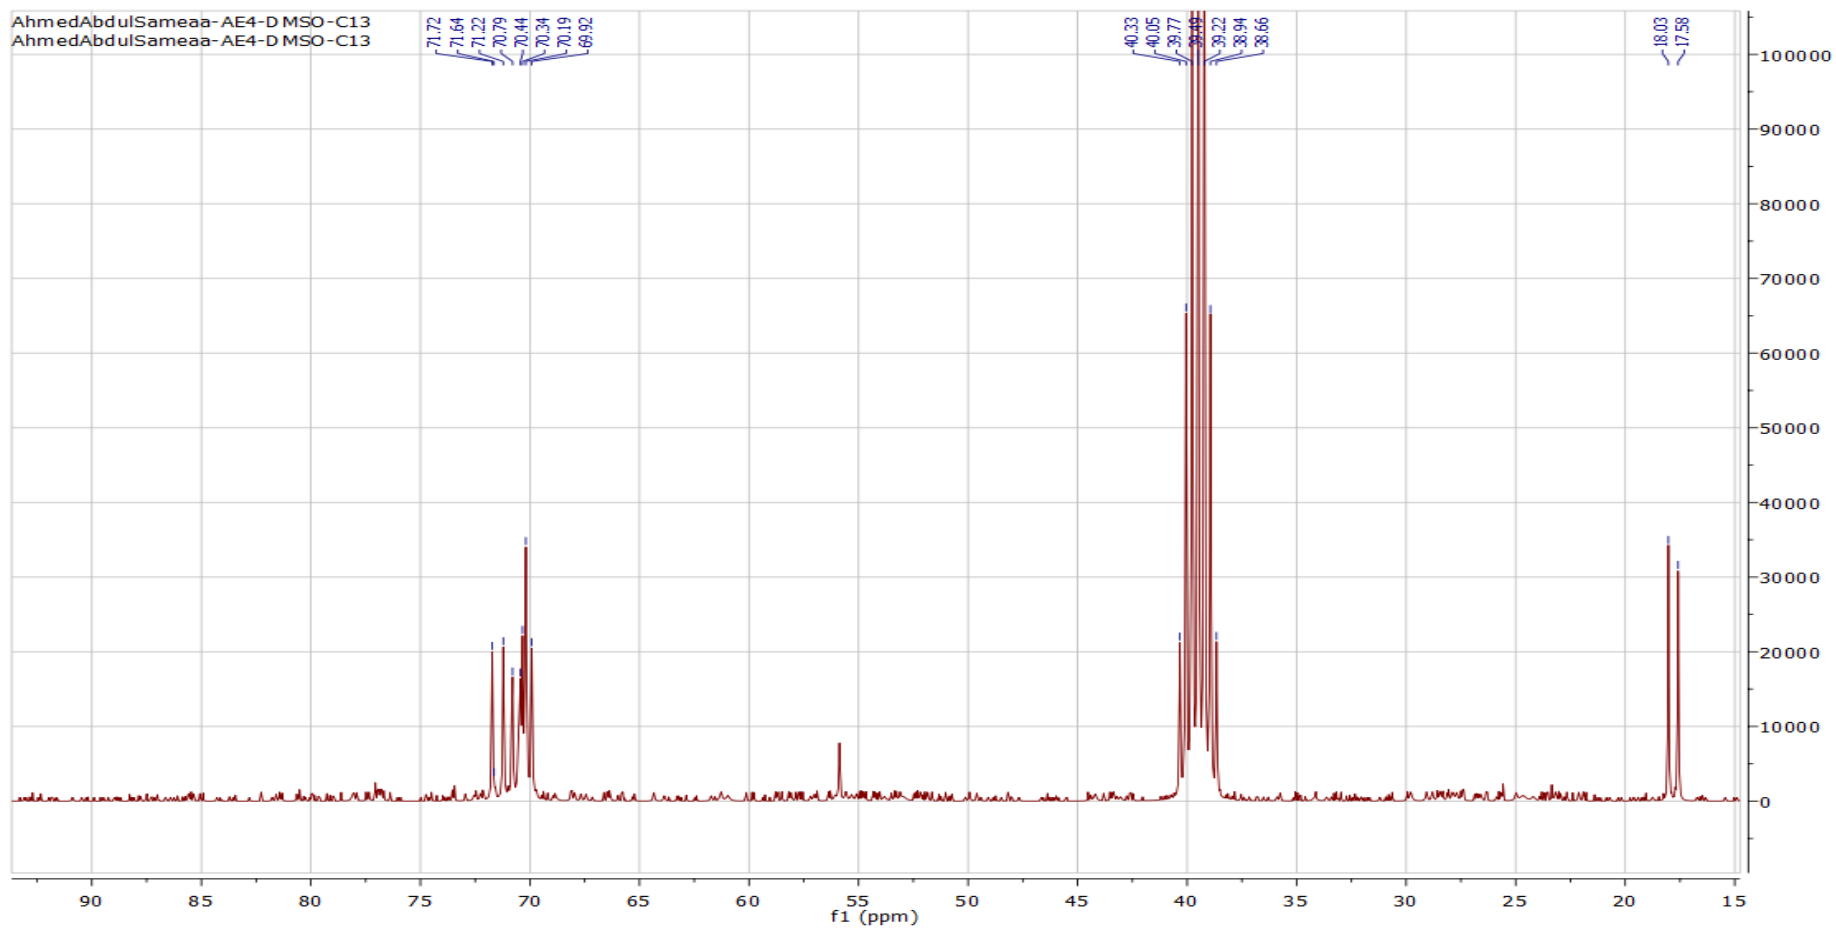

Figure 6: Partial expansion of  $^{13}\text{C}$ -NMR spectrum of compound 1 (75 MHz, DMSO- $d_6$ )

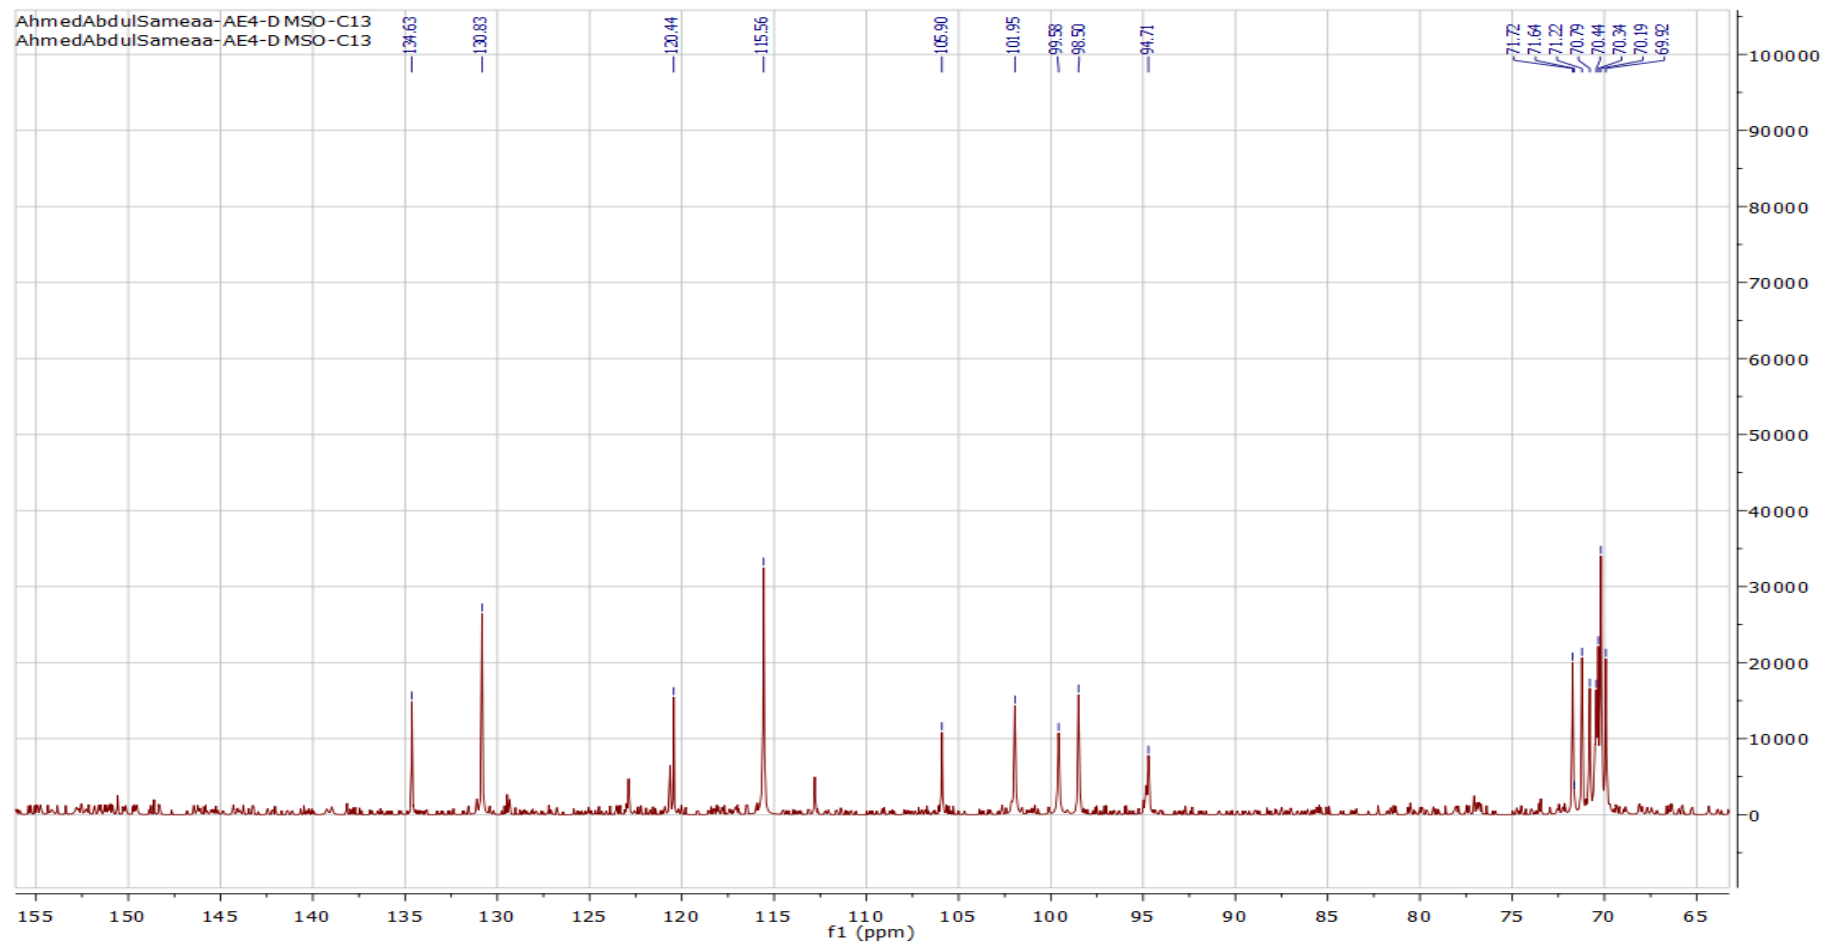

Figure 7: Partial expansion of  $^{13}\text{C}$ -NMR spectrum of compound 1 (75 MHz, DMSO- $d_6$ )





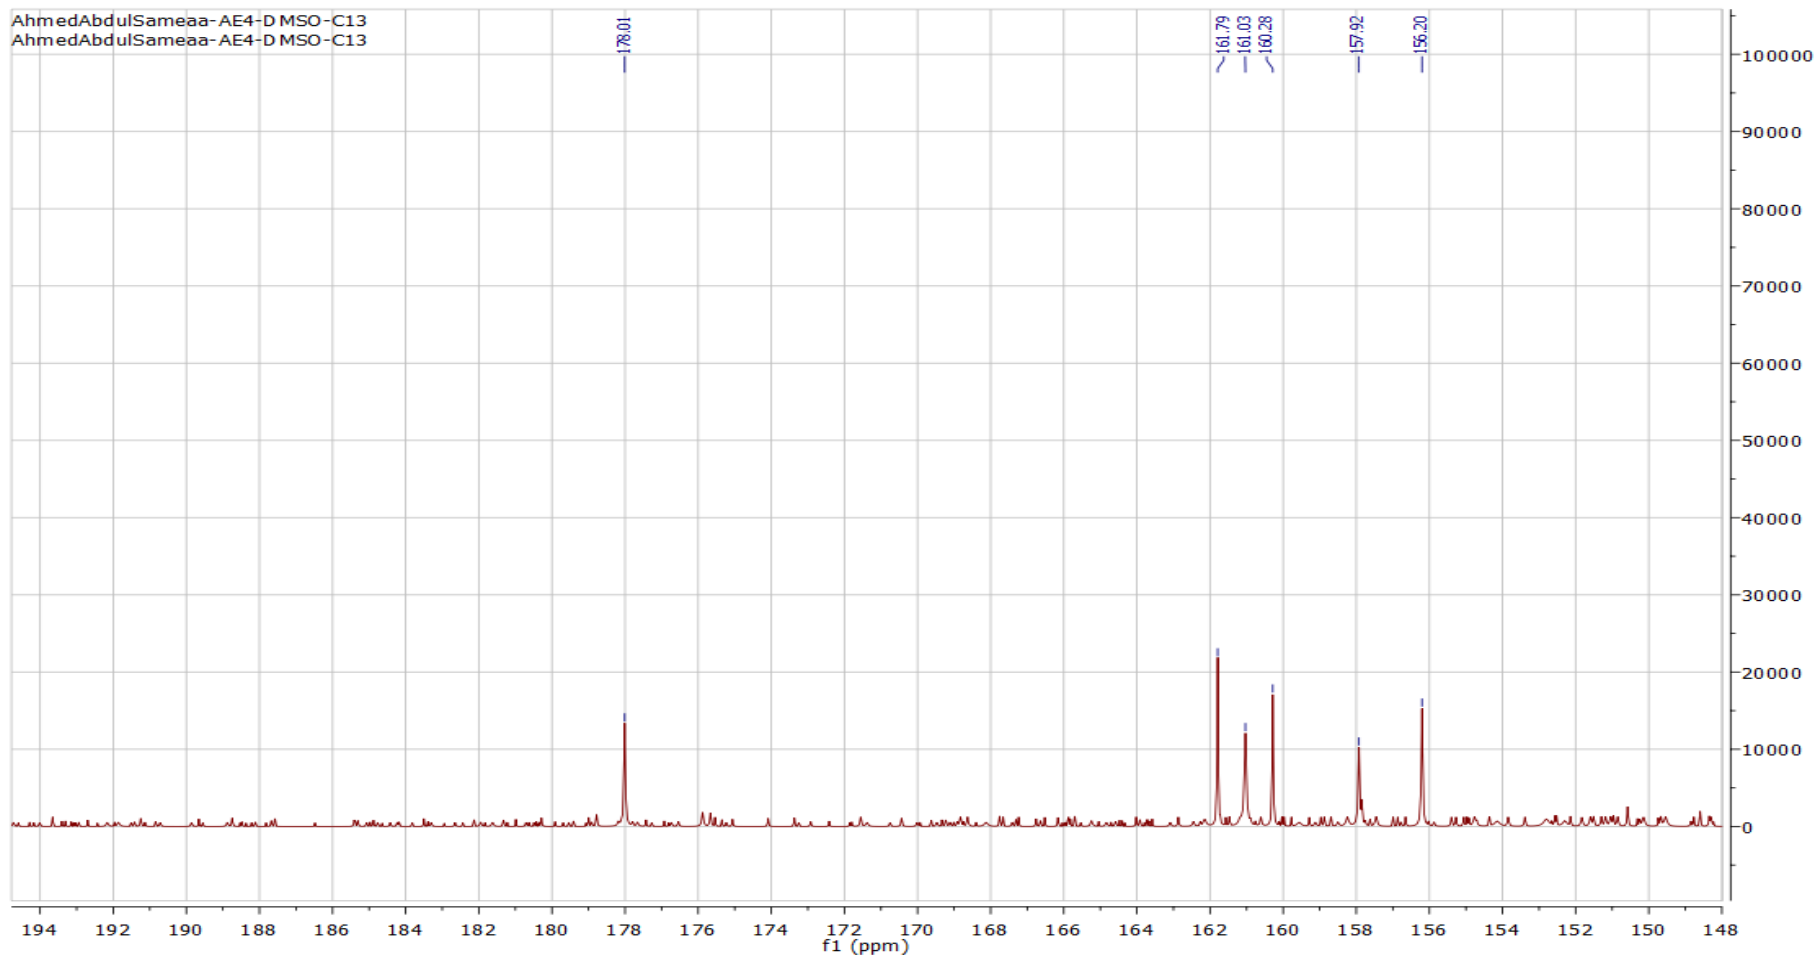

Figure 8: Partial expansion of  $^{13}\text{C}$ -NMR spectrum of compound 1 (75 MHz,  $\text{DMSO-}d_6$ )

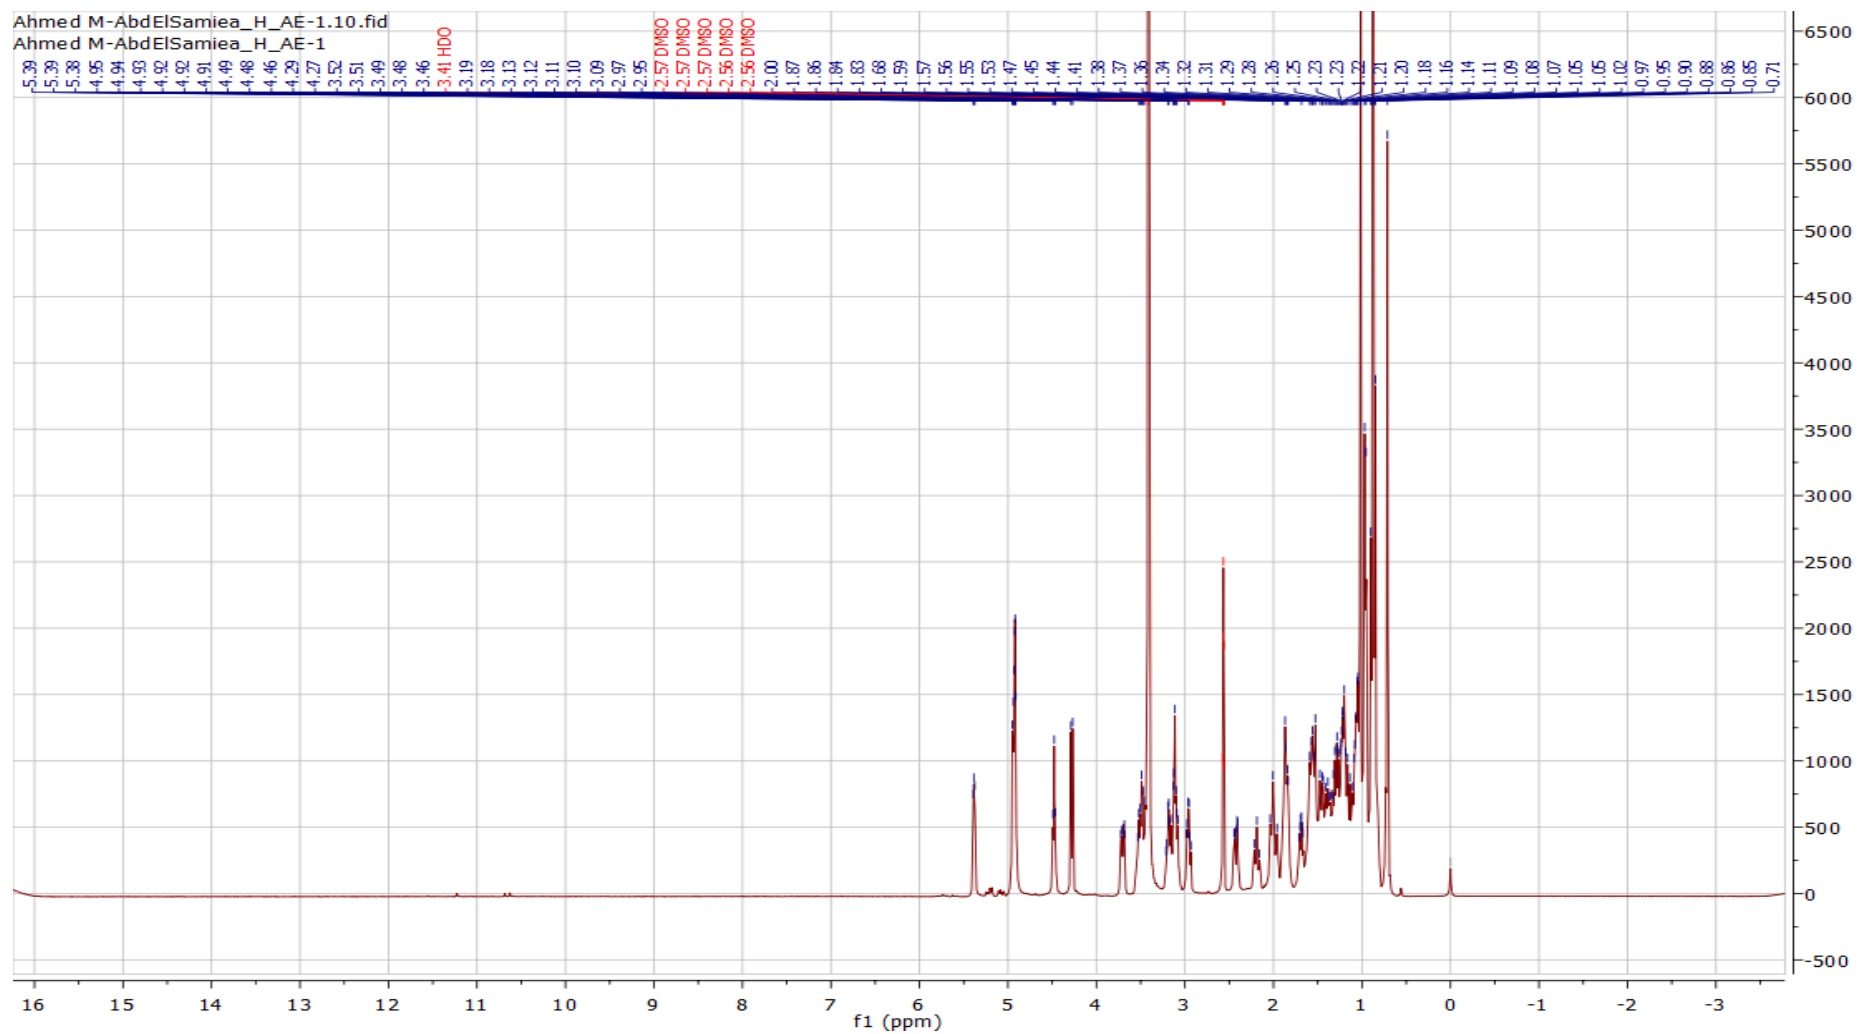

**Figure 9:  $^1\text{H}$ -NMR spectrum of compound 2 (300 MHz, DMSO- $d_6$ )**

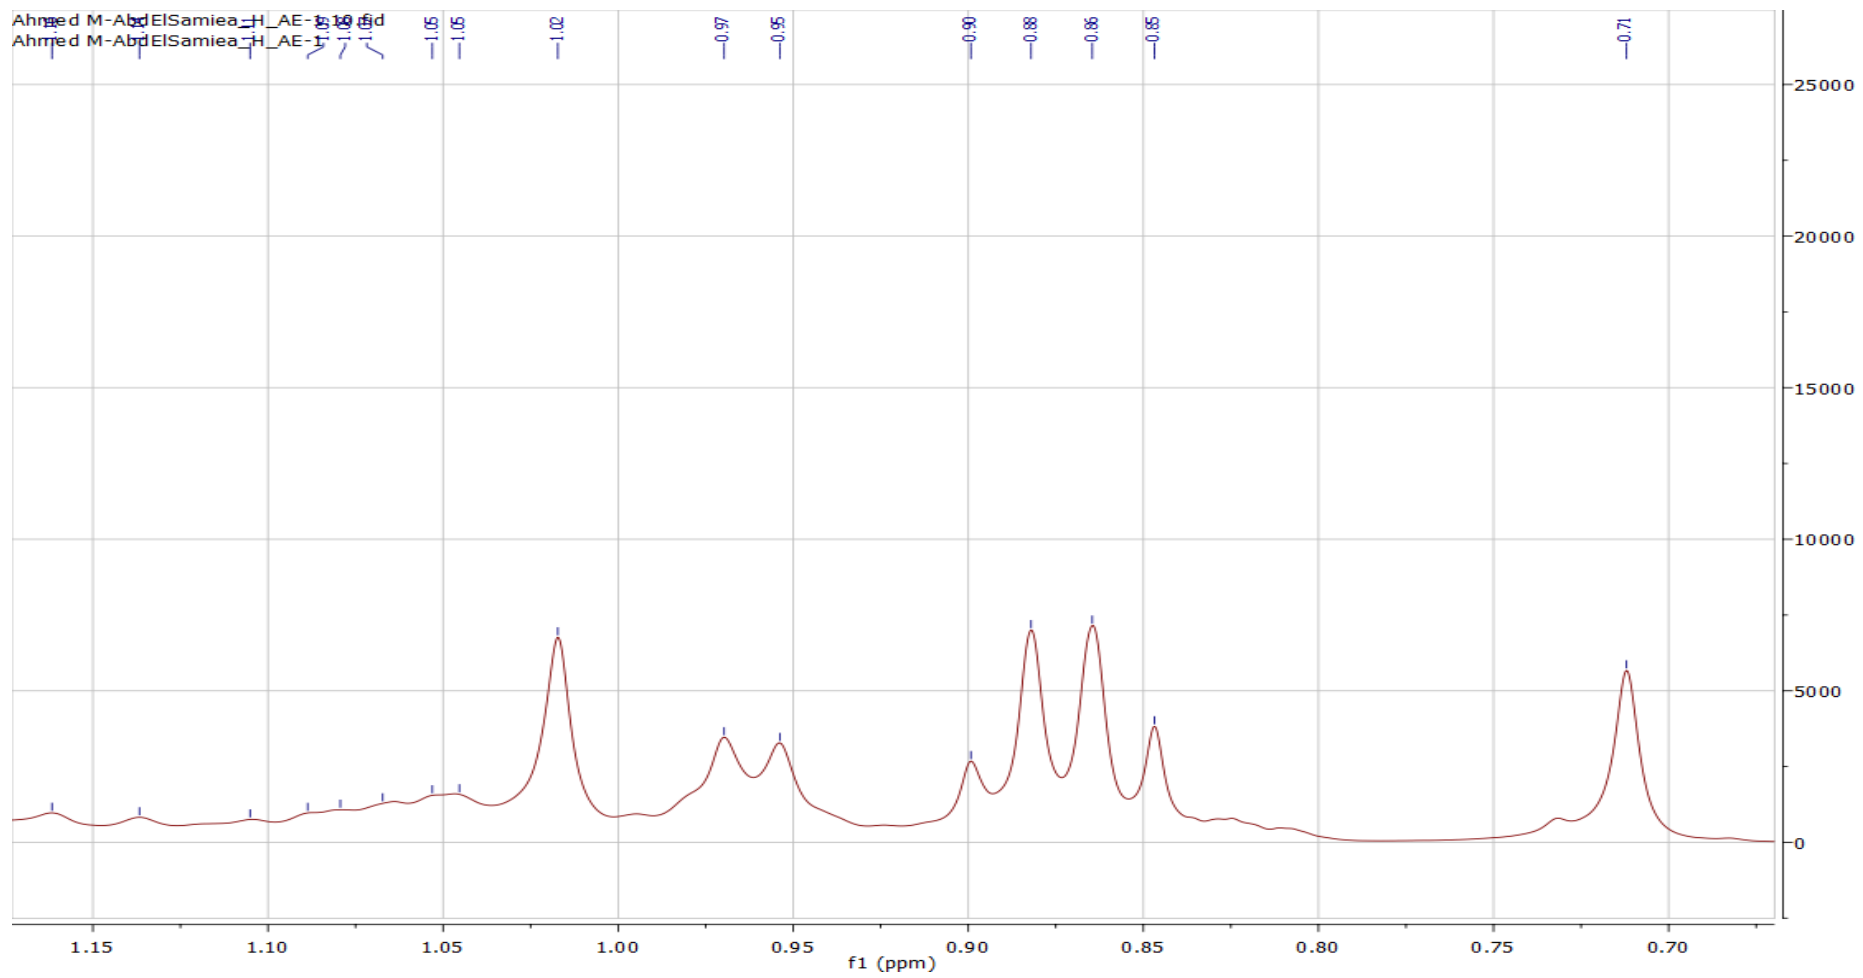

**Figure 10: Partial expansion of <sup>1</sup>H-NMR spectrum of compound 2 (400 MHz, DMSO-*d*<sub>6</sub>).**

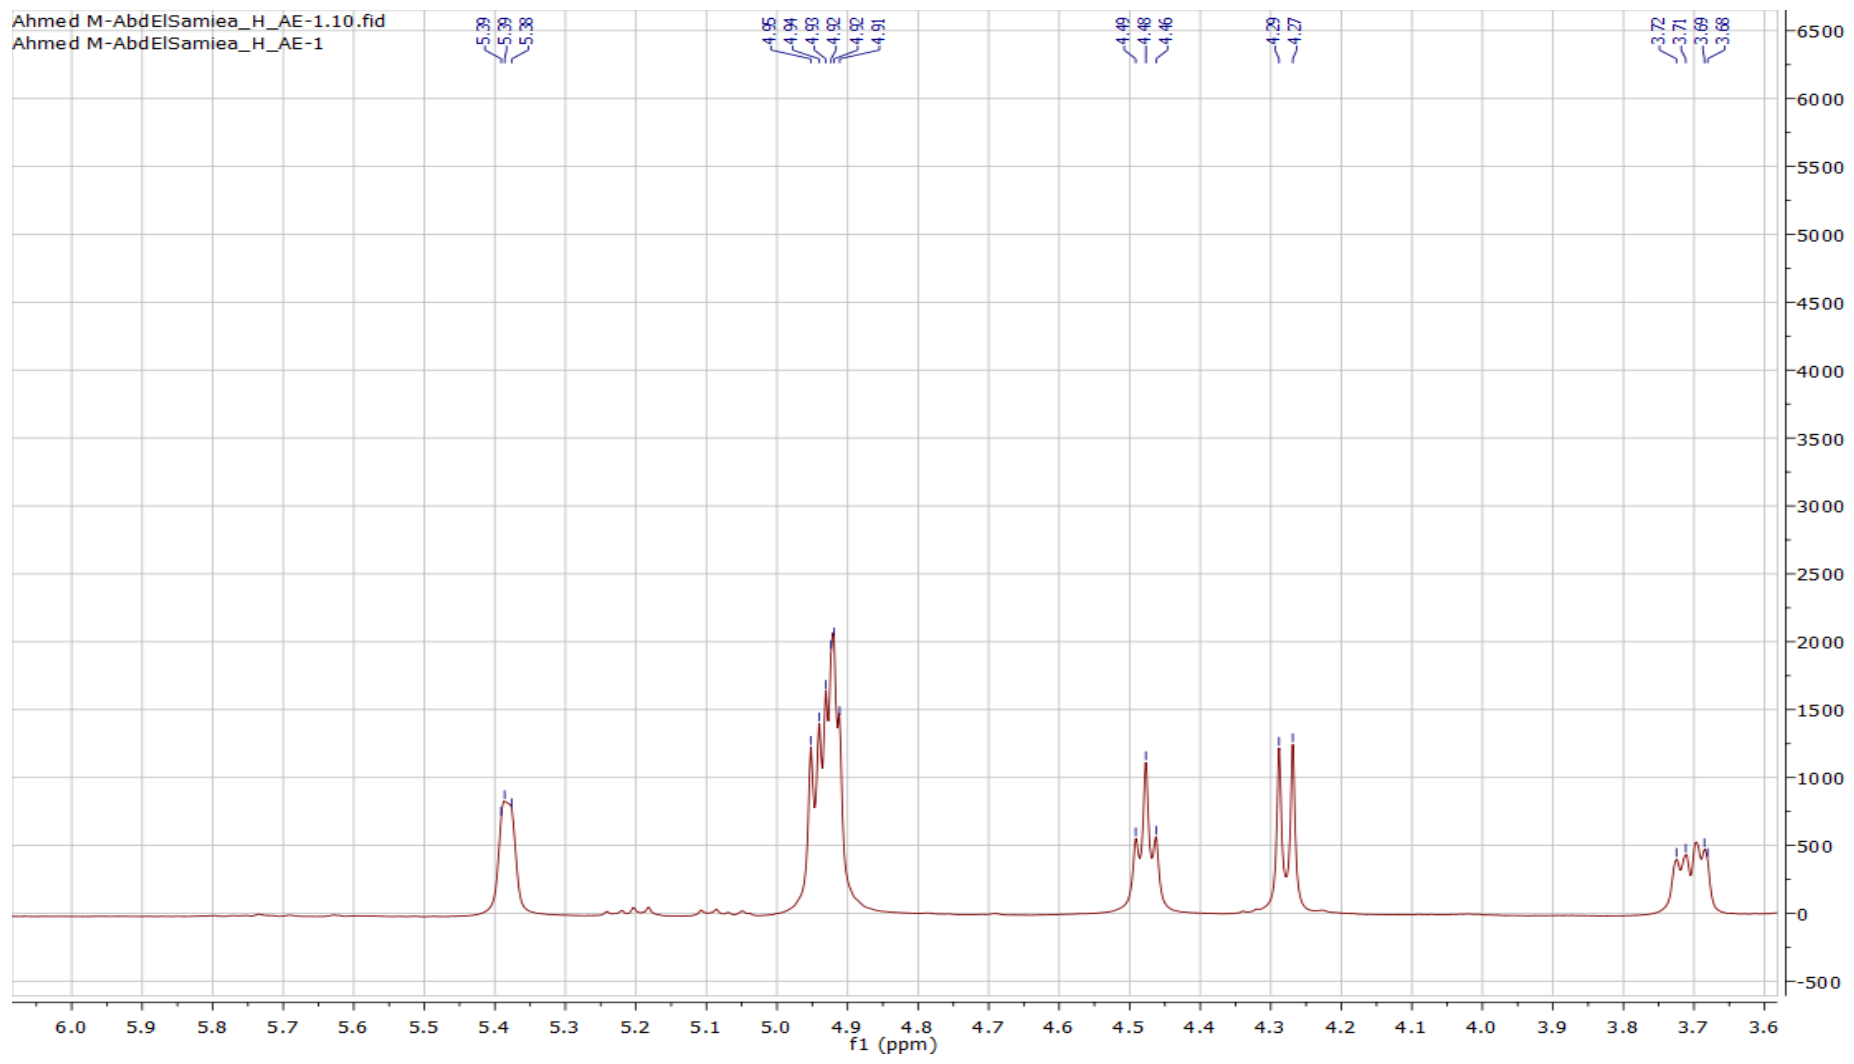

**Figure 11: Partial expansion of <sup>1</sup>H-NMR spectrum of compound 2 (400 MHz, DMSO-*d*<sub>6</sub>).**

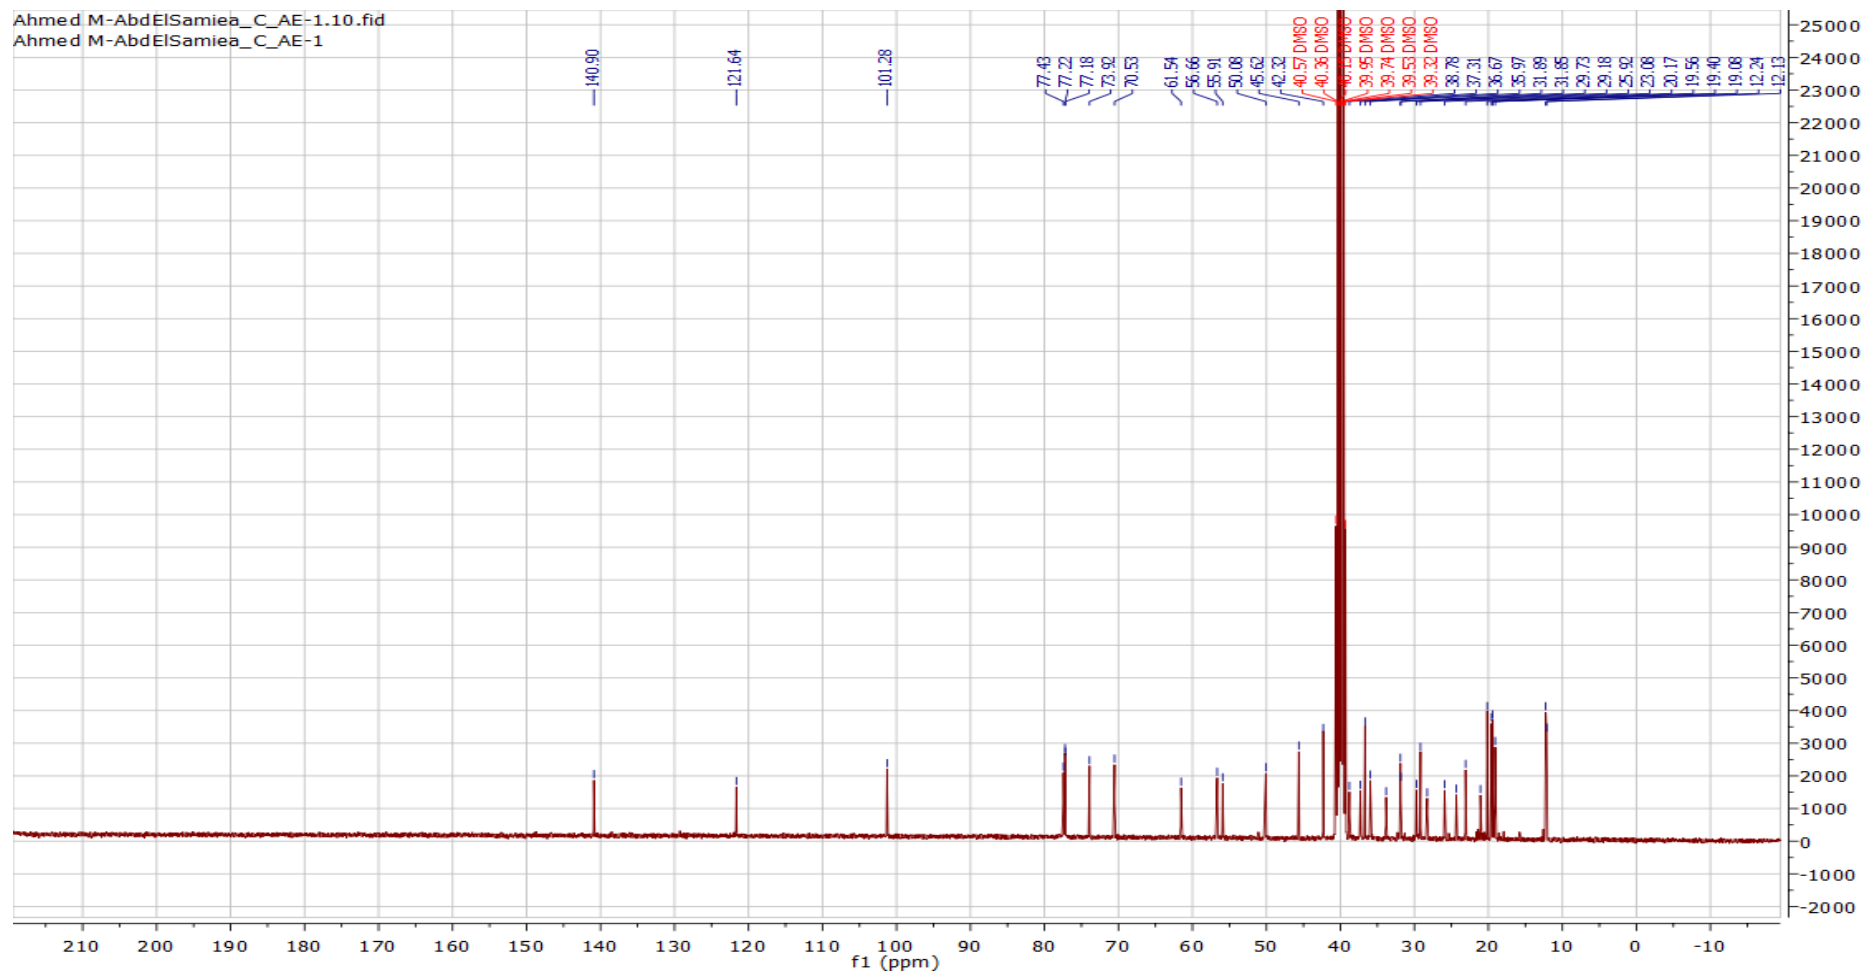

Figure 12:  $^{13}\text{C}$ -NMR spectrum of compound 2 (100 MHz, DMSO- $d_6$ )



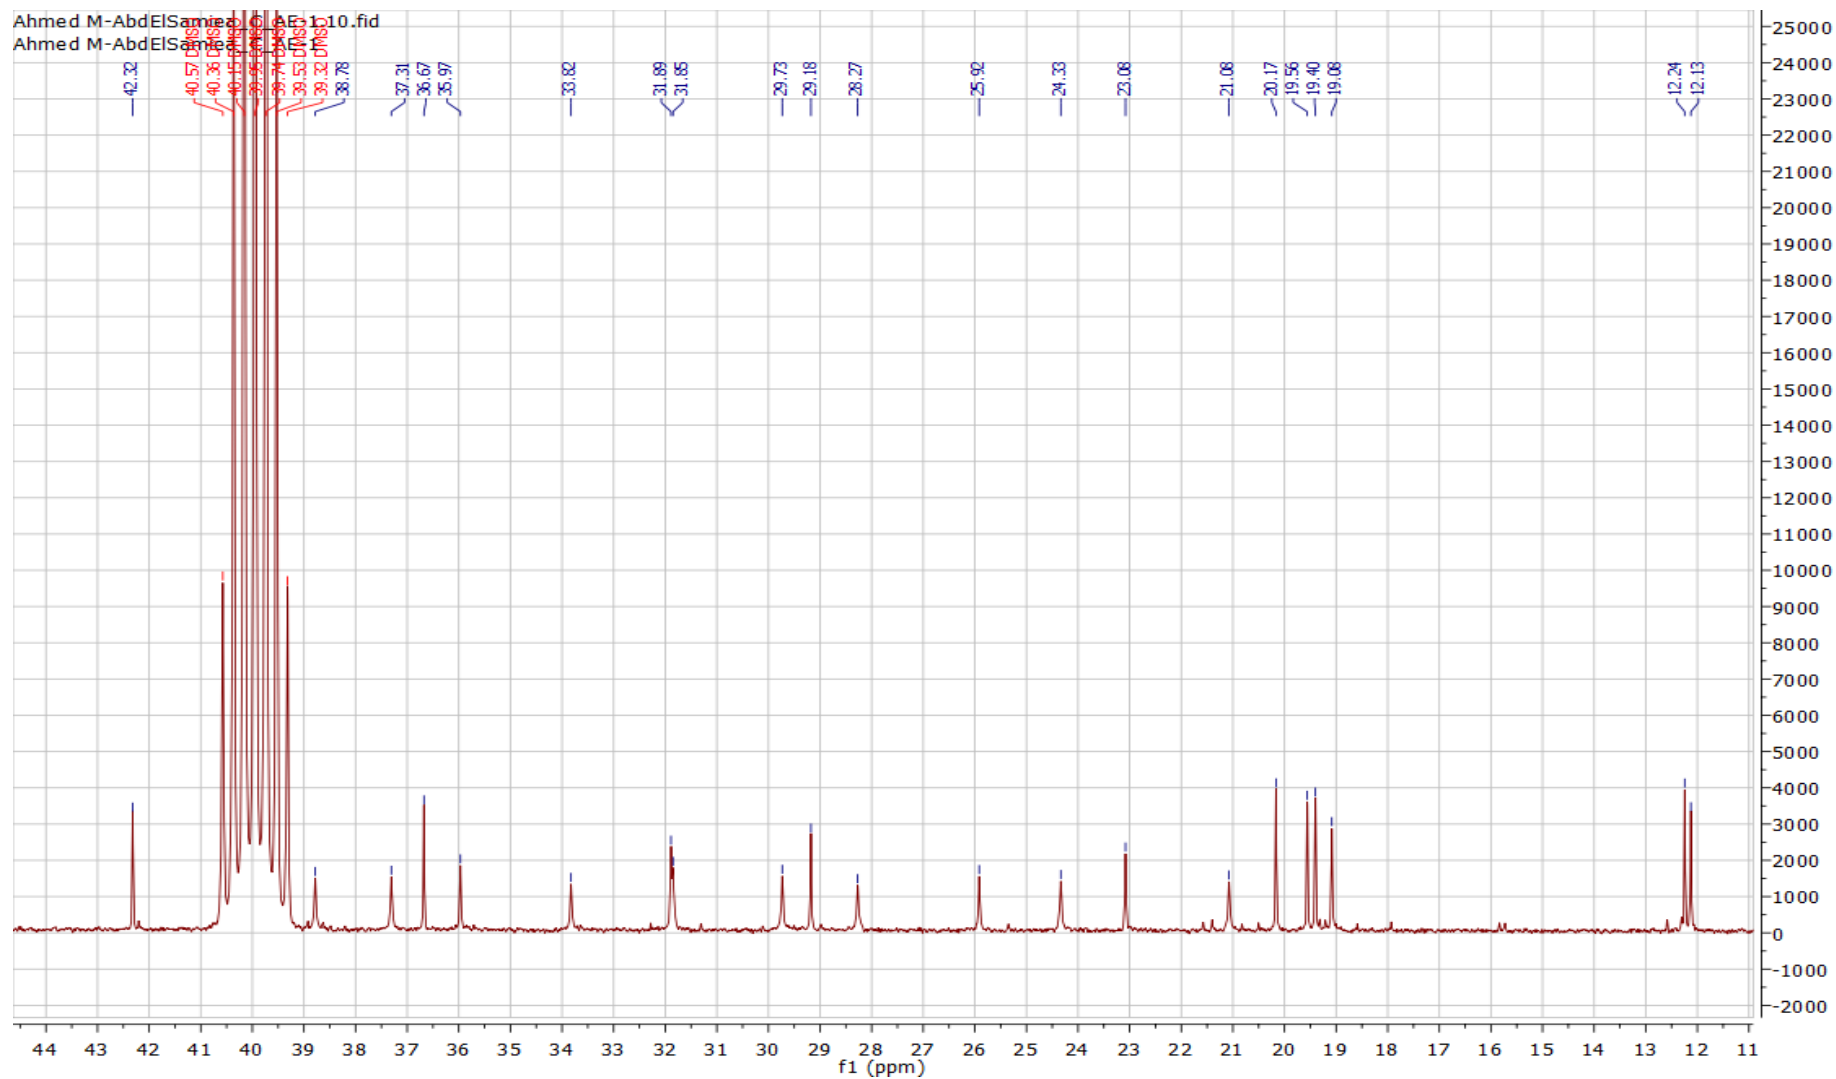

**Figure 13: Partial expansion of  $^{13}\text{C}$ -NMR spectrum of compound 2 (100 MHz, DMSO-*d*<sub>6</sub>)**



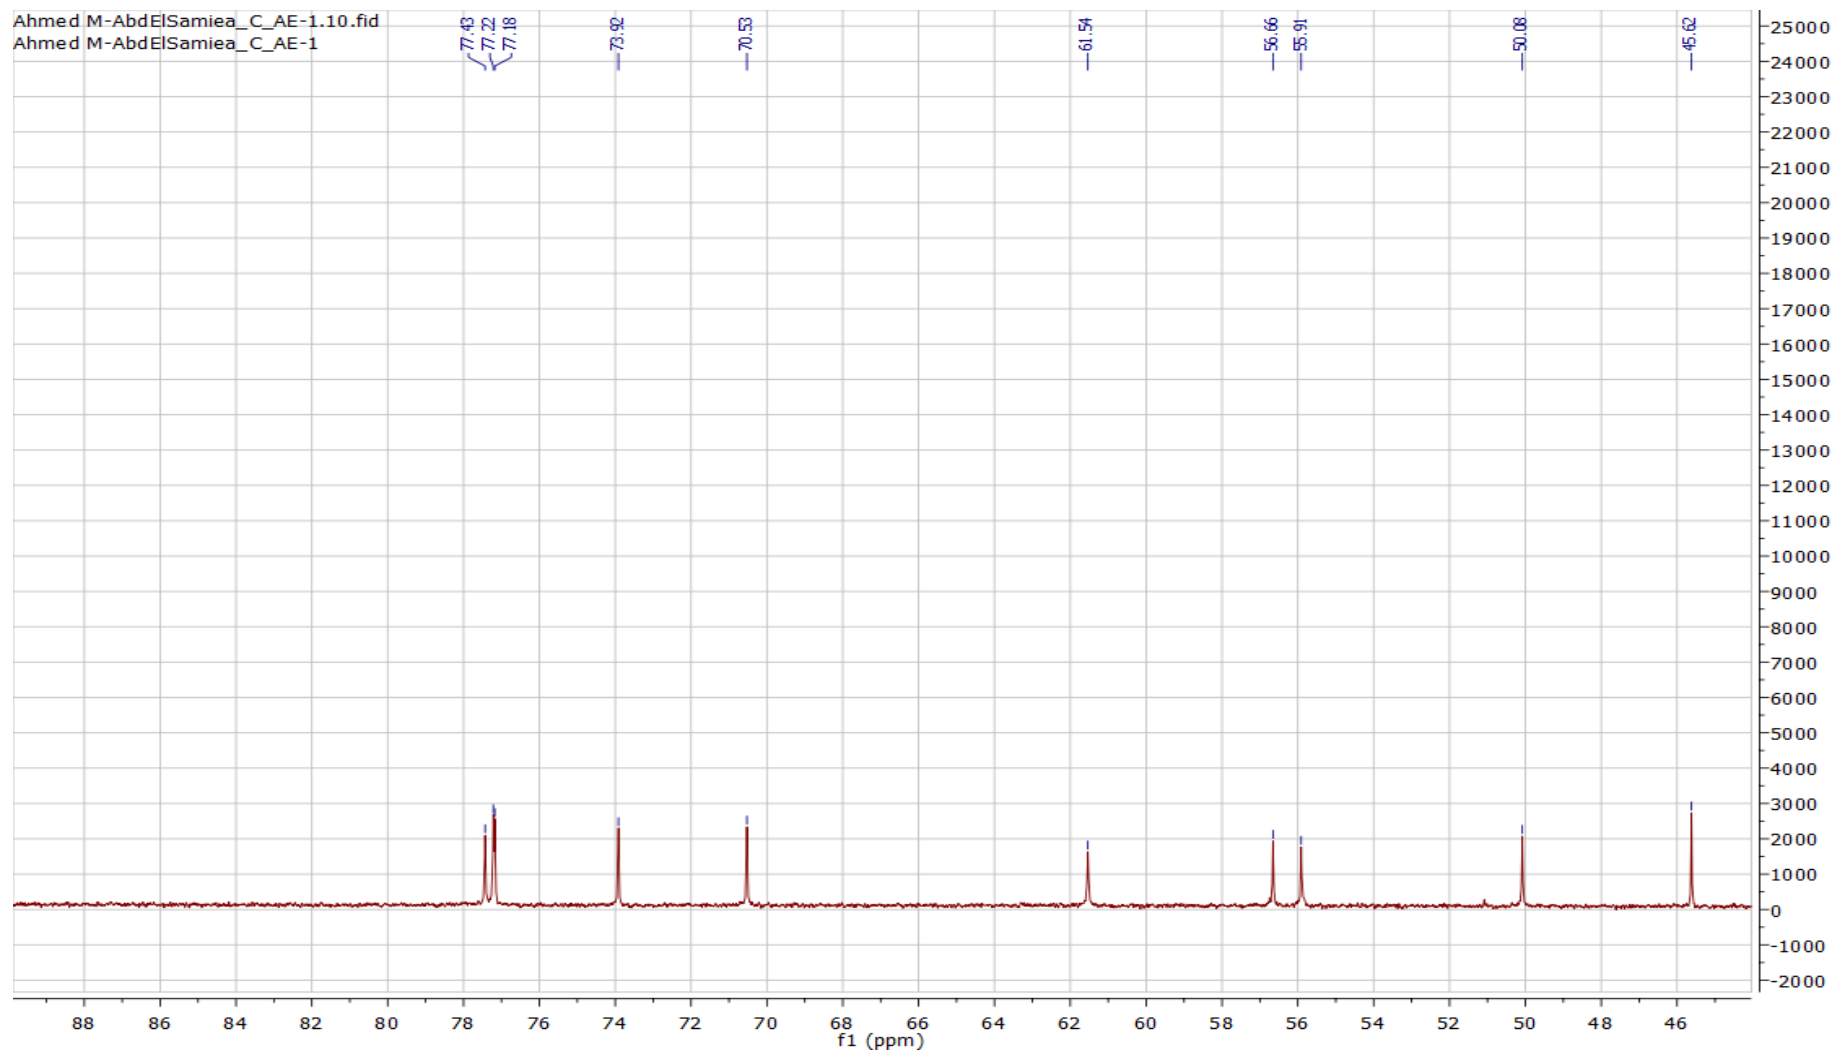

Figure 14: Partial expansion of  $^{13}\text{C}$ -NMR spectrum of compound 2 (100 MHz,  $\text{DMSO-}d_6$ )

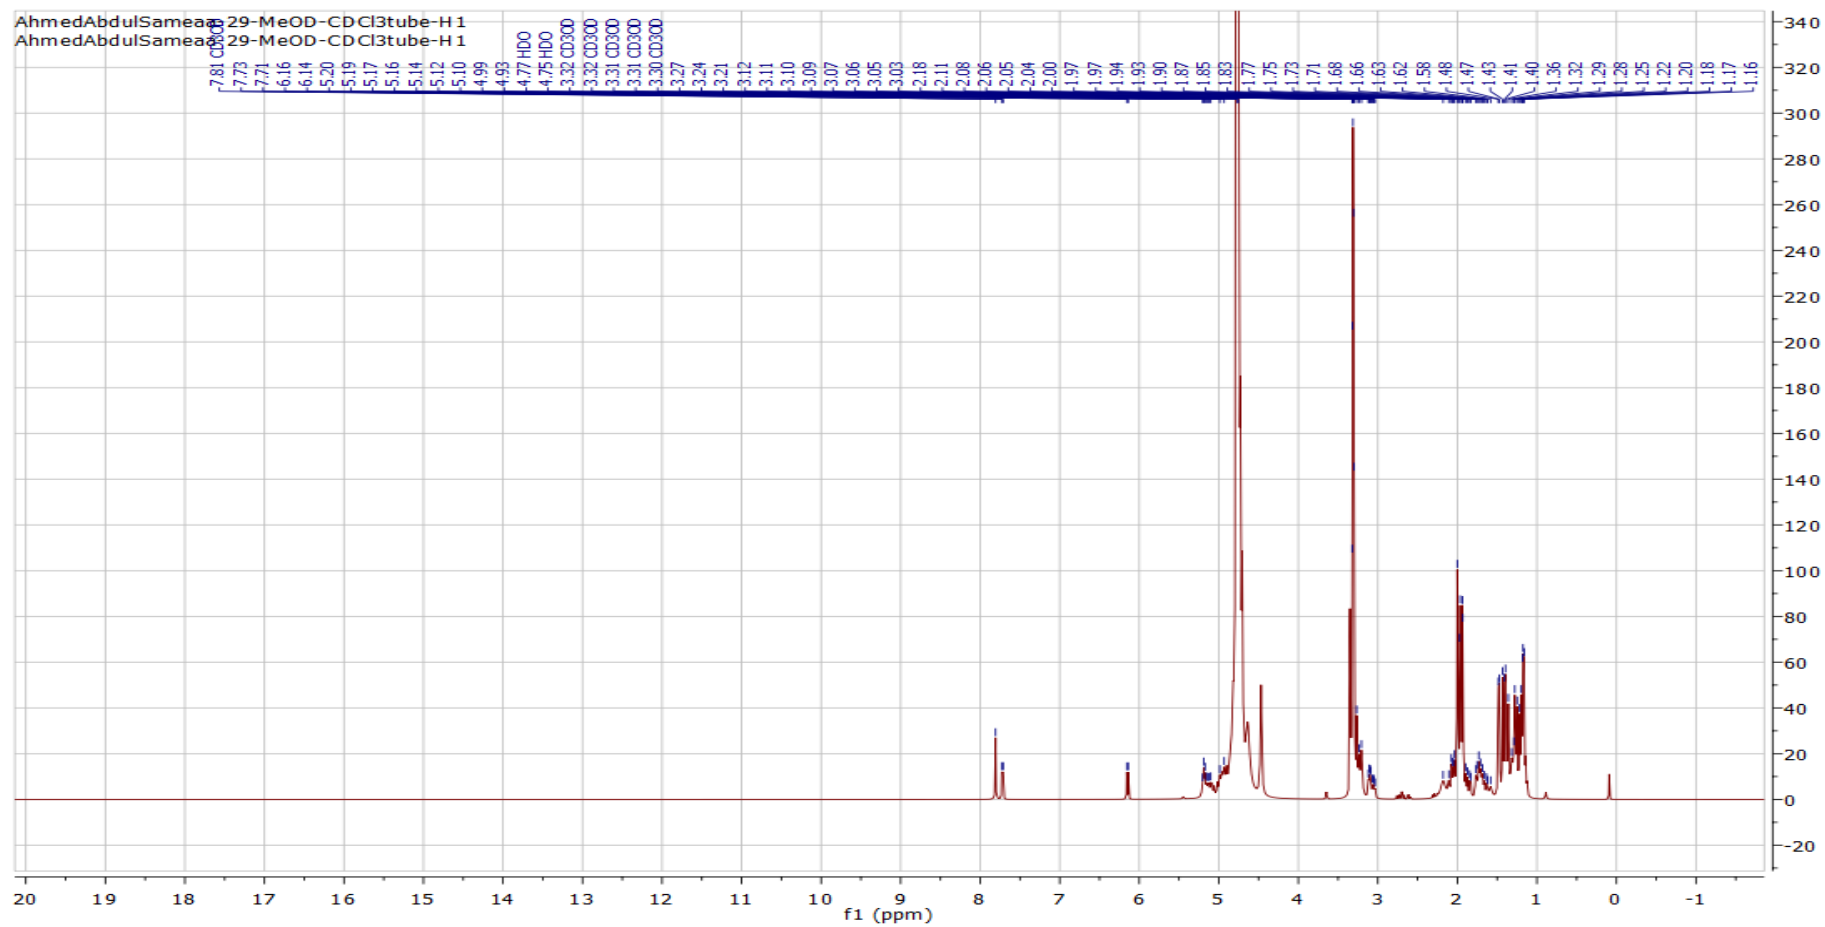

**Figure 15: <sup>1</sup>H-NMR spectrum of compound 3 (300 MHz, CDCl<sub>3</sub>-CD<sub>3</sub>OD)**



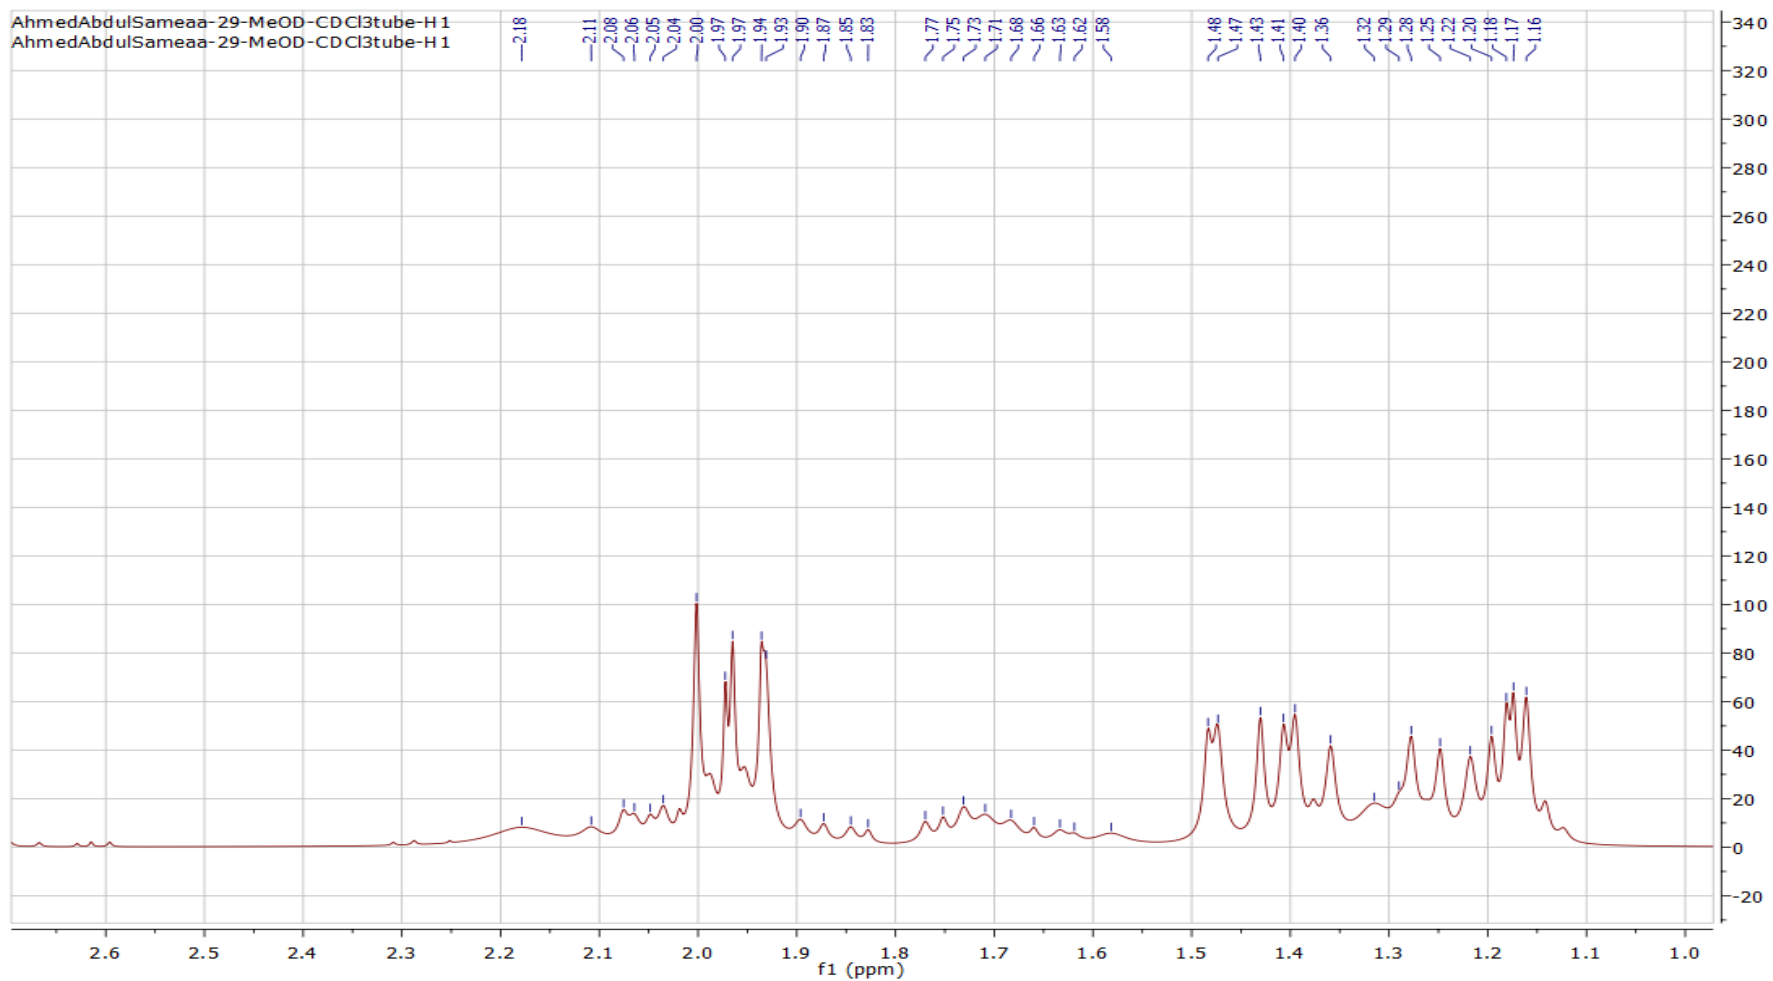

**Figure 16: Partial expansion of  $^1\text{H}$ -NMR spectrum of compound 3 (300 MHz,  $\text{CDCl}_3\text{-CD}_3\text{OD}$ )**

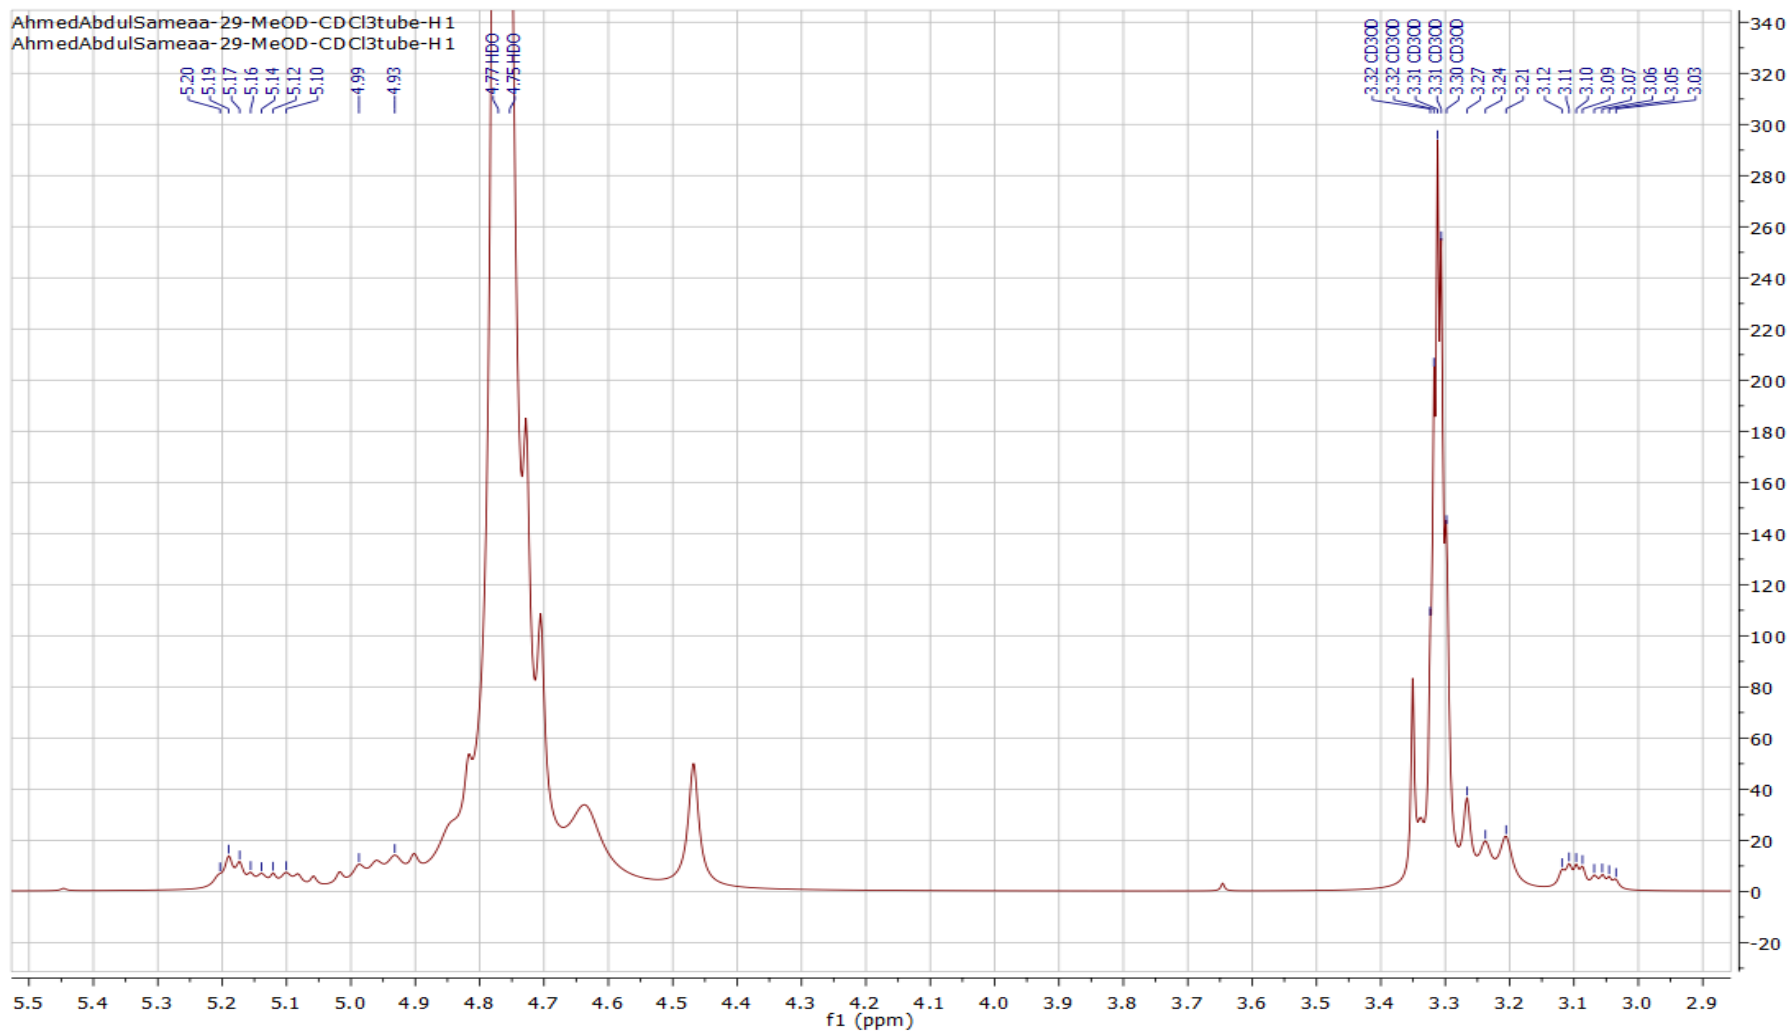

Figure 17: Partial expansion of <sup>1</sup>H-NMR spectrum of compound 3 (300 MHz, CDCl<sub>3</sub>-CD<sub>3</sub>OD)

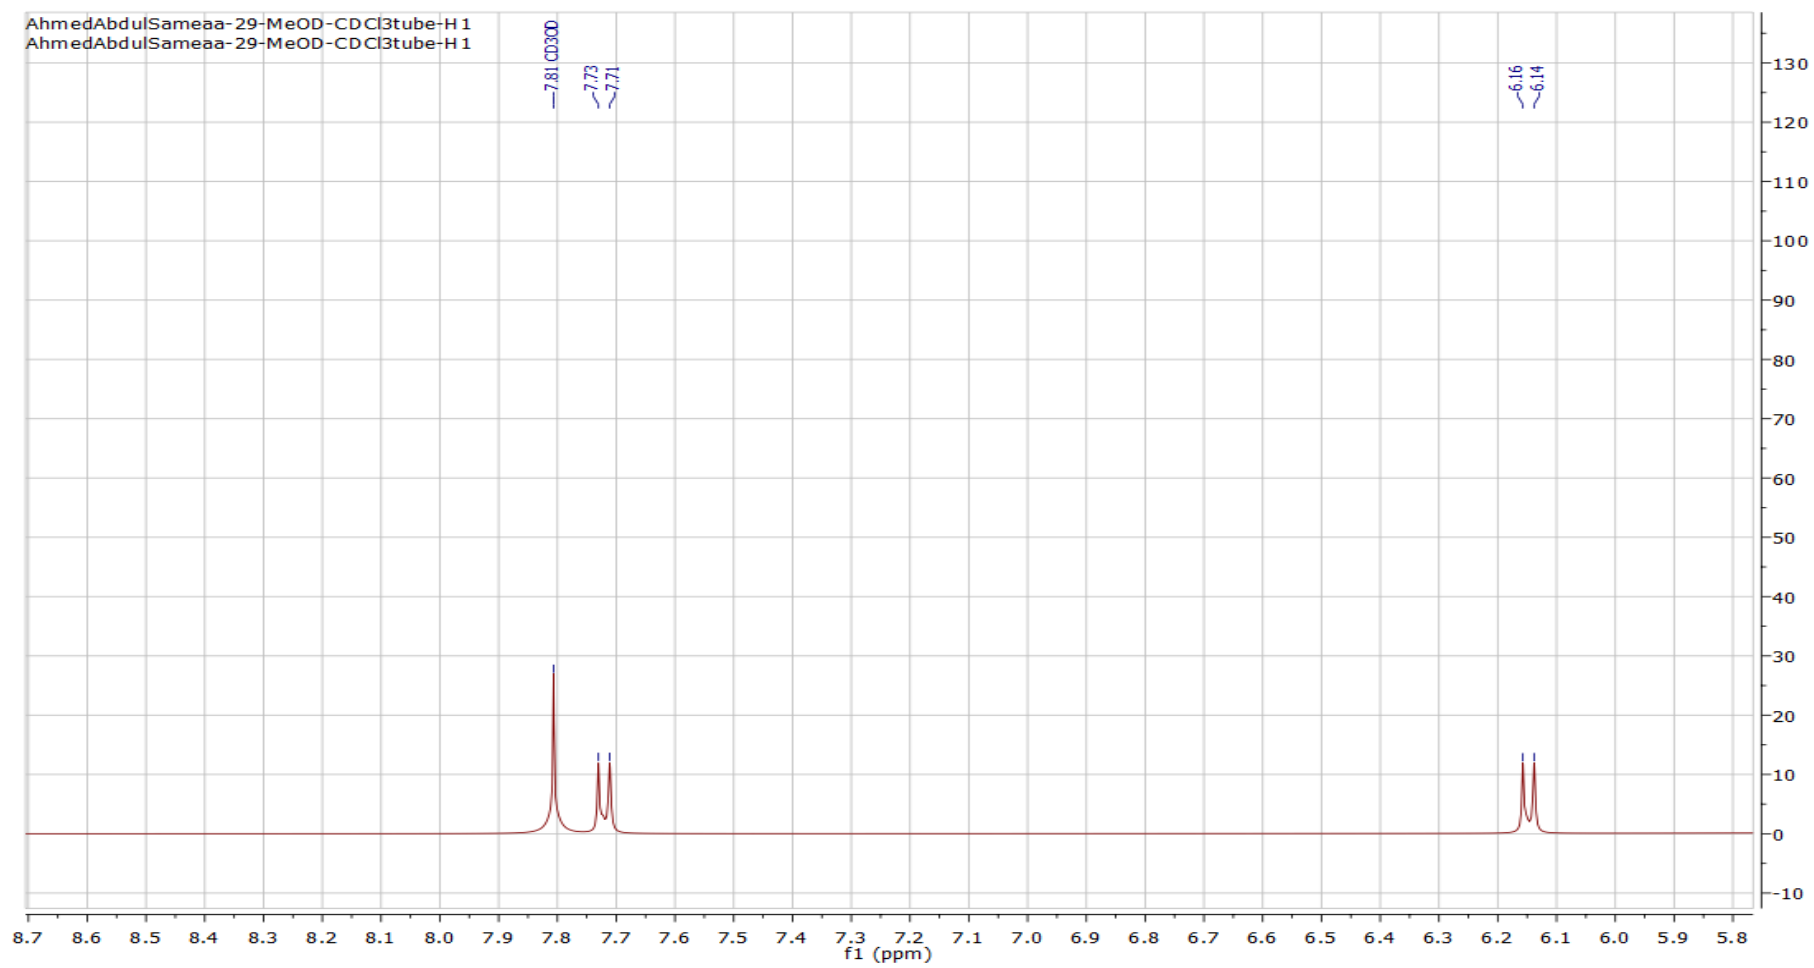

**Figure 18: Partial expansion of <sup>1</sup>H-NMR spectrum of compound 3 (300 MHz, CDCl<sub>3</sub>-CD<sub>3</sub>OD)**



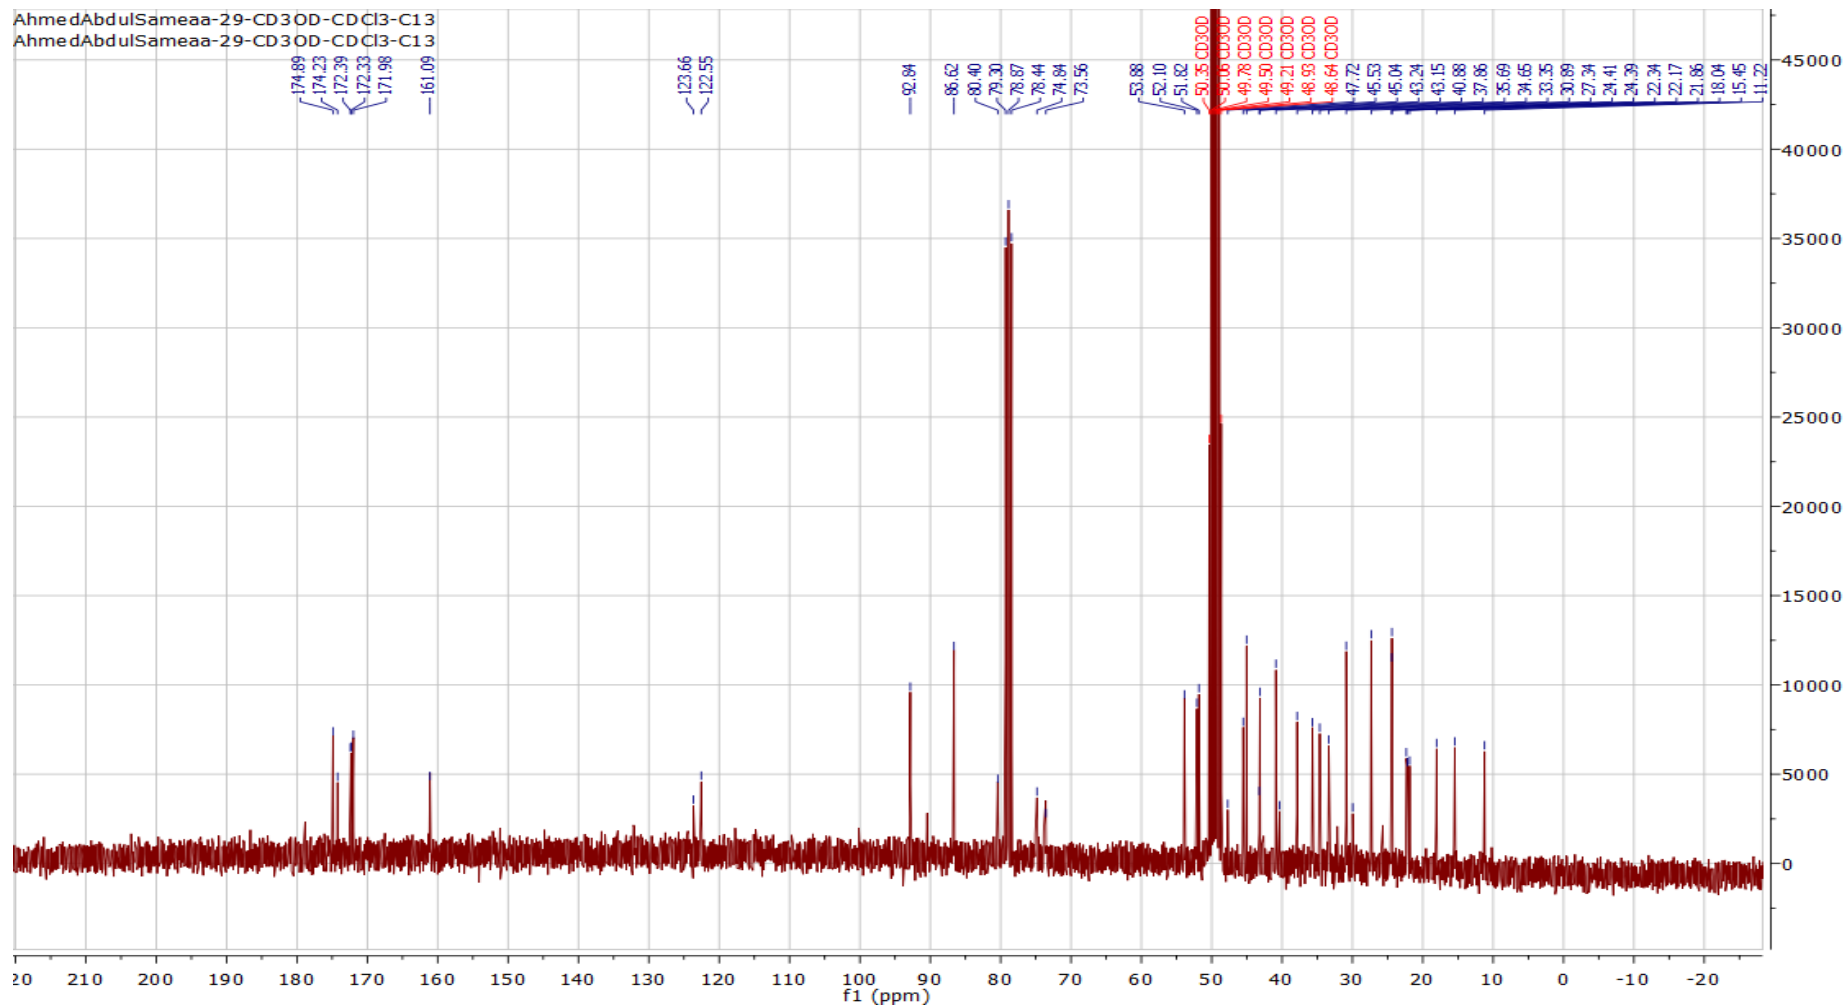

**Figure 19:  $^{13}\text{C}$ -NMR spectrum of compound 3 (75 MHz,  $\text{CDCl}_3\text{-CD}_3\text{OD}$ )**





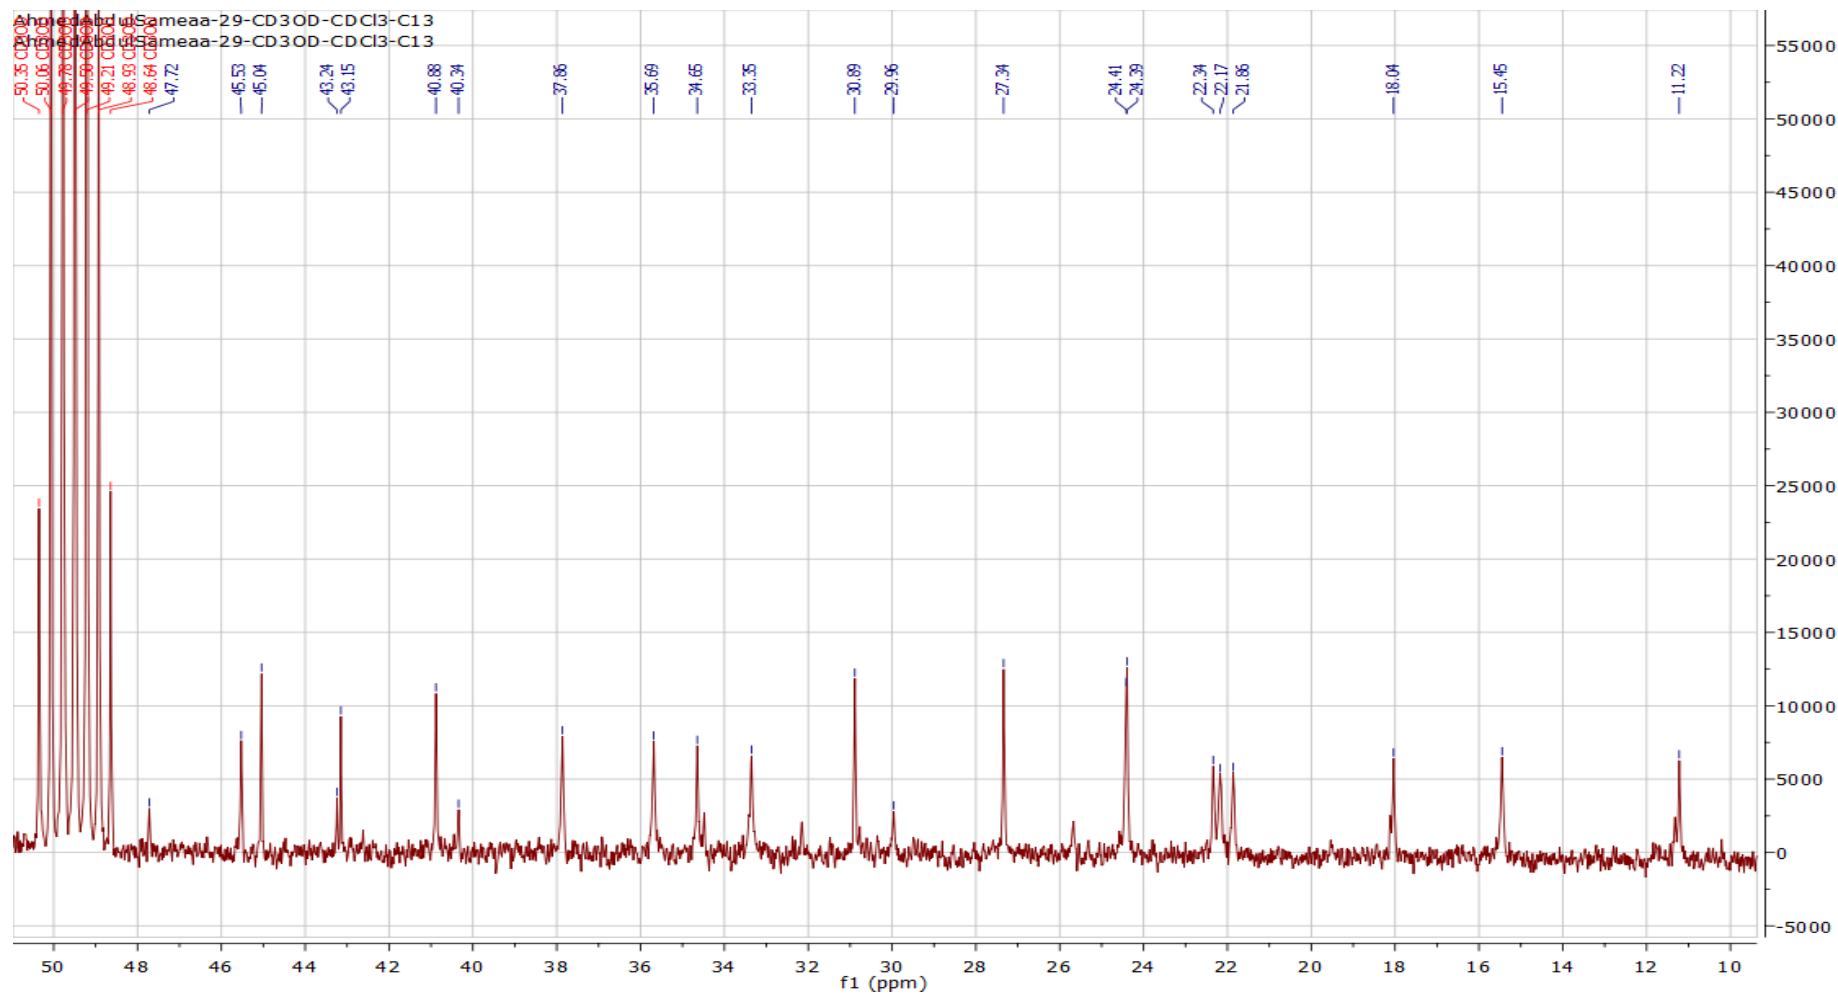

**Figure 20: Partial expansion of  $^{13}\text{C}$ -NMR spectrum of compound 3 (75 MHz,  $\text{CDCl}_3\text{-CD}_3\text{OD}$ )**

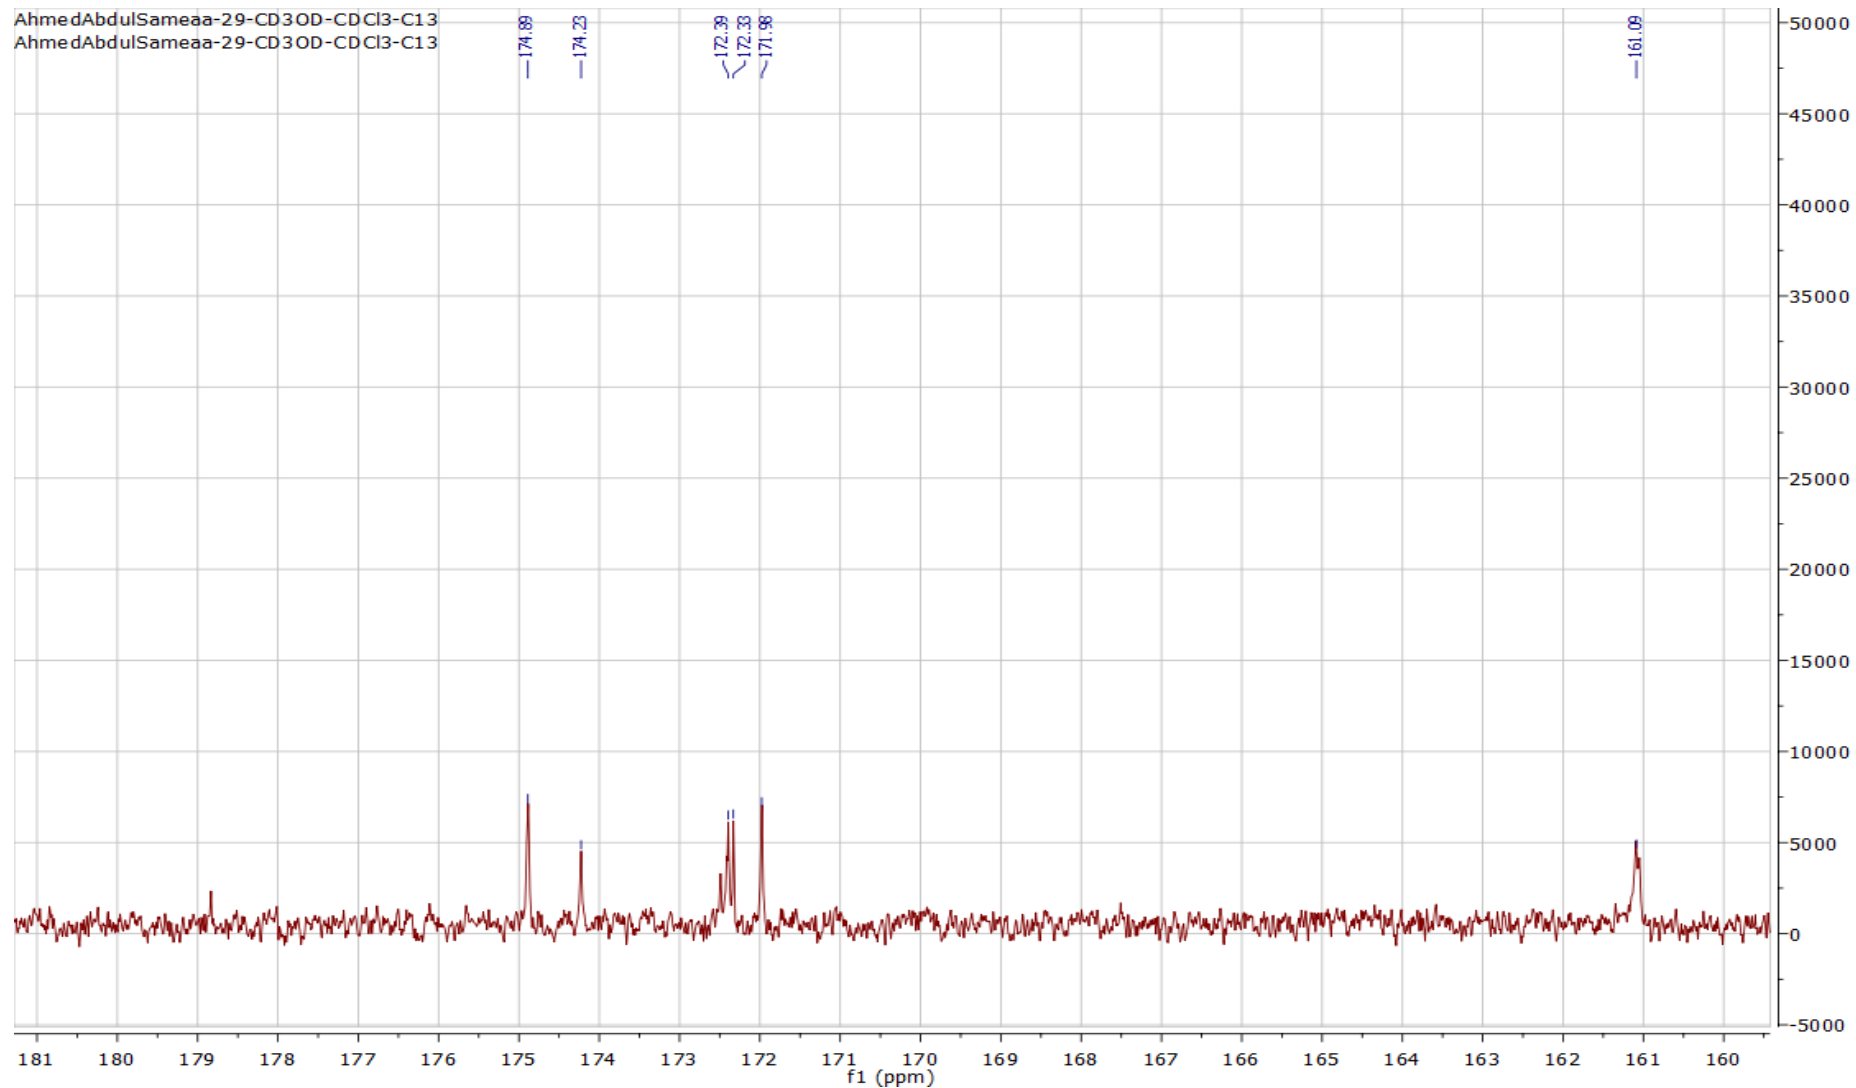

**Figure 21: Partial expansion of <sup>13</sup>C-NMR spectrum of compound 3 (75 MHz, CDCl<sub>3</sub>-CD<sub>3</sub>OD)**

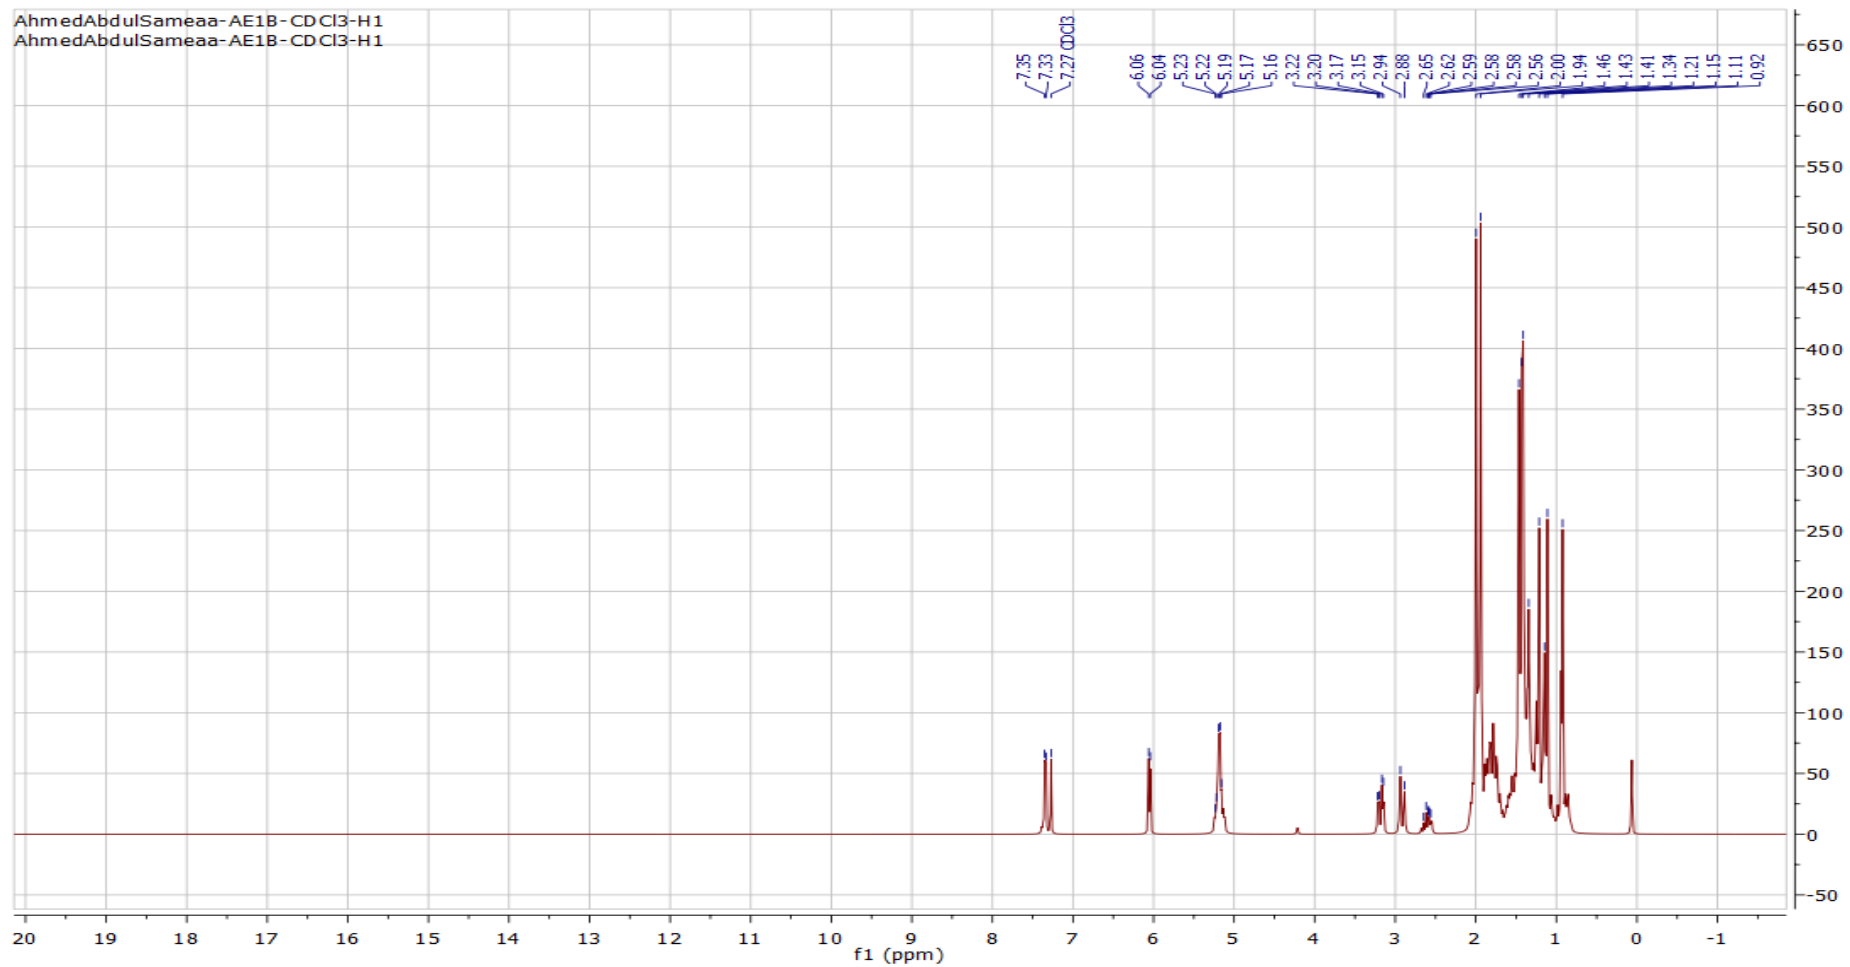

Figure 22: <sup>1</sup>H -NMR spectrum of compound 4 (300 MHz, CDCl<sub>3</sub>)

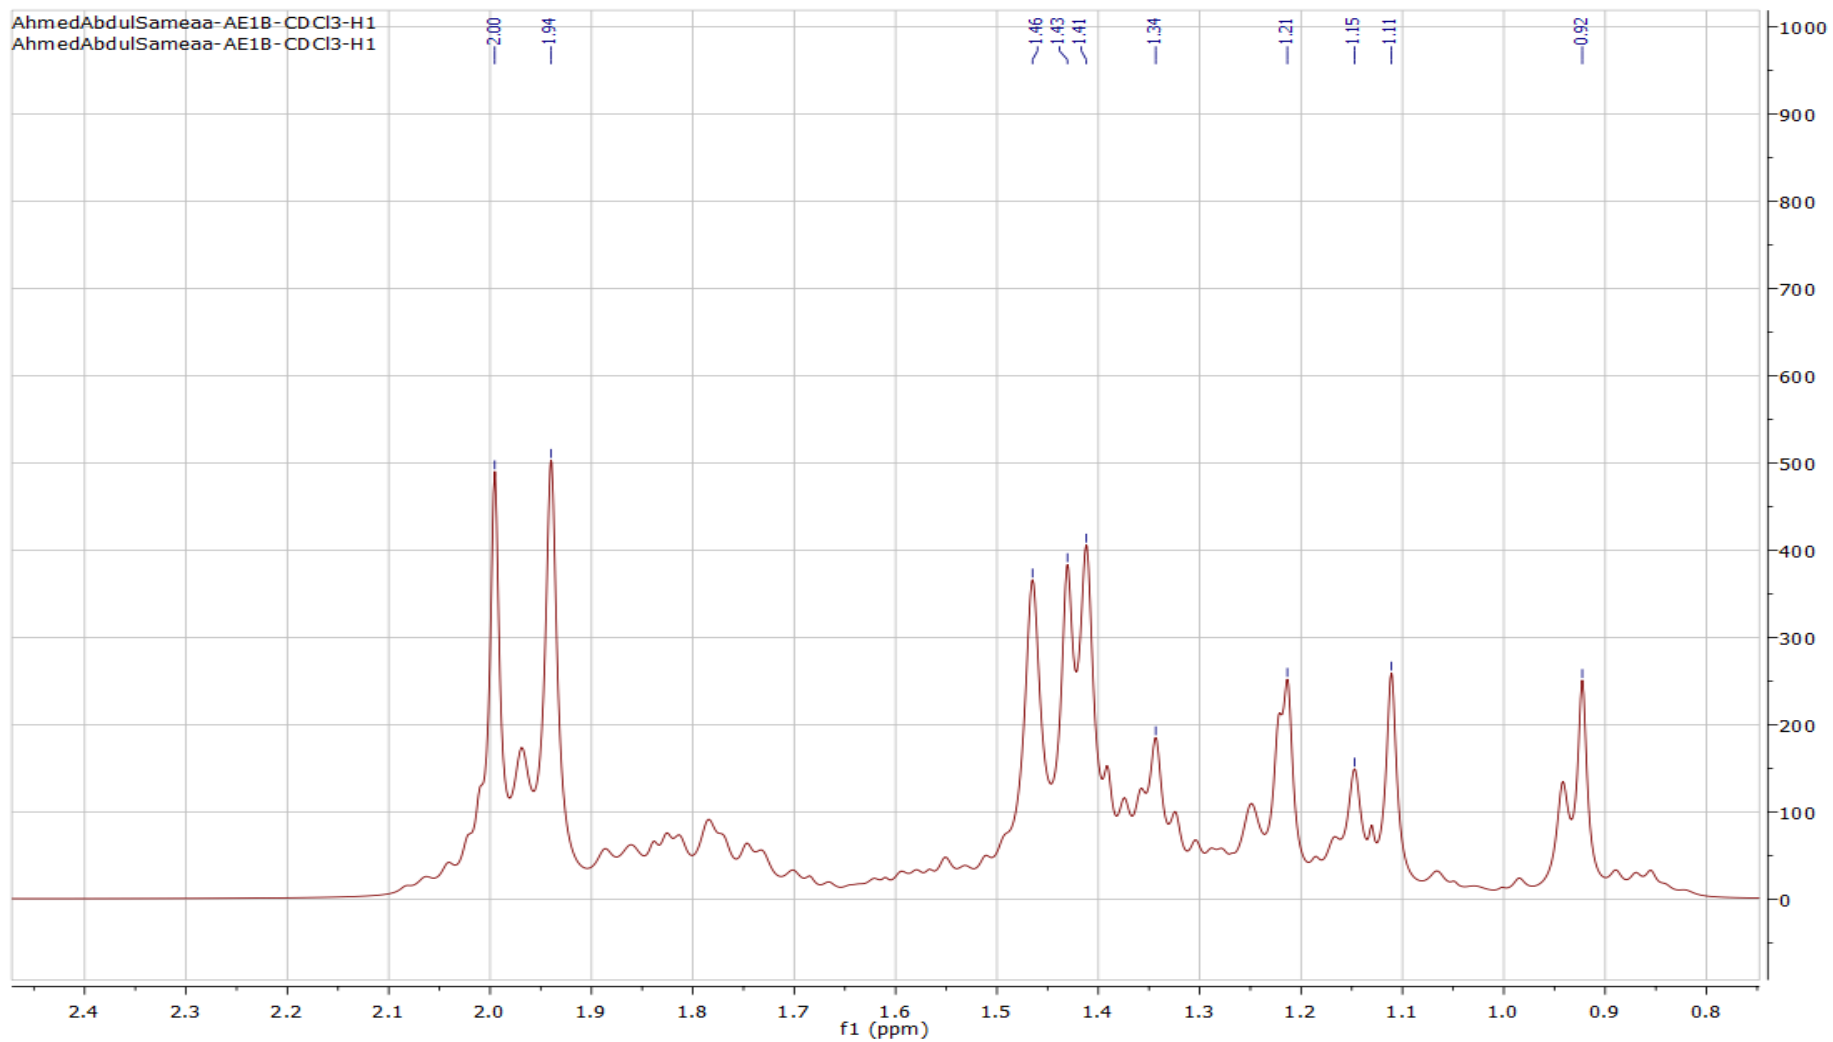

**Figure 23: Partial expansion of <sup>1</sup>H -NMR spectrum of compound 4 (300 MHz, CDCl<sub>3</sub>)**

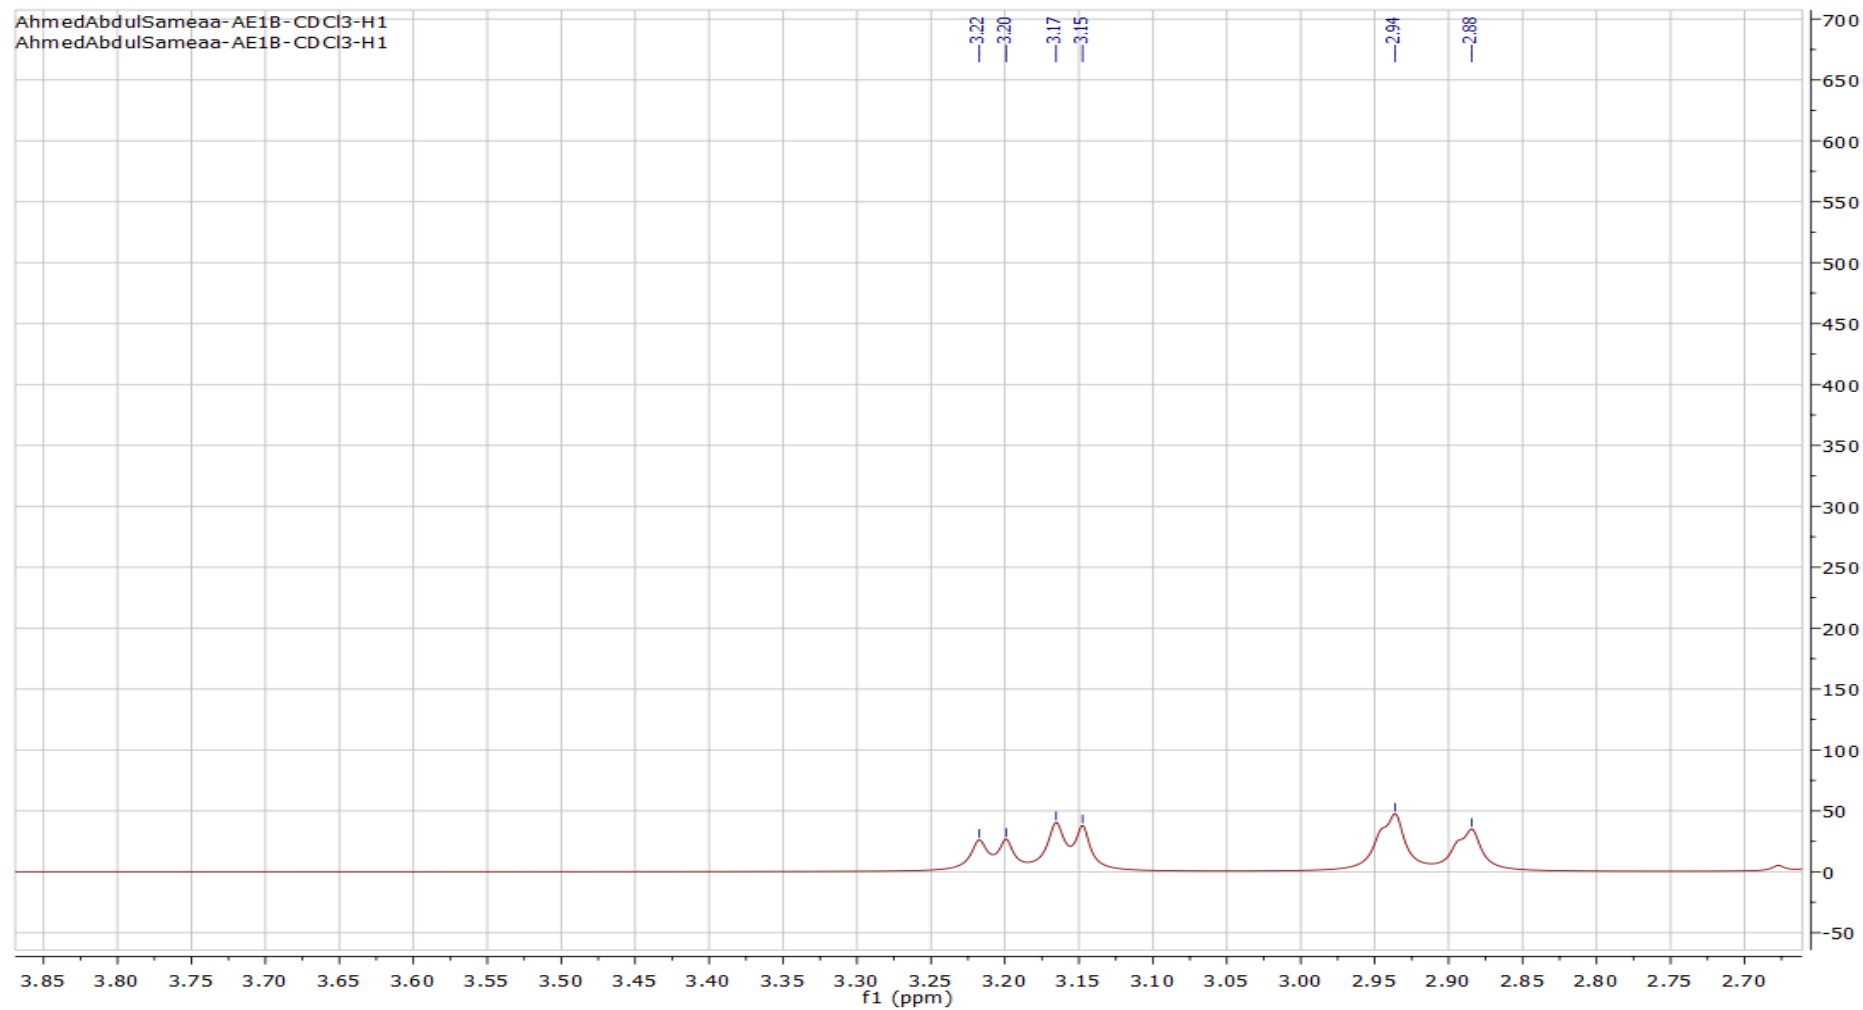

**Figure 24: Partial expansion of  $^1\text{H}$ -NMR spectrum of compound 4 (300 MHz,  $\text{CDCl}_3$ )**

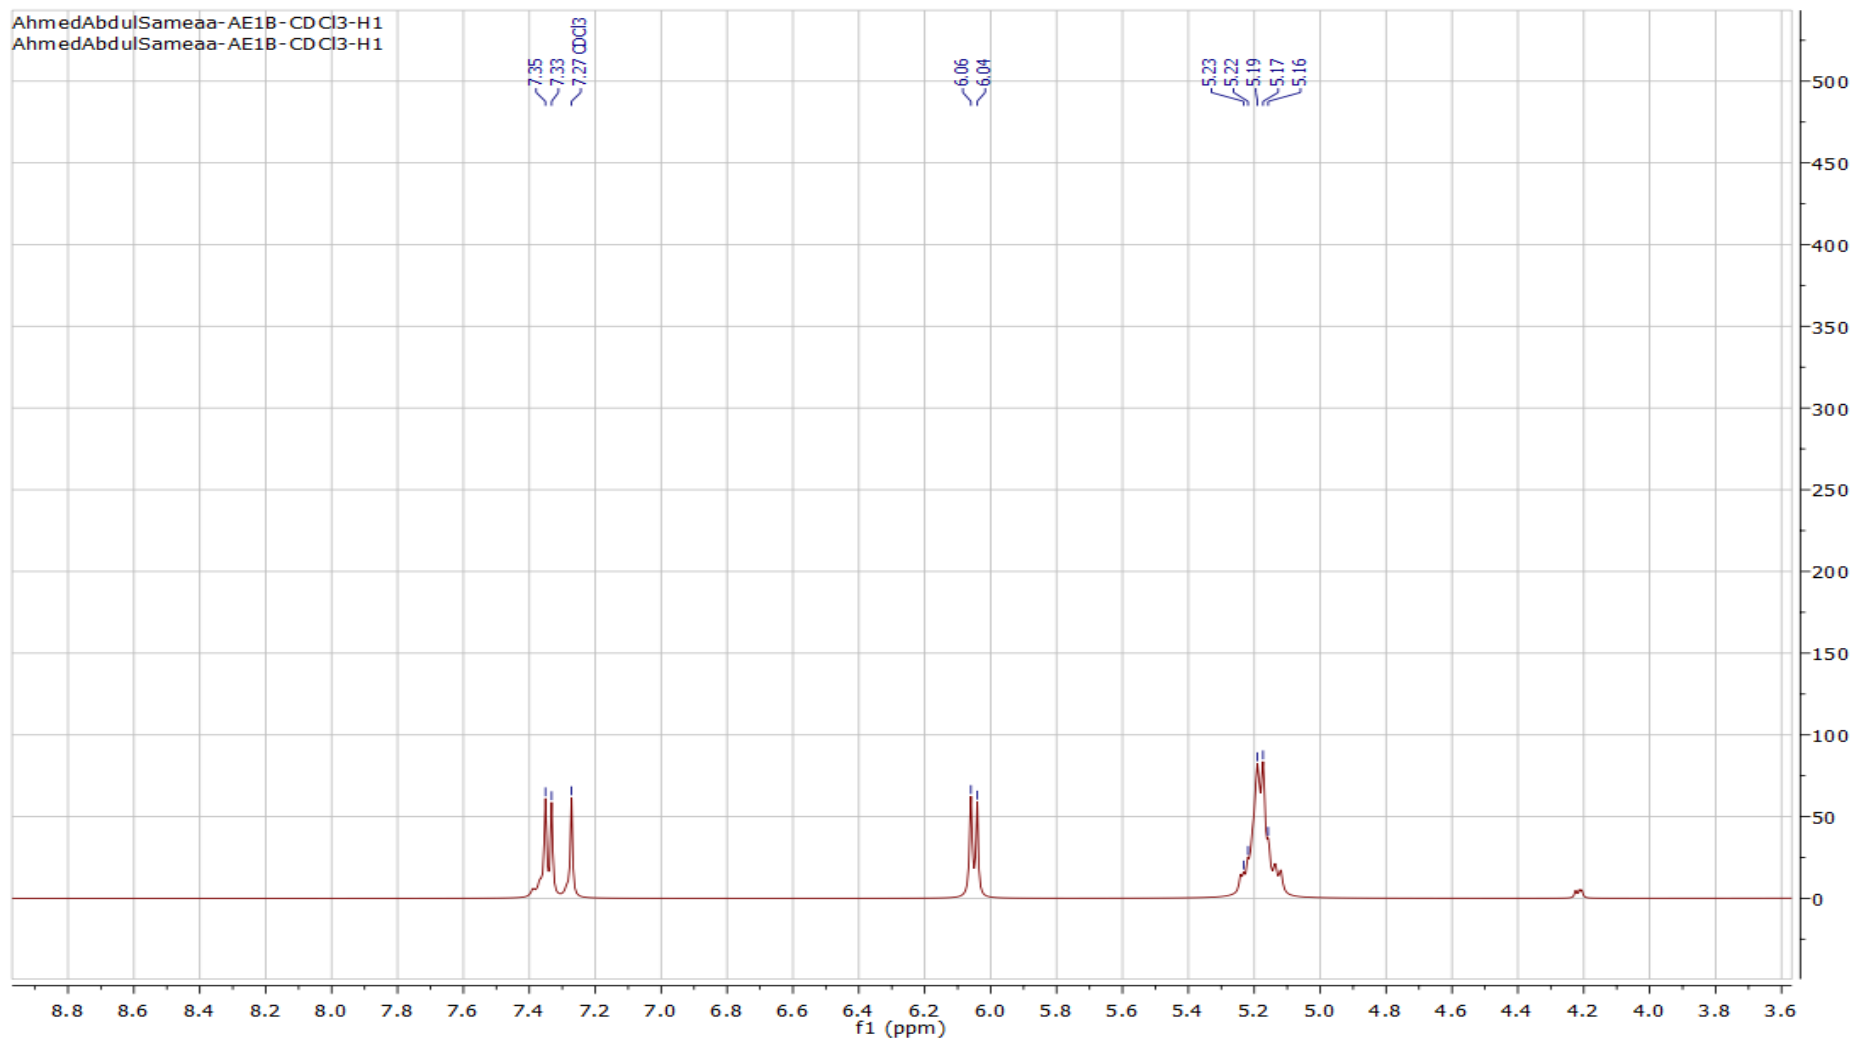

Figure 25: Partial expansion of  $^1\text{H}$ -NMR spectrum of compound 4 (300 MHz,  $\text{CDCl}_3$ )

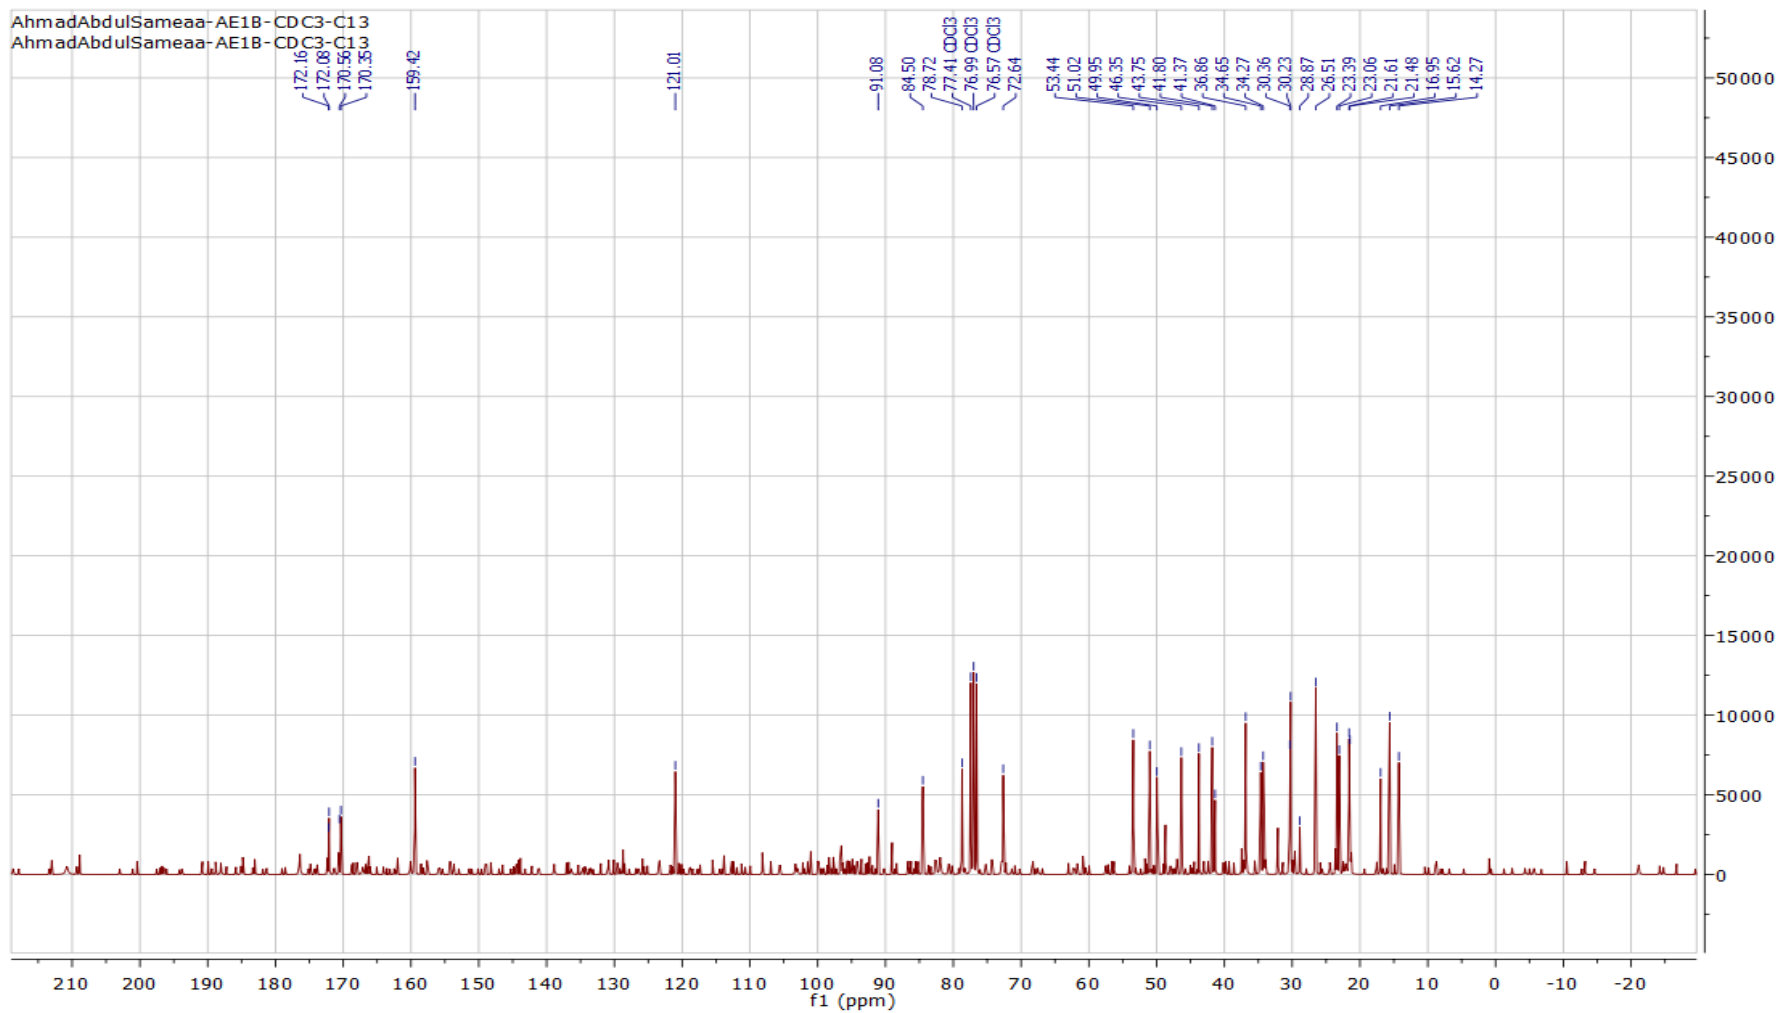

Figure 26:  $^{13}\text{C}$ -NMR spectrum of compound 4 (75 MHz,  $\text{CDCl}_3$ )



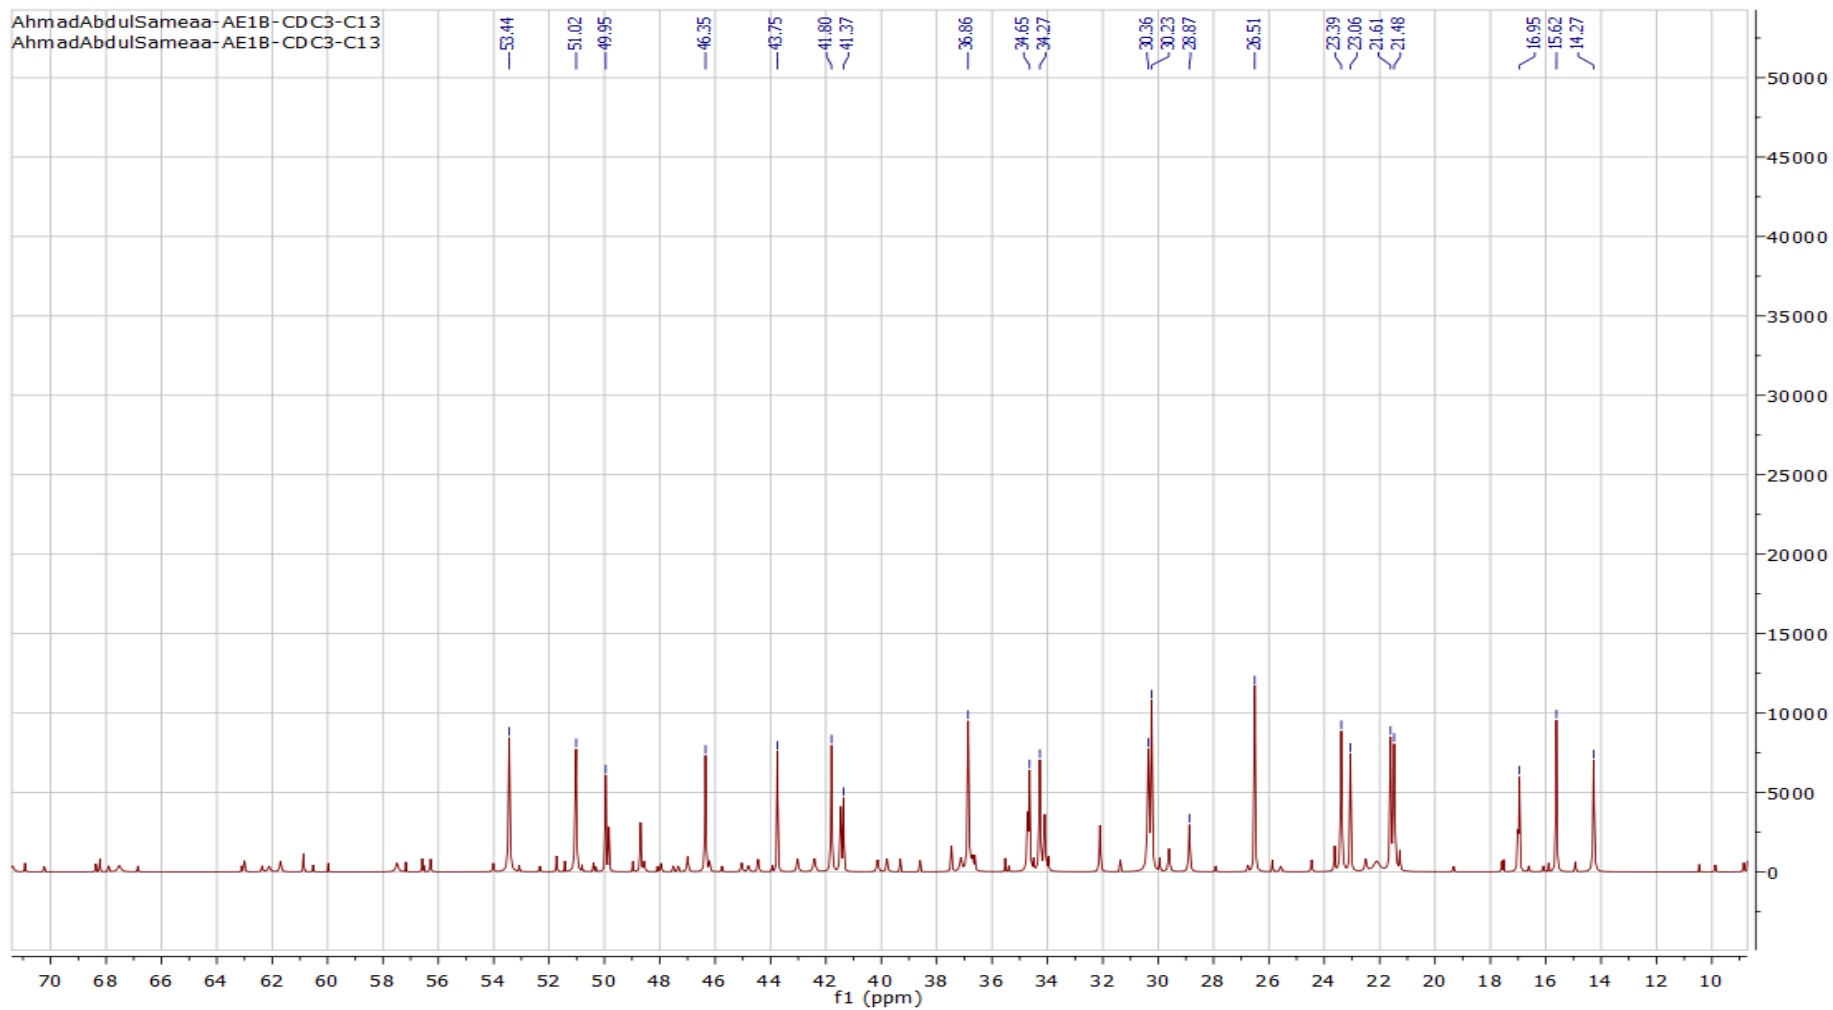

**Figure 27: Partial expansion of  $^{13}\text{C}$  -NMR spectrum of compound 4 (75 MHz,  $\text{CDCl}_3$ )**

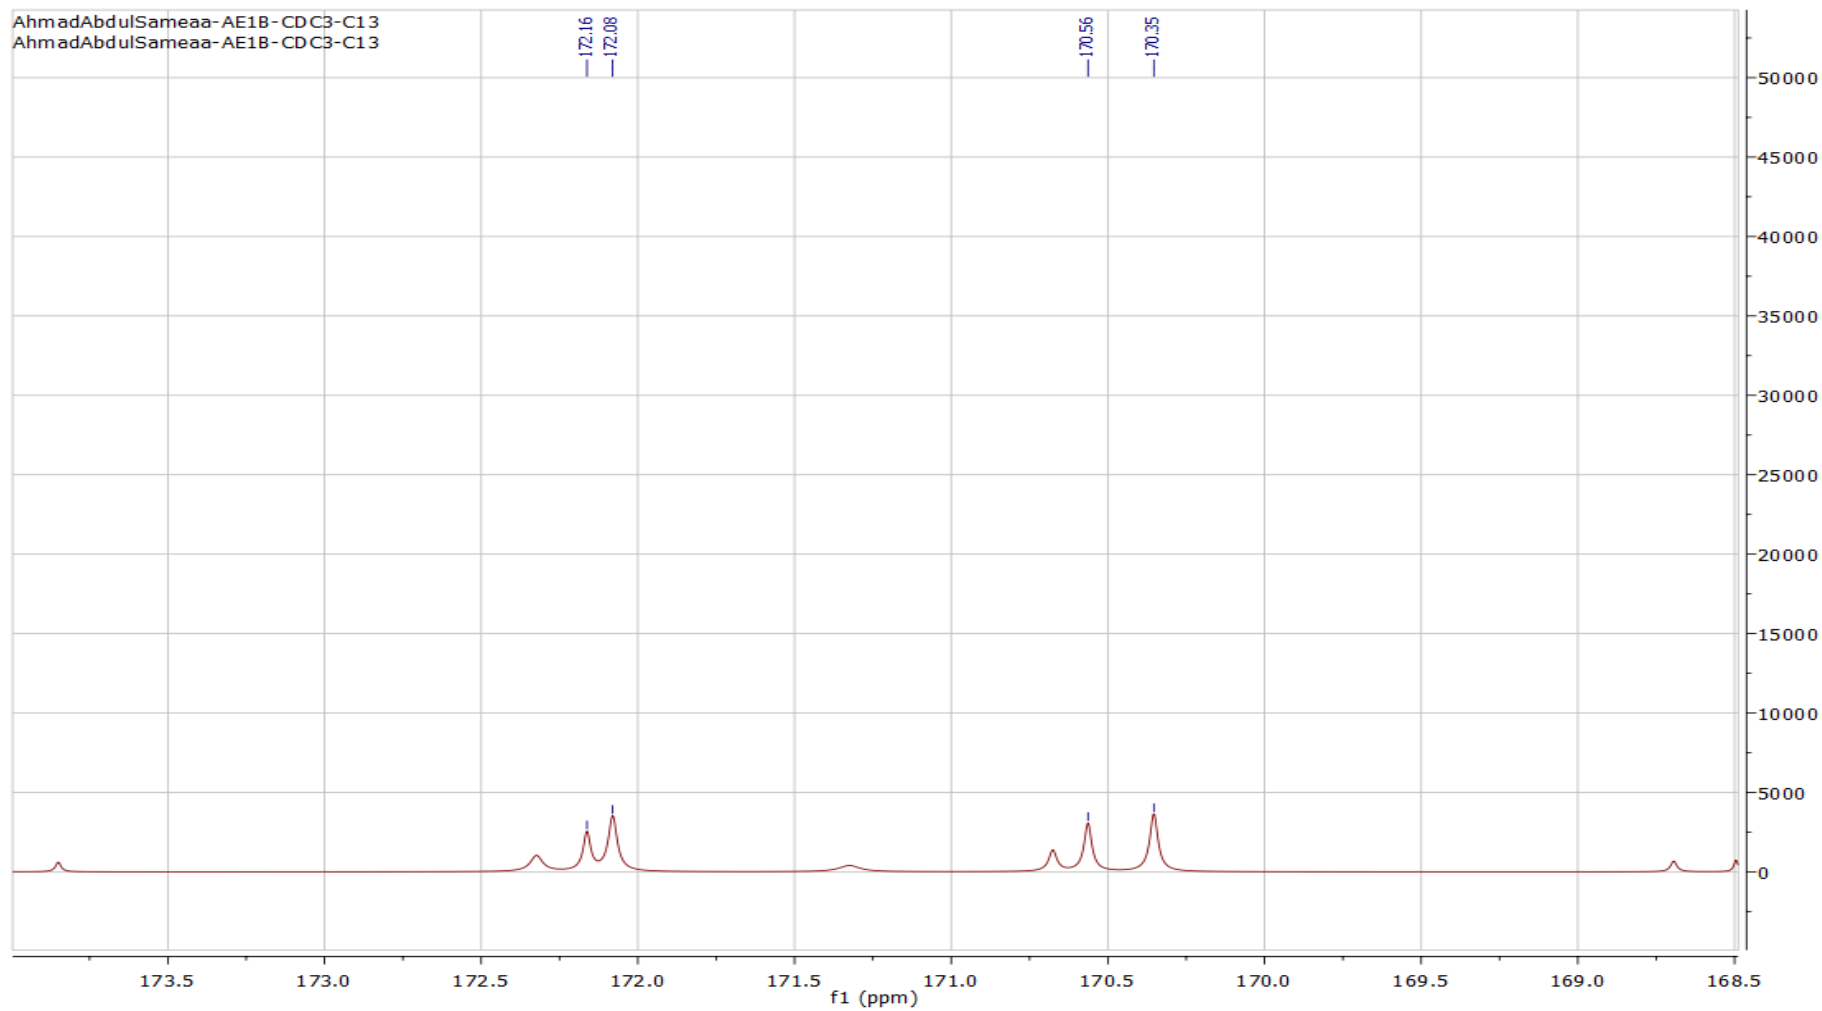

**Figure 28: Partial expansion of <sup>13</sup>C -NMR spectrum of compound 4 (75 MHz, CDCl<sub>3</sub>)**

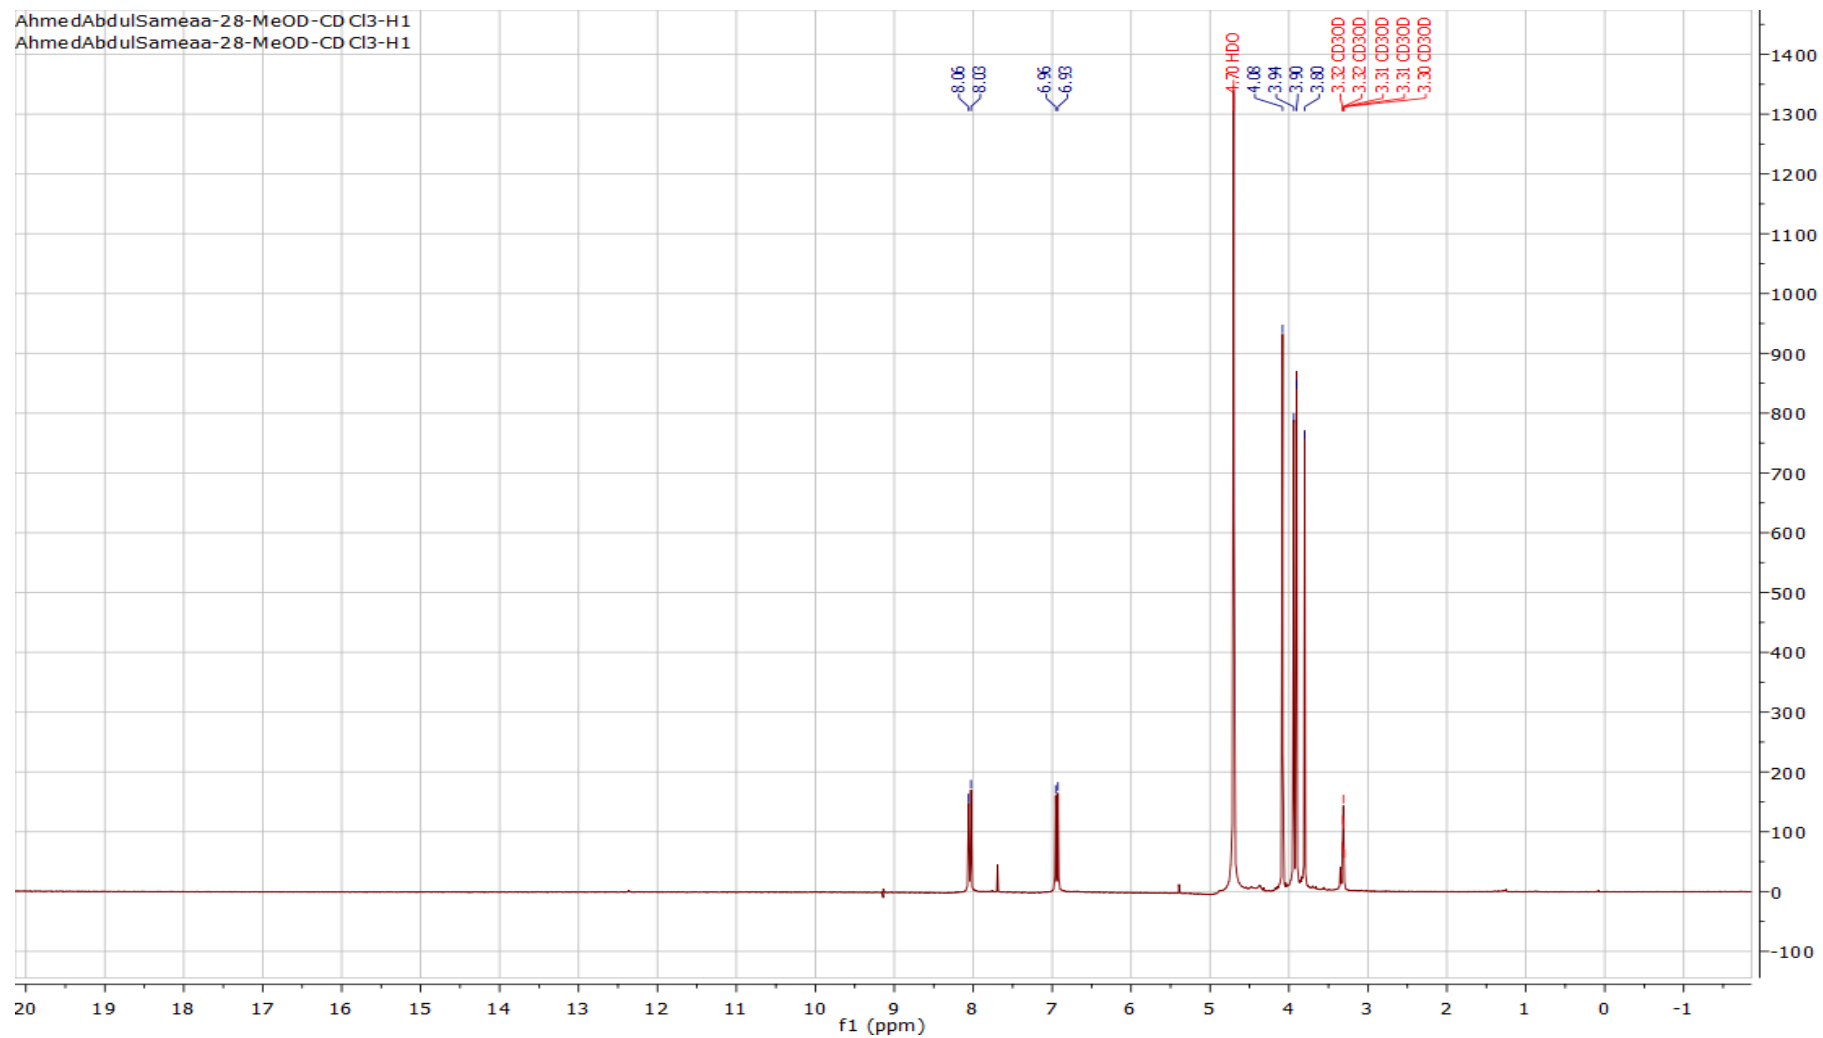

**Figure 29: <sup>1</sup>H-NMR spectrum of compound 5 (300 MHz, CDCl<sub>3</sub>-CD<sub>3</sub>OD)**

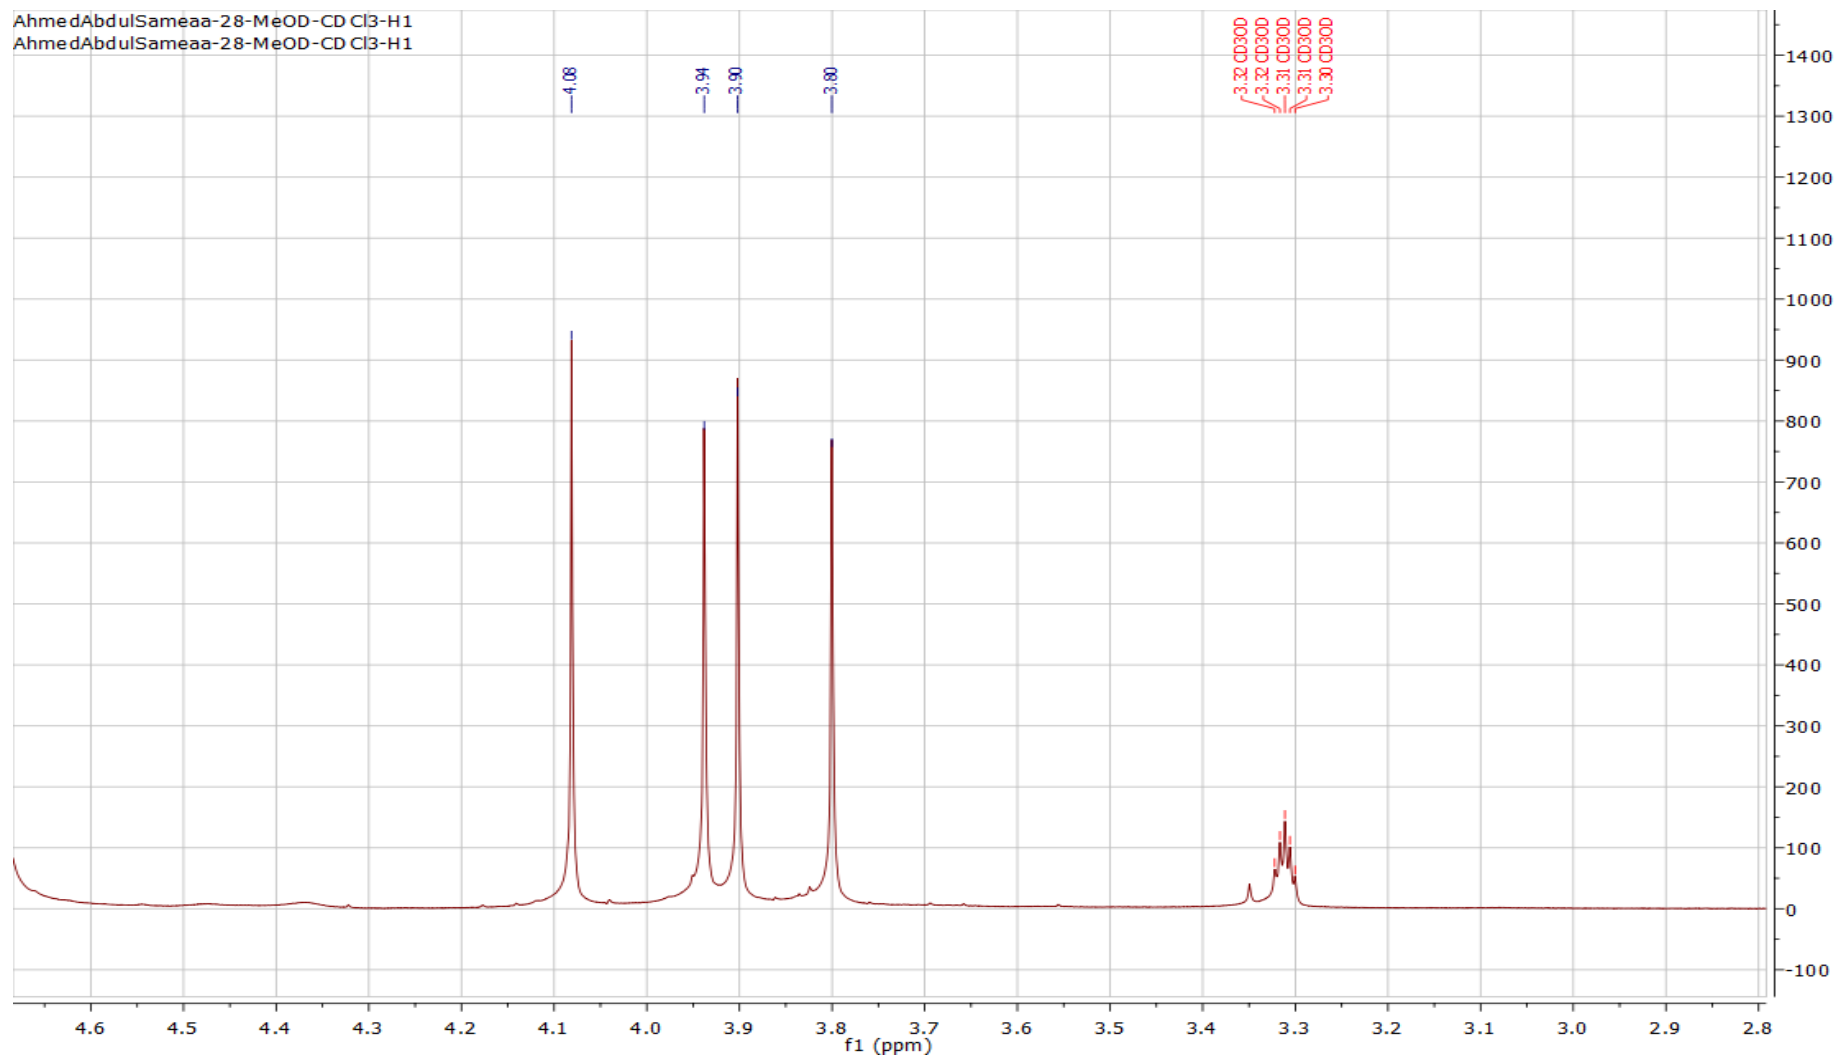

**Figure 30: Partial expansion of  $^1\text{H}$ -NMR spectrum of compound 5 (300 MHz,  $\text{CDCl}_3\text{-CD}_3\text{OD}$ )**

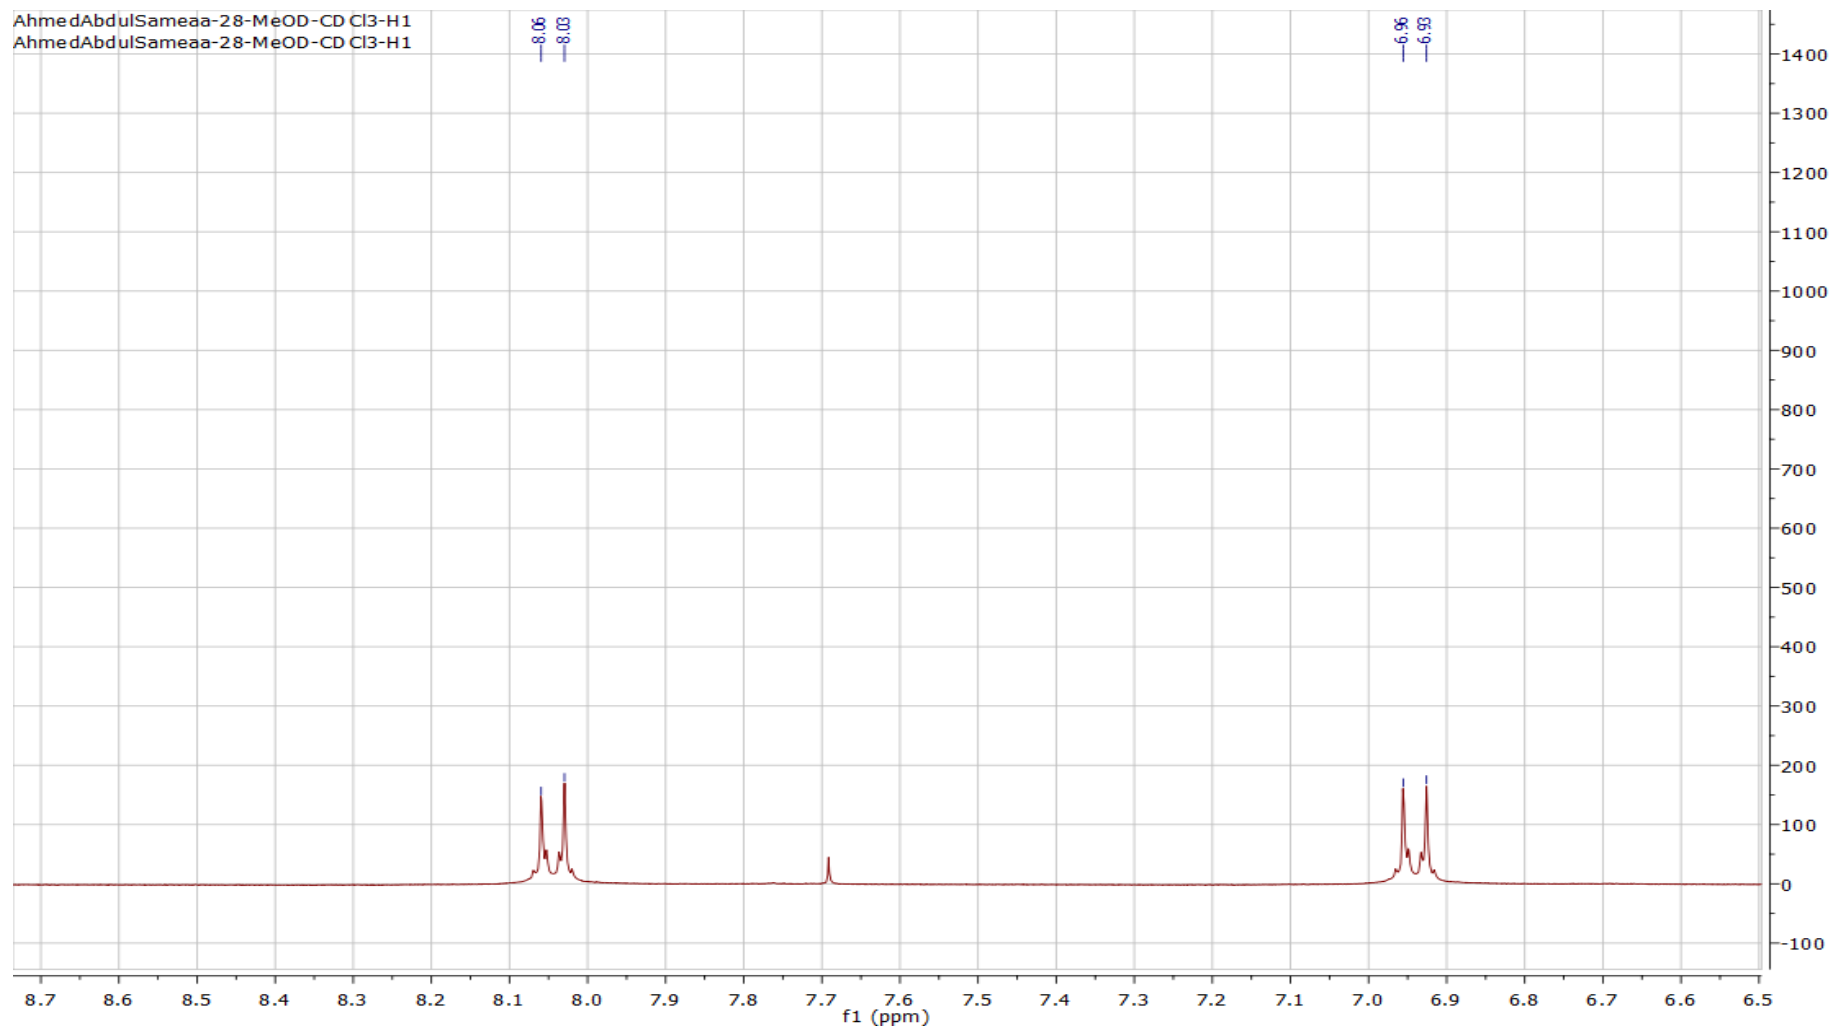

**Figure 31: Partial expansion of  $^1\text{H}$ -NMR spectrum of compound 5 (300 MHz,  $\text{CDCl}_3\text{-CD}_3\text{OD}$ )**

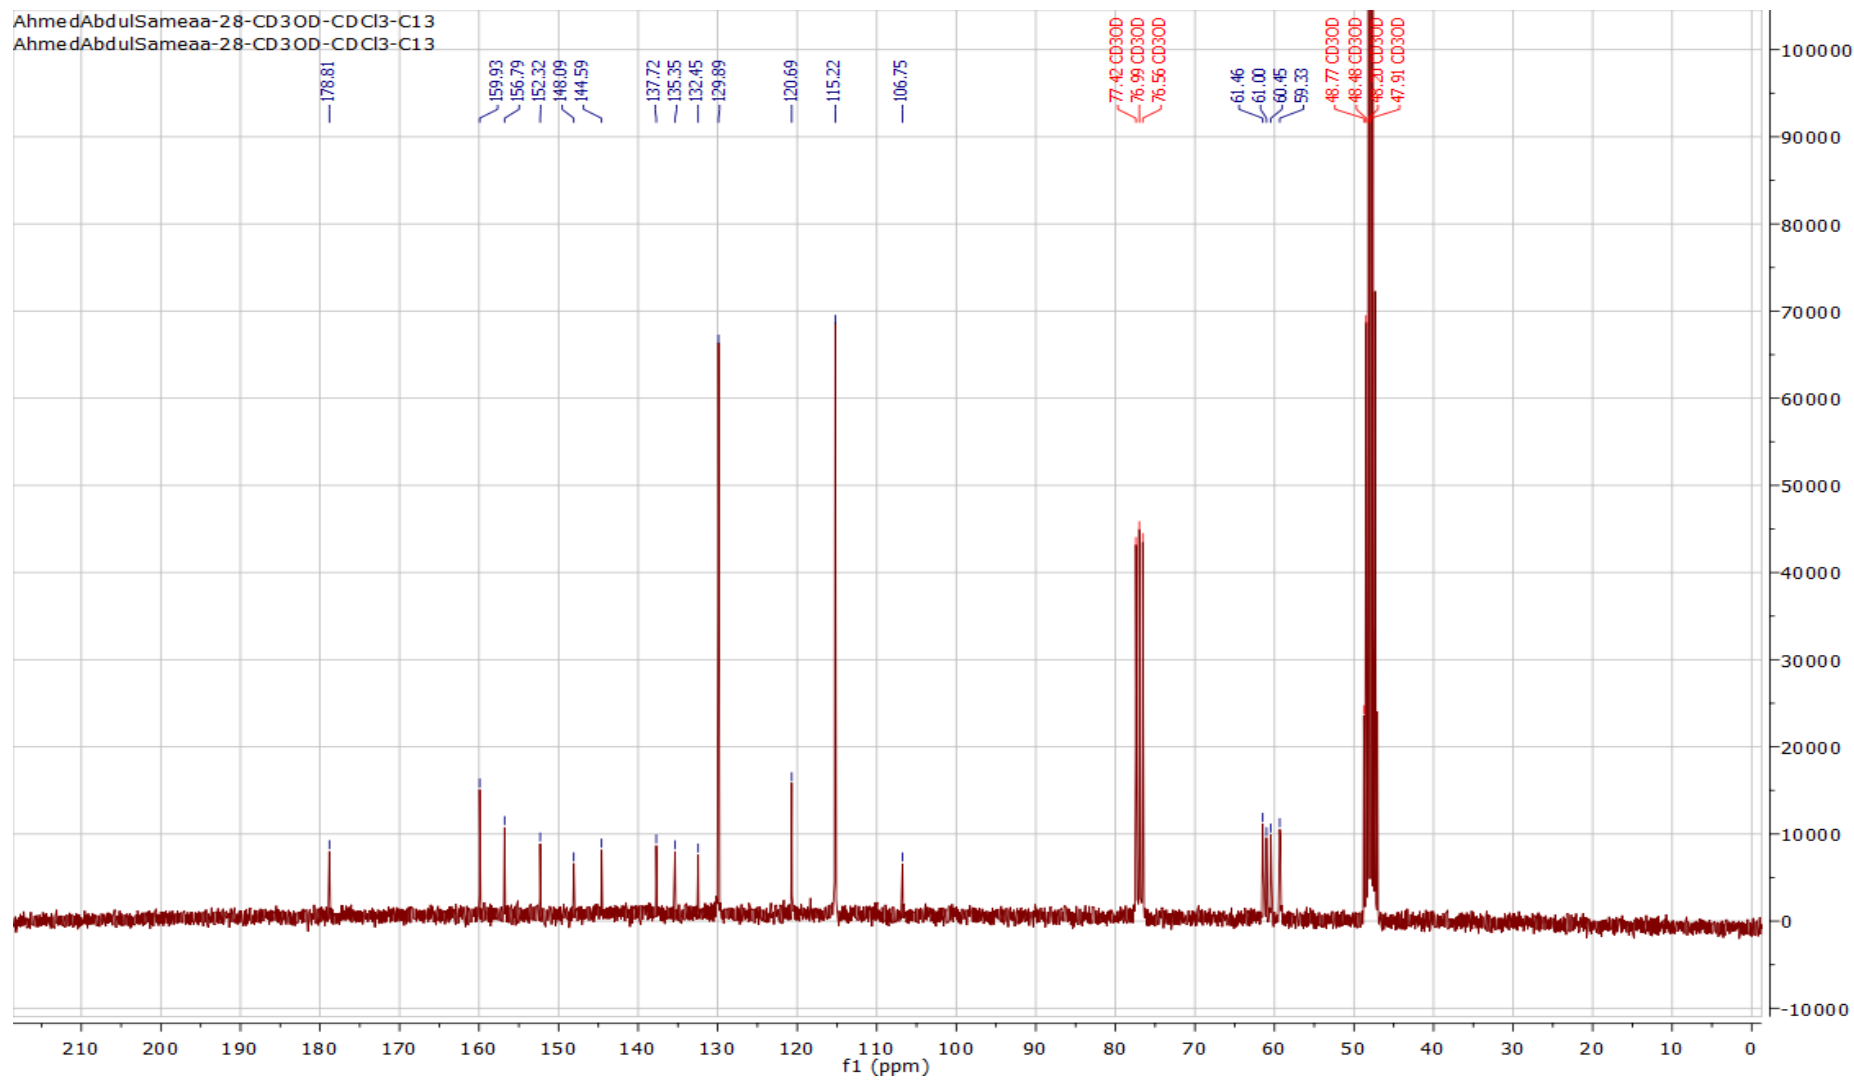

**Figure 32: <sup>13</sup>C-NMR spectrum of compound 5 (75 MHz, CDCl<sub>3</sub>-CD<sub>3</sub>OD)**

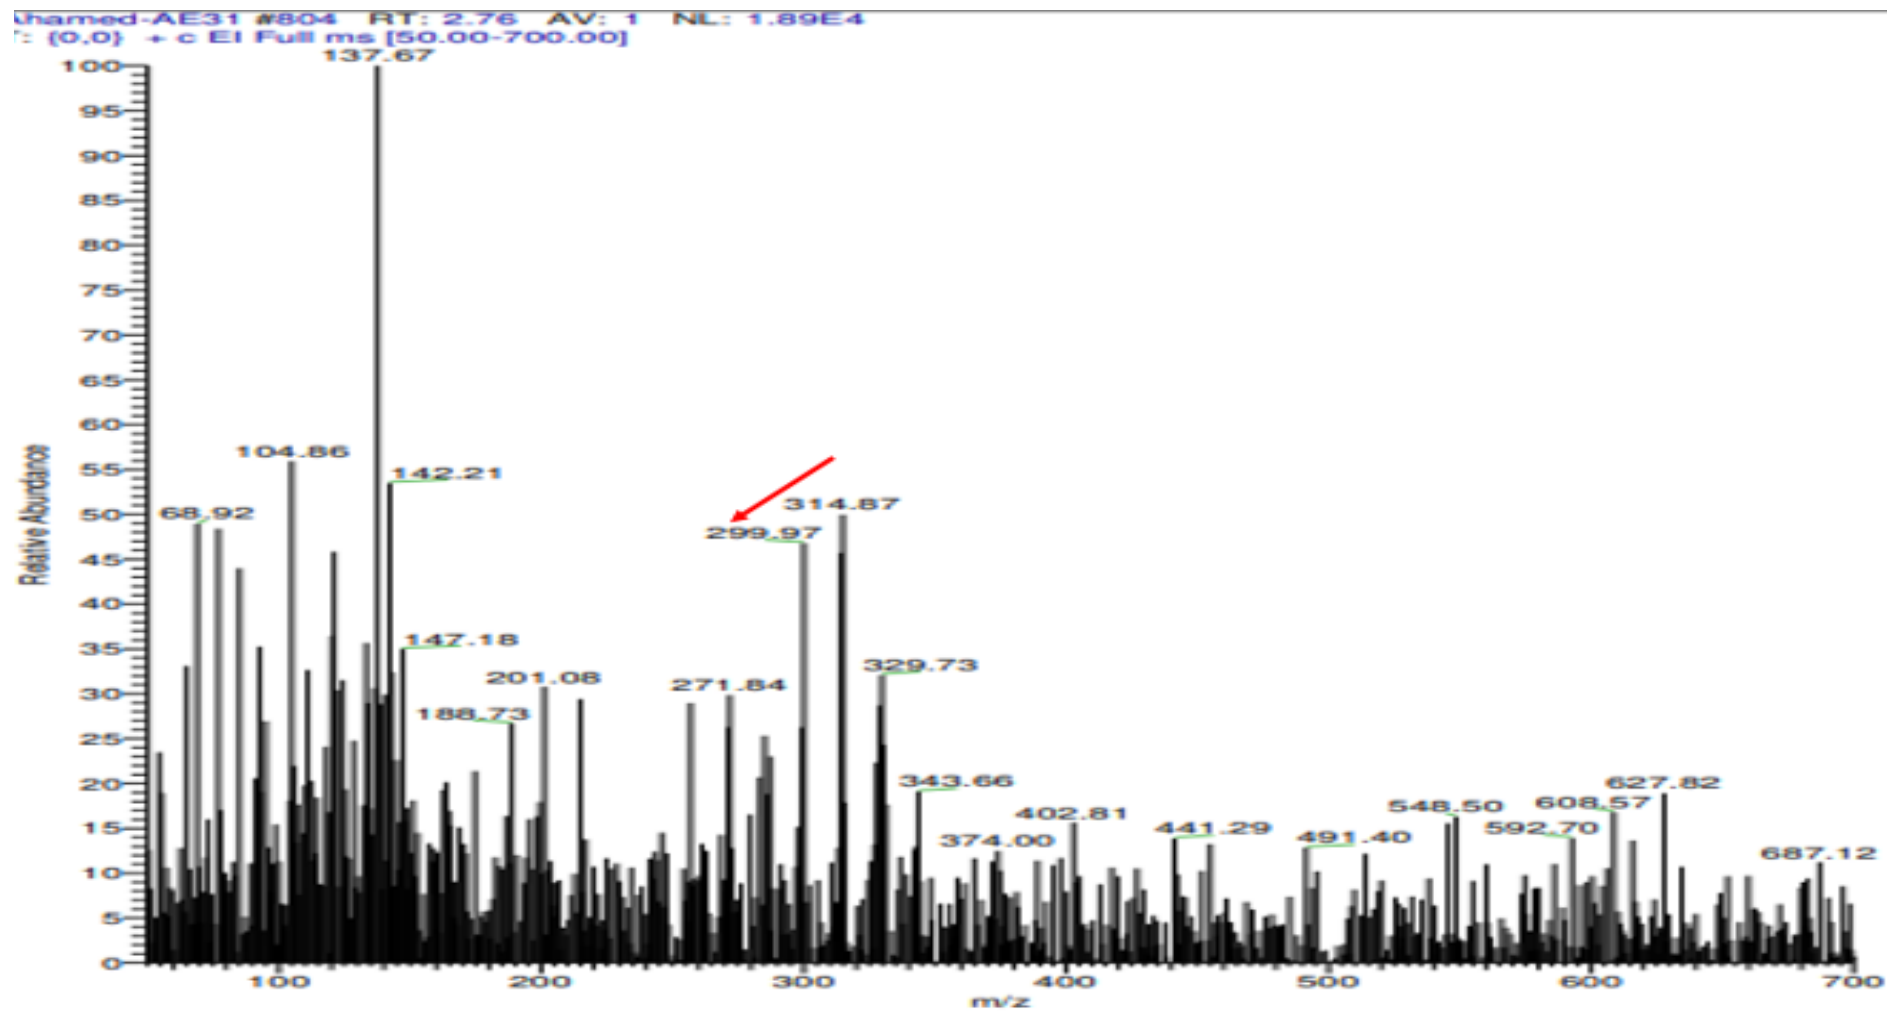

Figure 33: EI-MS of Compound 6

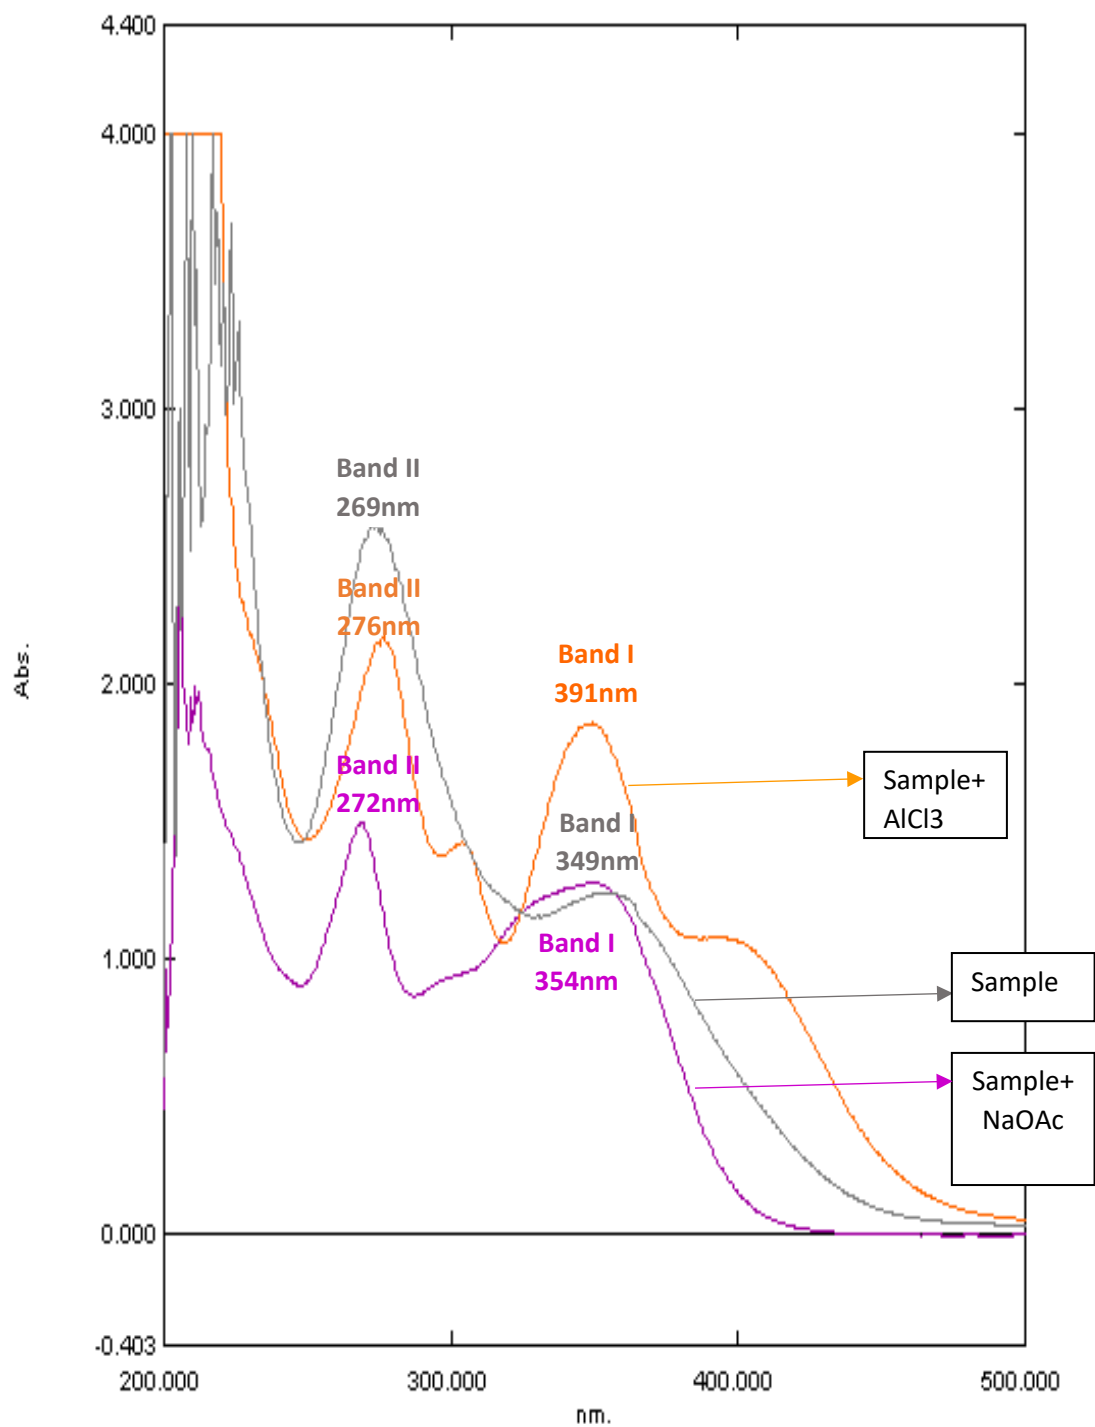

**Figure 34: UV-Vis spectrum analysis of Compound 6**



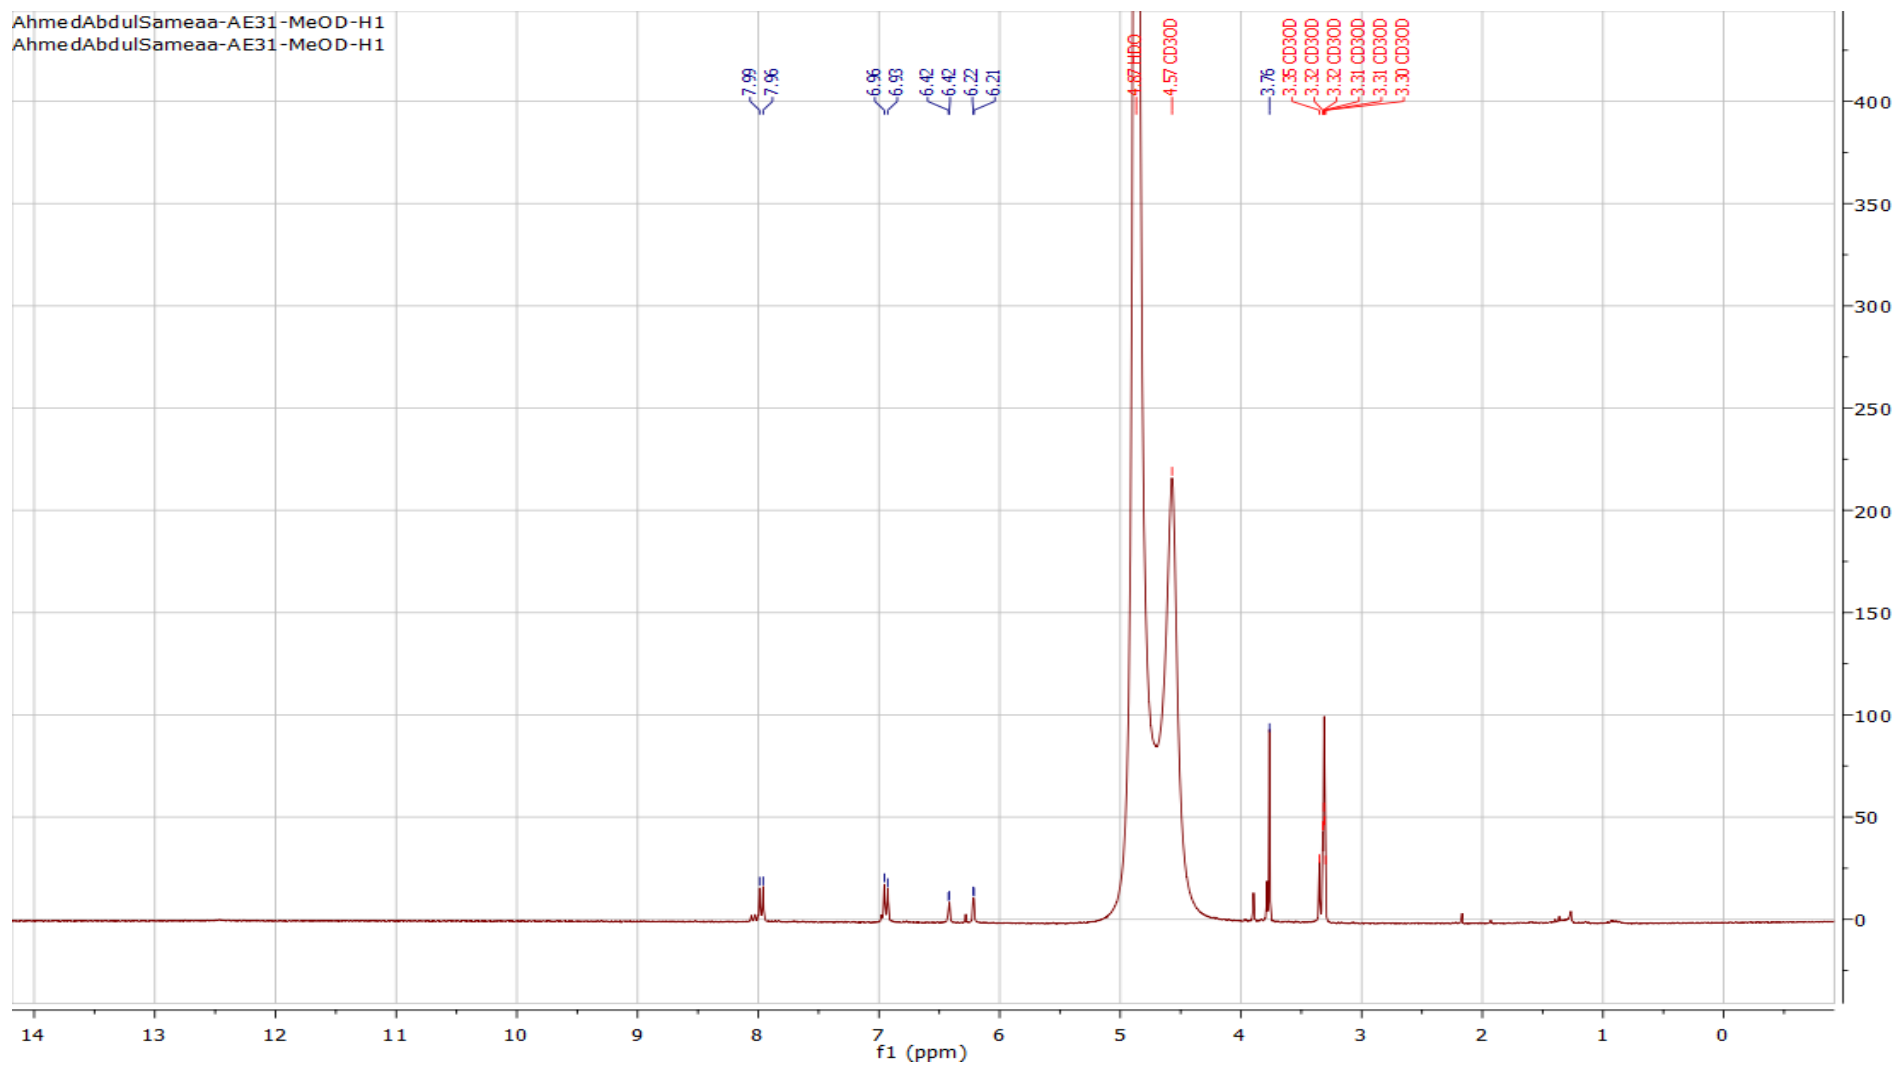

Figure 35:  $^1\text{H-NMR}$  spectrum of compound 6 (300 MHz,  $\text{CD}_3\text{OD}$ )

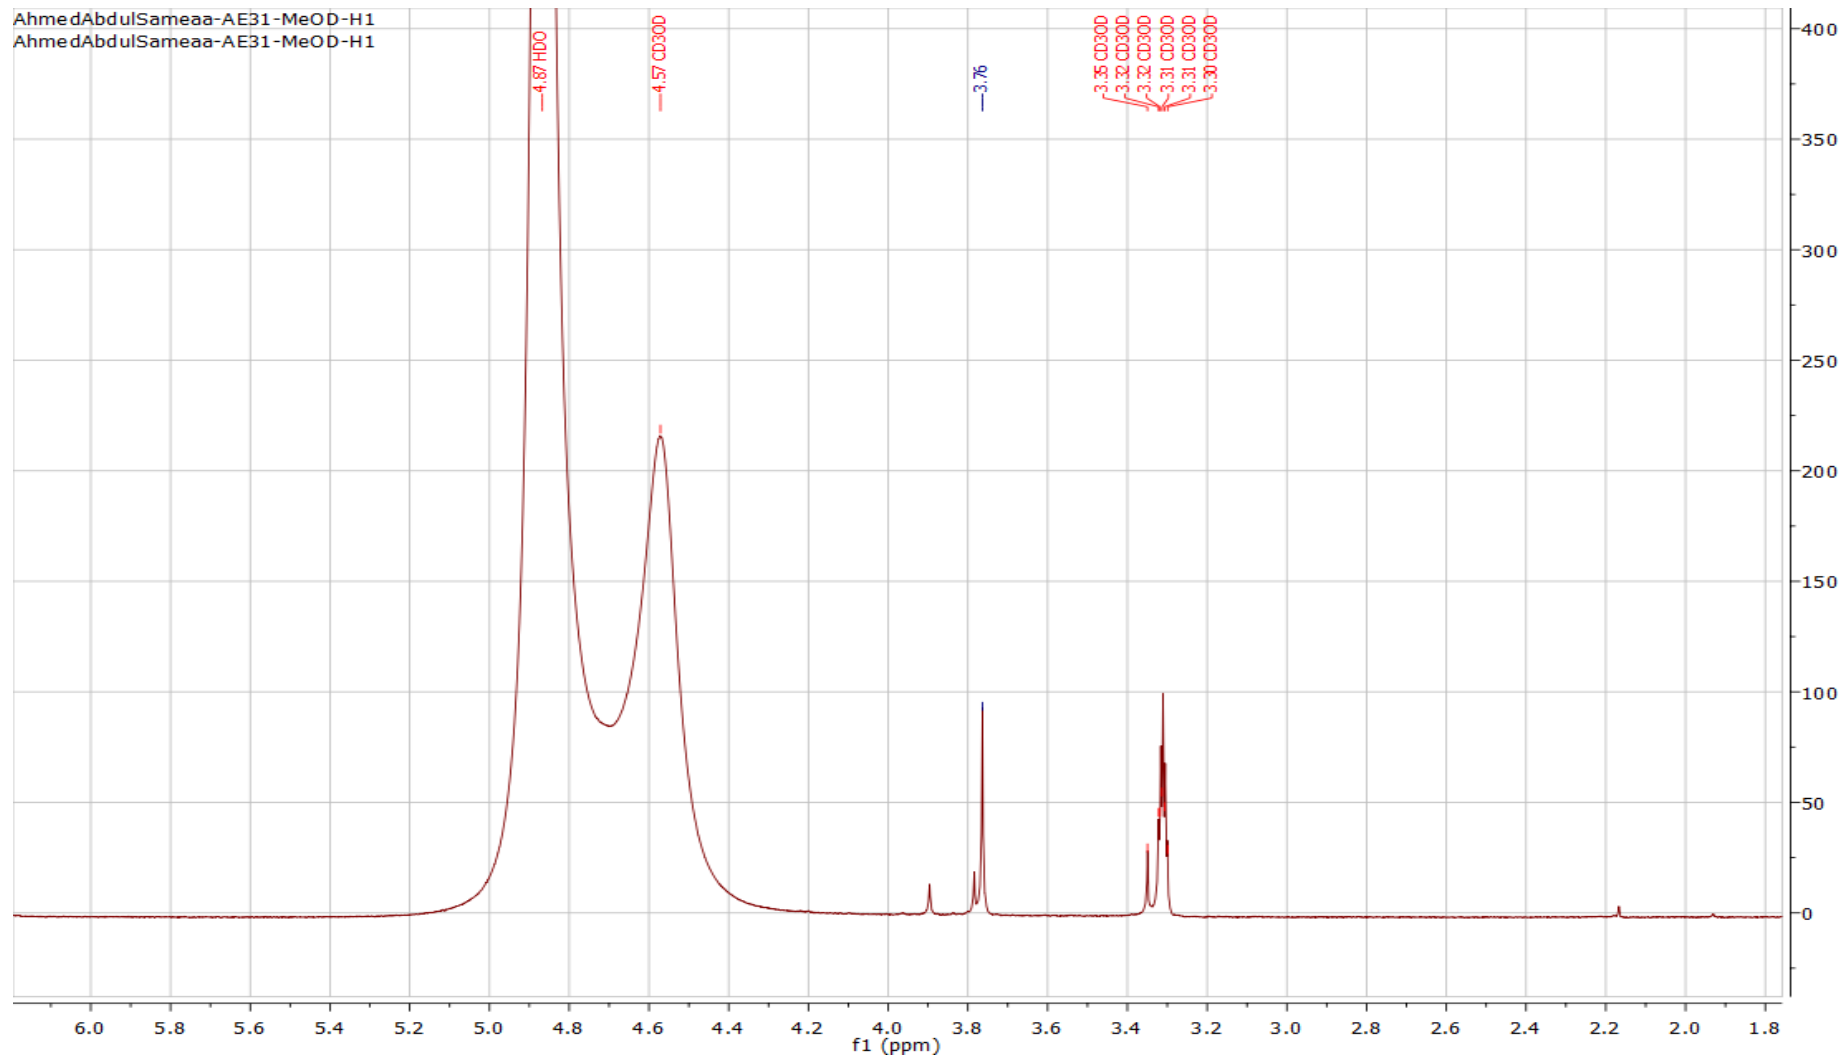

Figure 36: Partial expansion of <sup>1</sup>H-NMR spectrum of compound 6 (300 MHz, CD<sub>3</sub>OD)

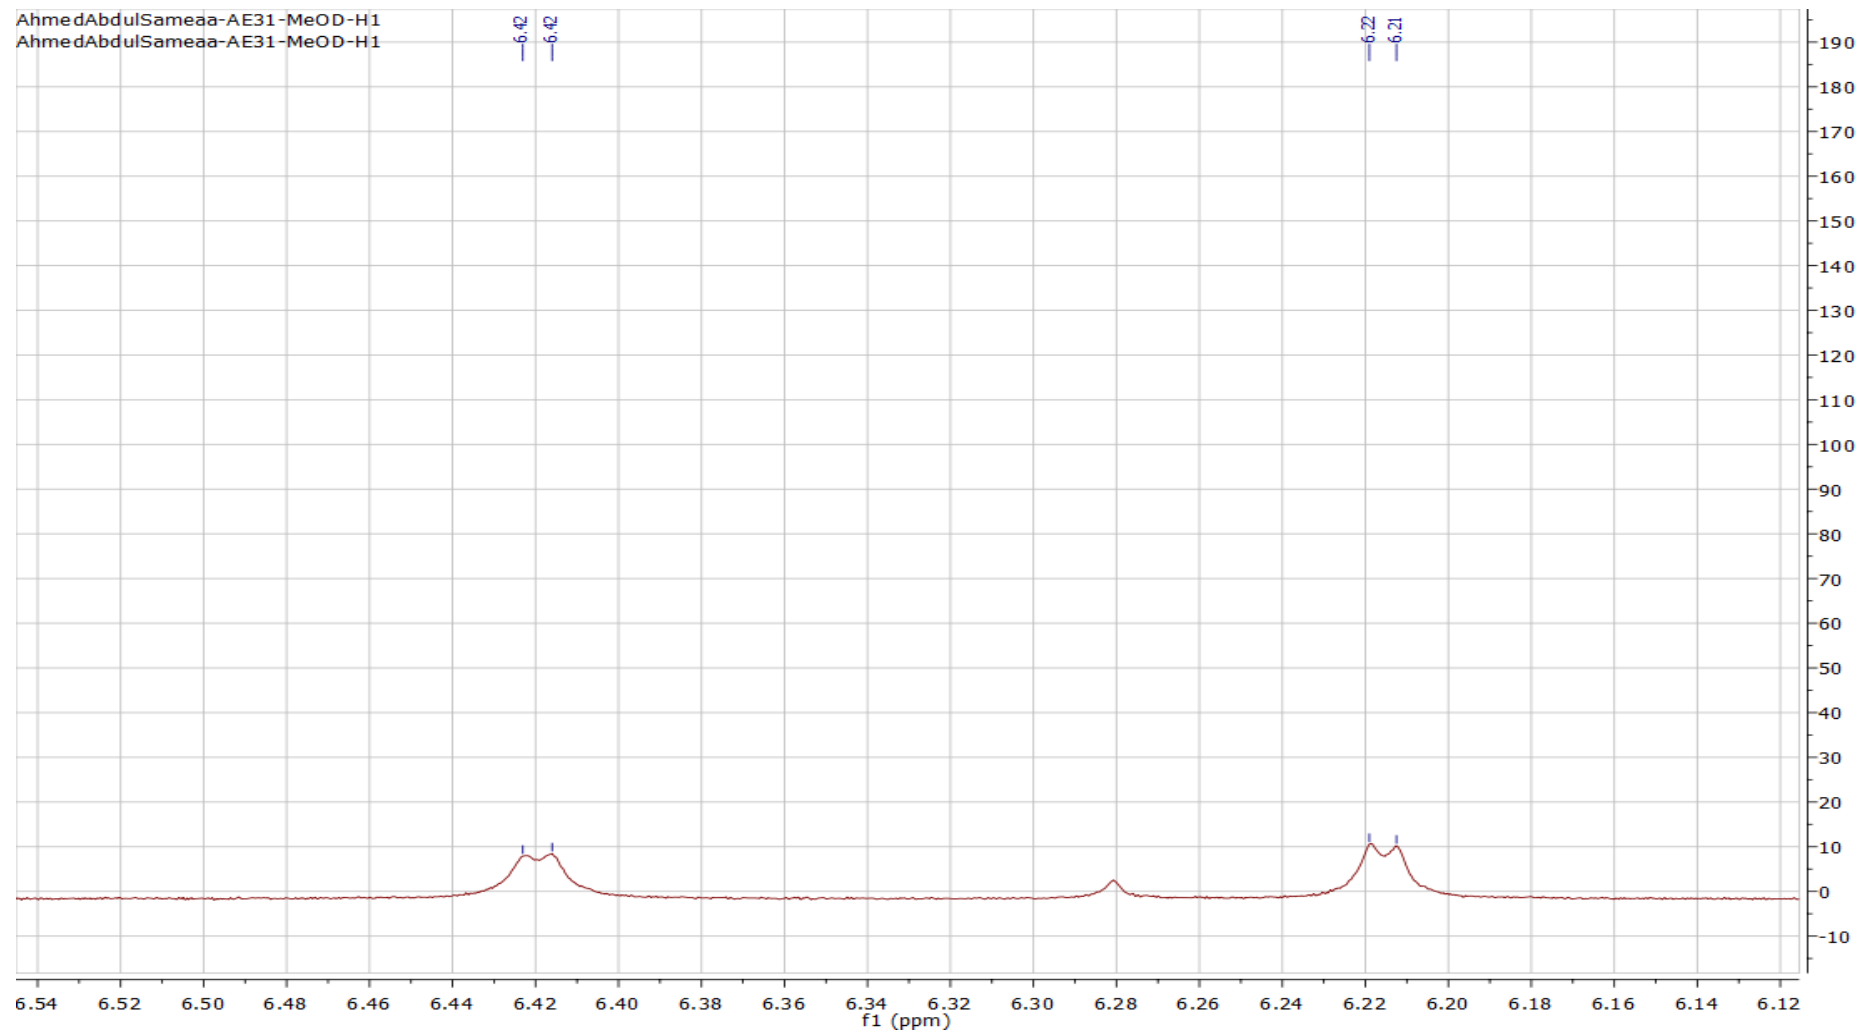

**Figure 37: Partial expansion of  $^1\text{H}$ -NMR spectrum of compound 6 (300 MHz,  $\text{CD}_3\text{OD}$ )**

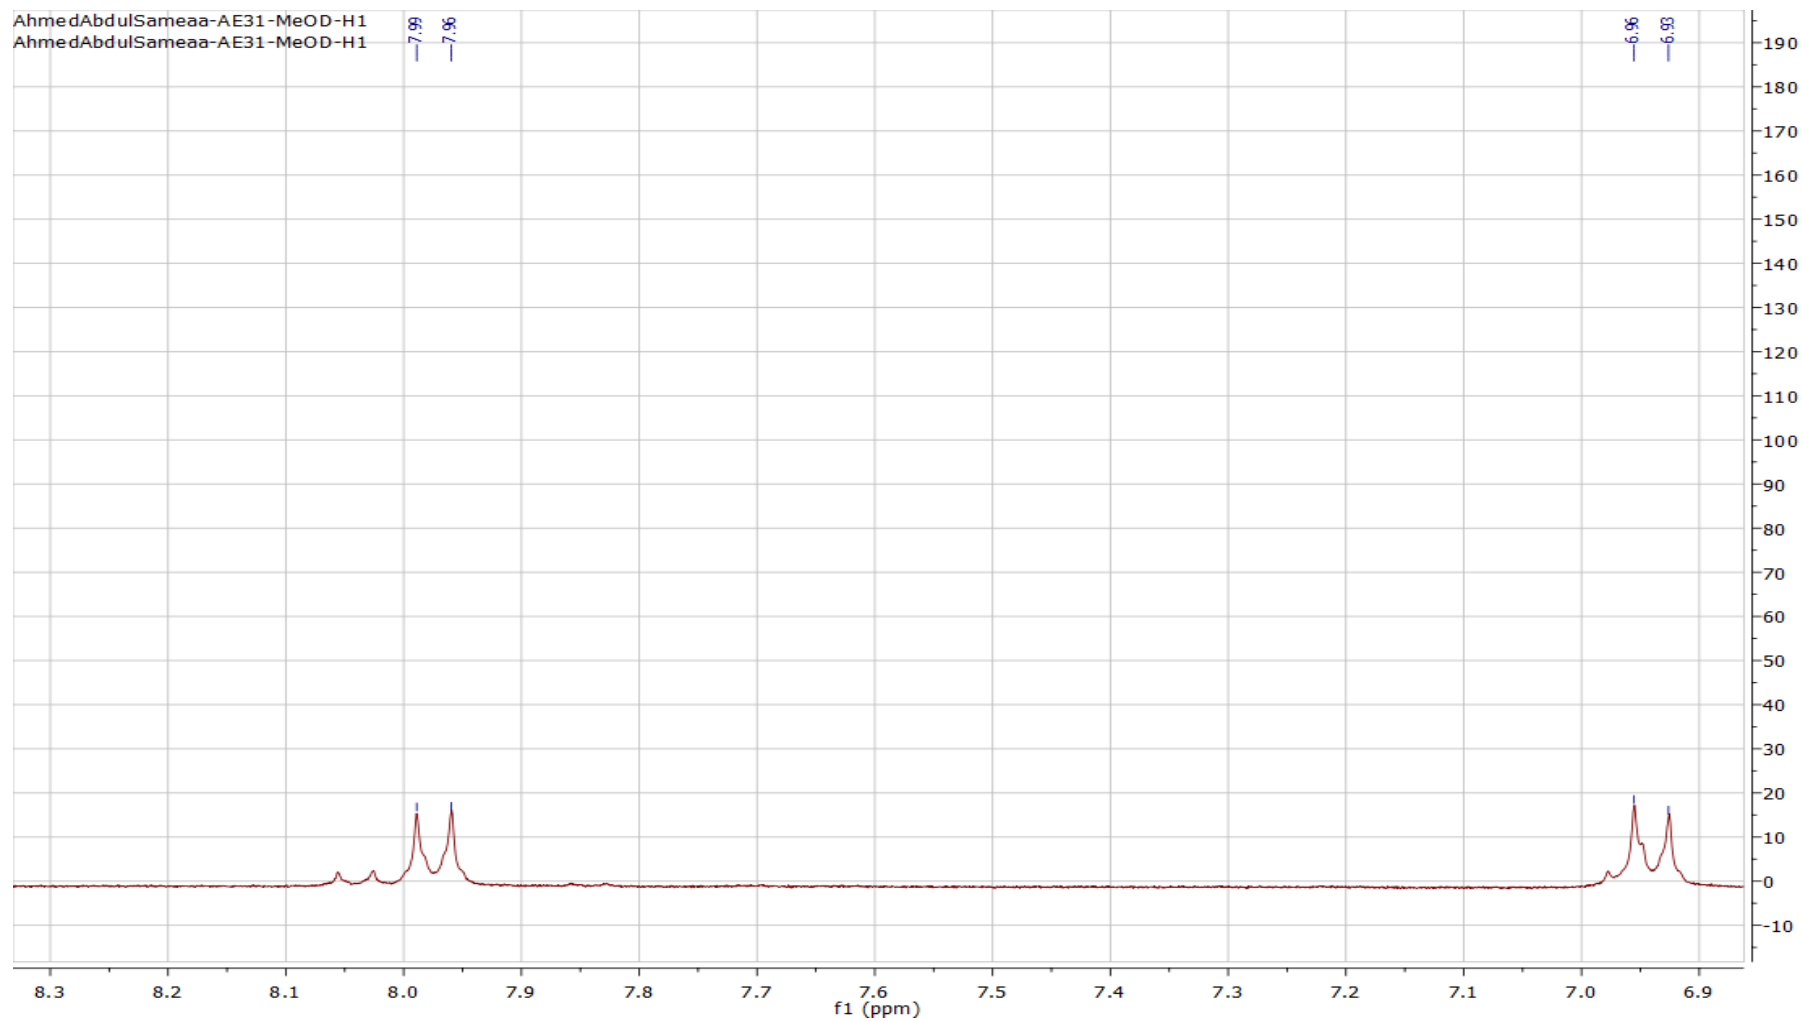

**Figure 38: Partial expansion of  $^1\text{H}$ -NMR spectrum of compound 6 (300 MHz,  $\text{CD}_3\text{OD}$ )**

Pos\_AB-AE.mzML#1847 @5.07 MS1 p+, base peak: 433.3286 m/z (3.5E5)

Scan definition: scanId=304269

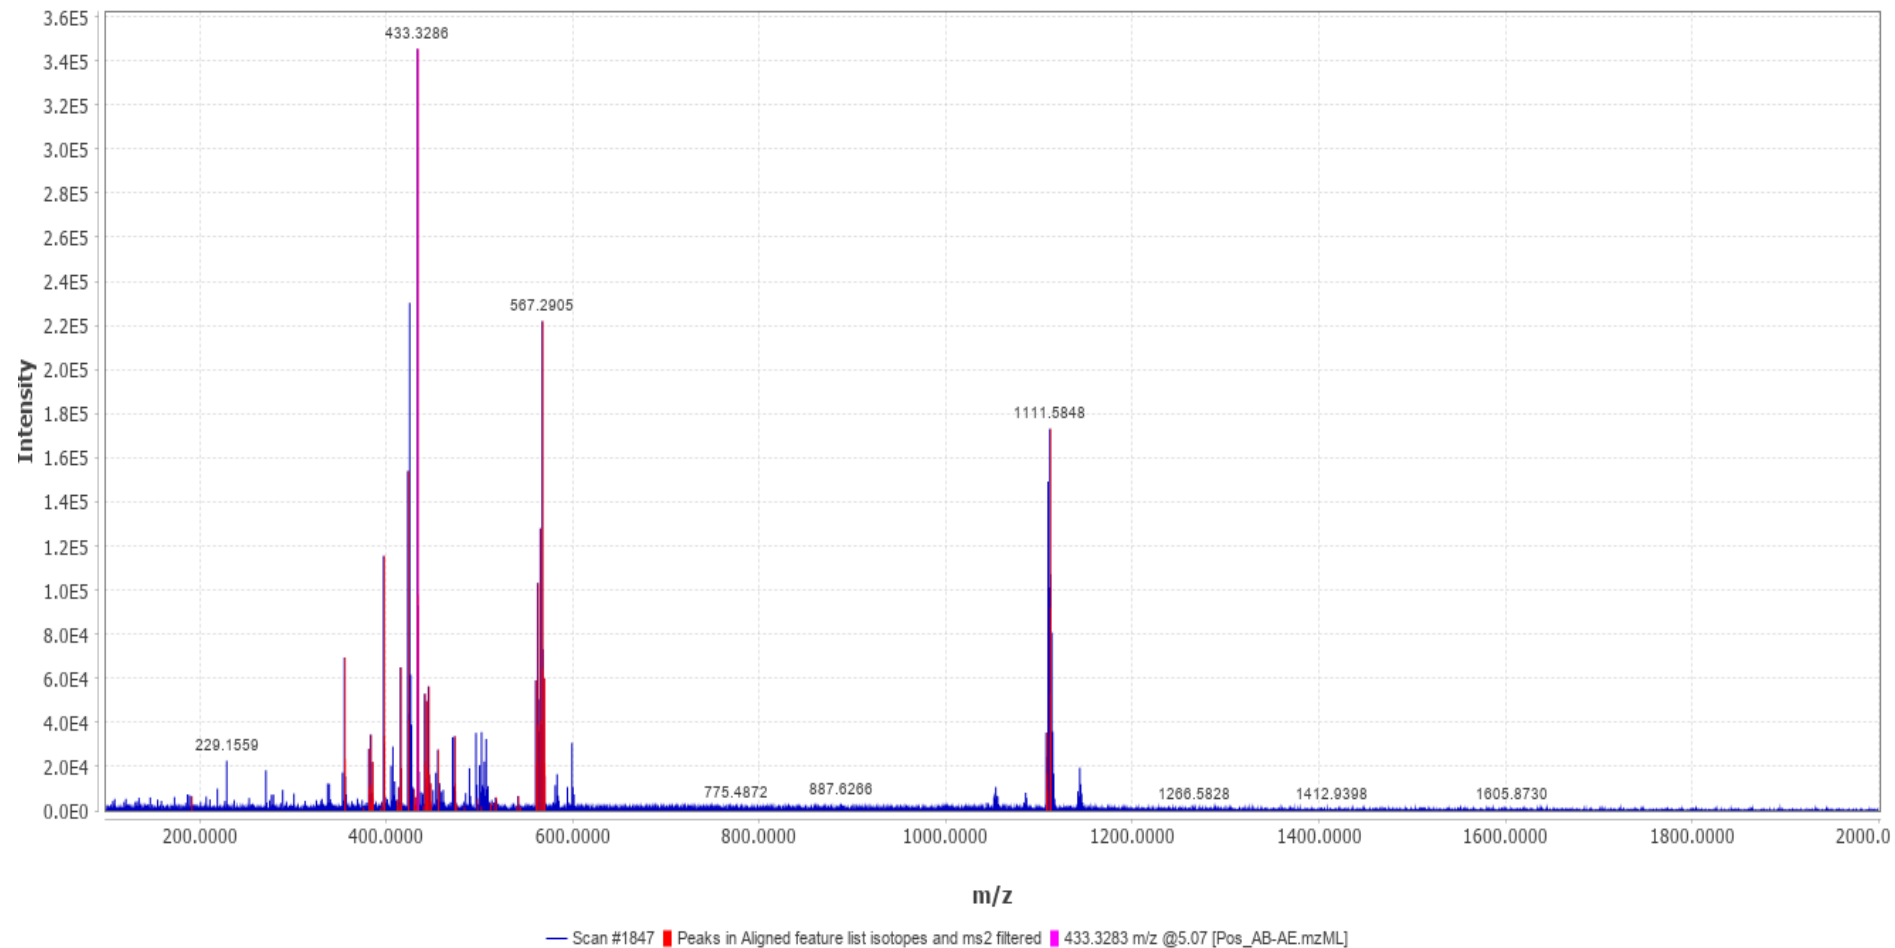

**Figure 39: LC-MS/MS of compound 7**

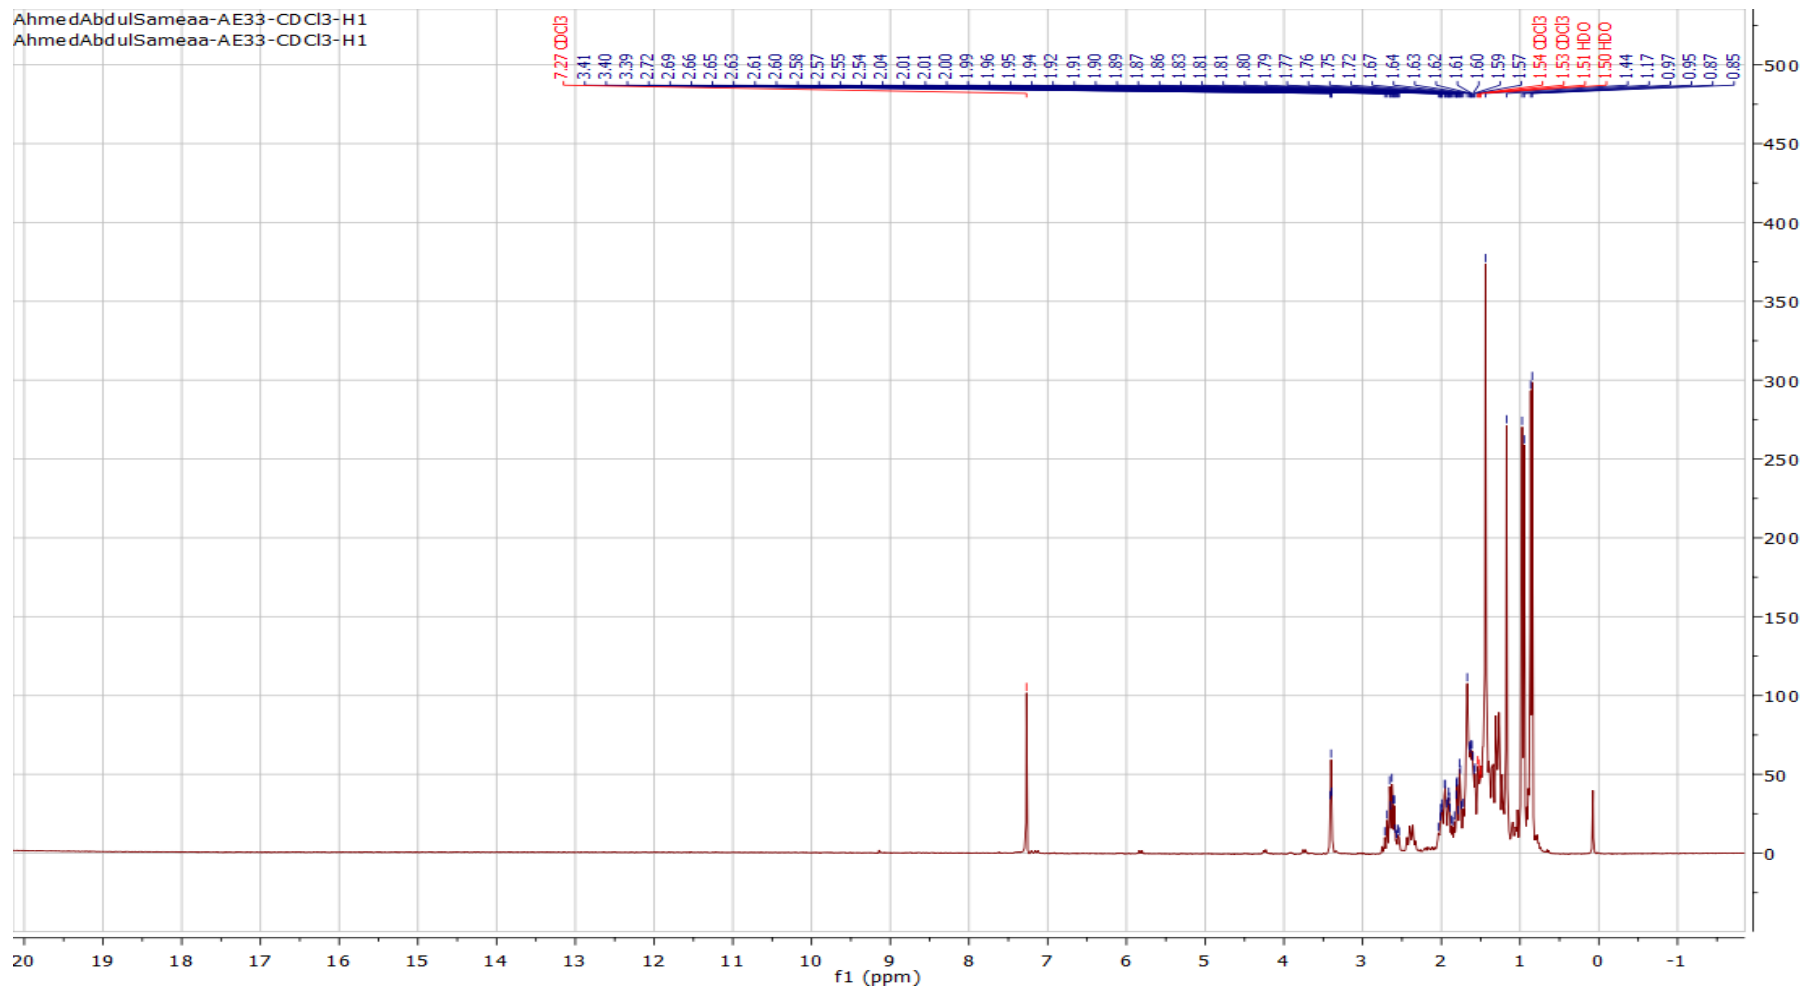

Figure 40:  $^1\text{H}$ -NMR spectrum of compound 7 (300 MHz,  $\text{CDCl}_3$ )

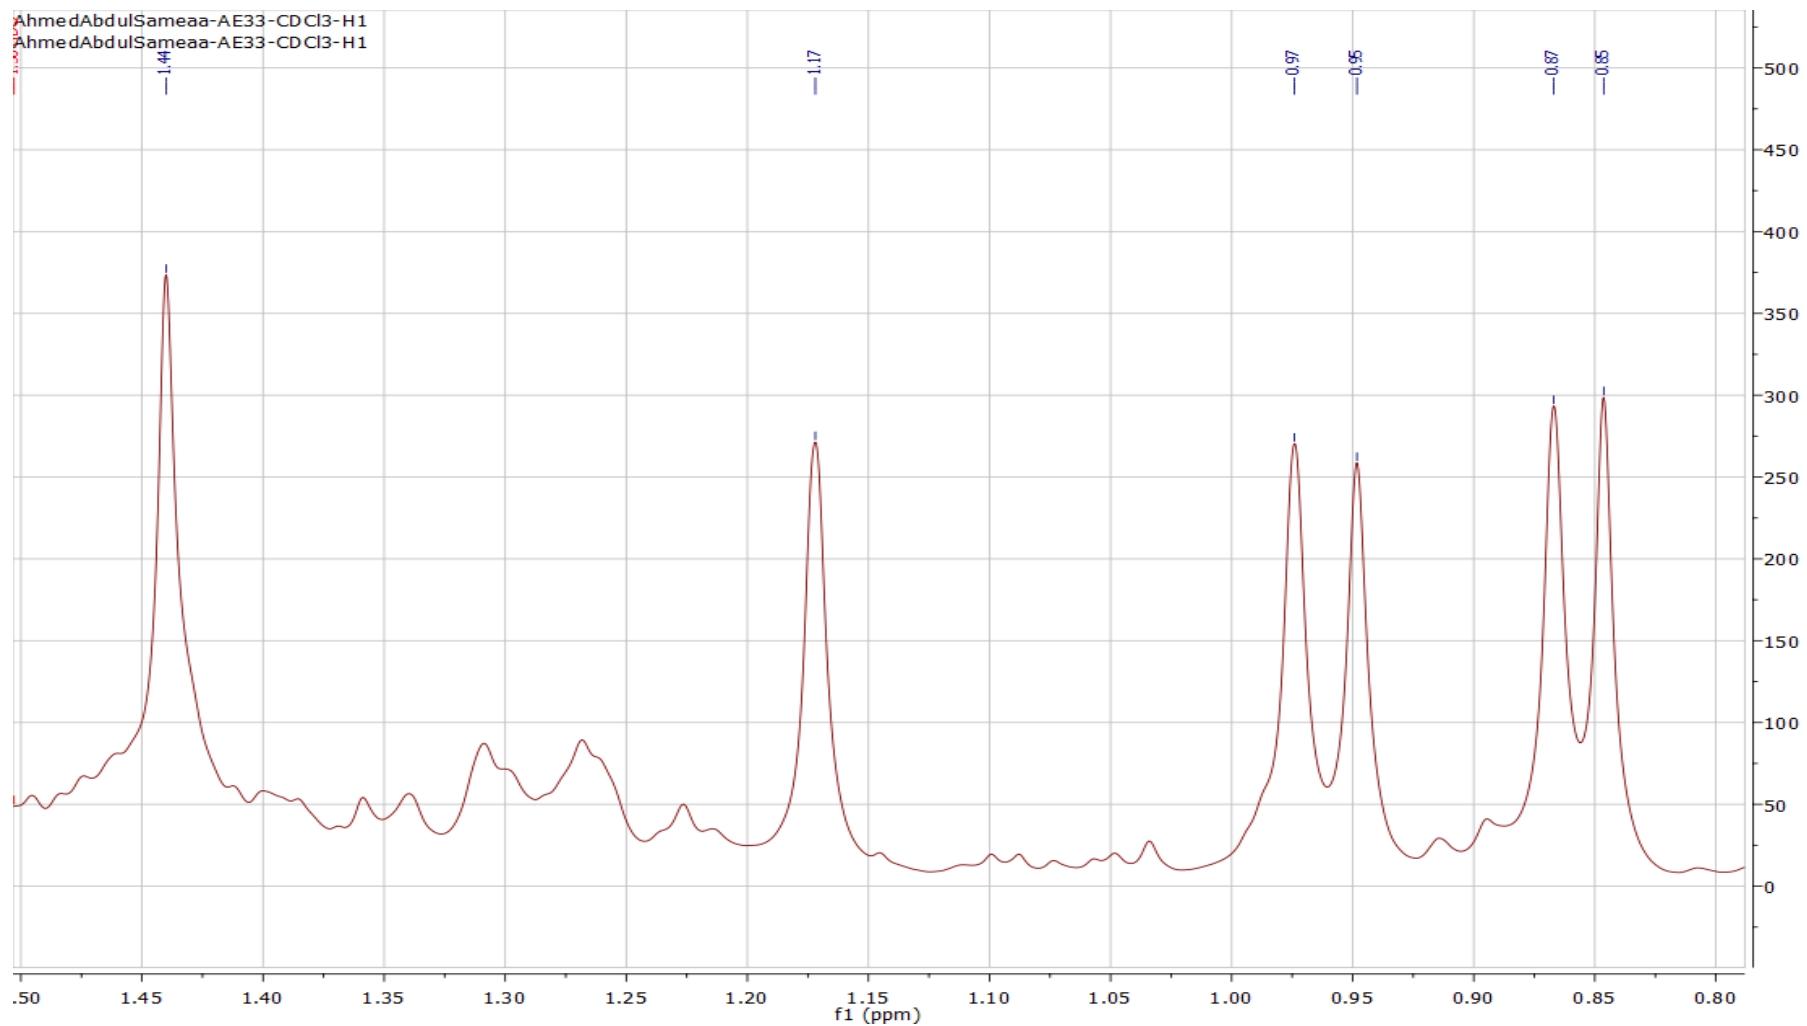

**Figure 41: Partial expansion of <sup>1</sup>H-NMR spectrum of compound 7 (300 MHz, CDCl<sub>3</sub>)**

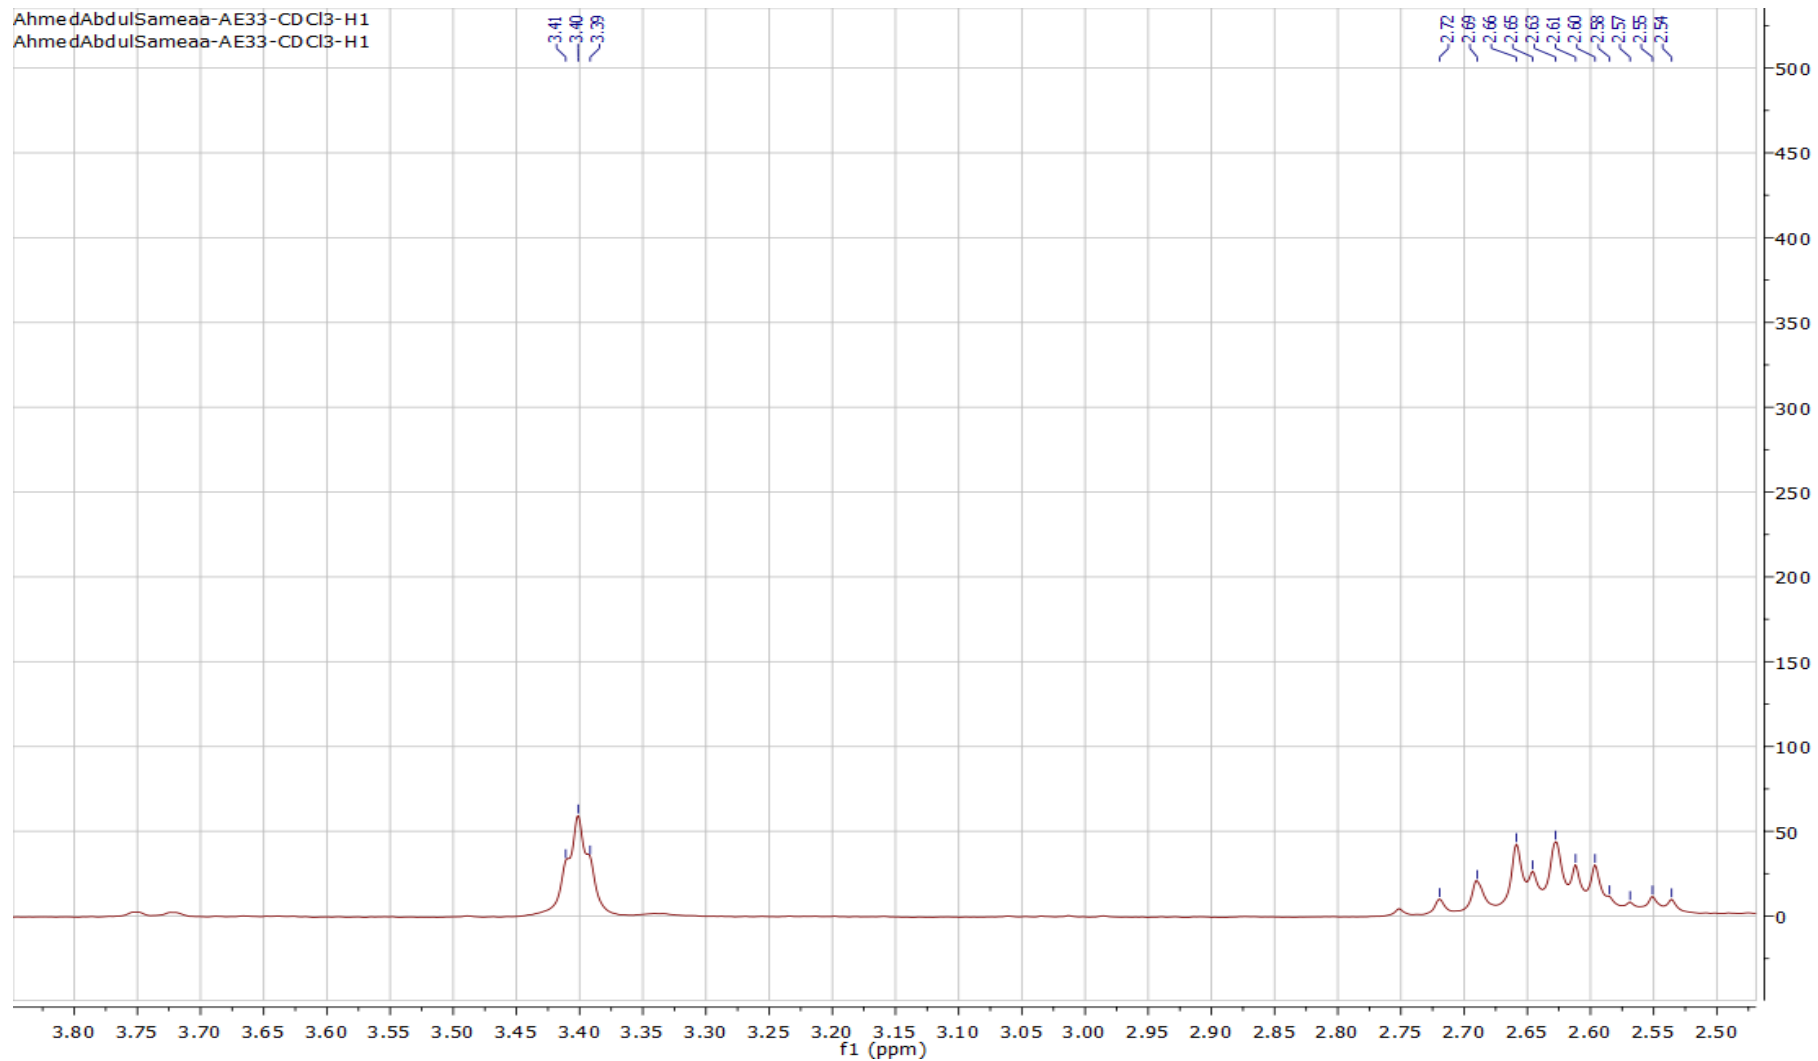

Figure 42: Partial expansion of  $^1\text{H}$ -NMR spectrum of compound 7 (300 MHz,  $\text{CDCl}_3$ )



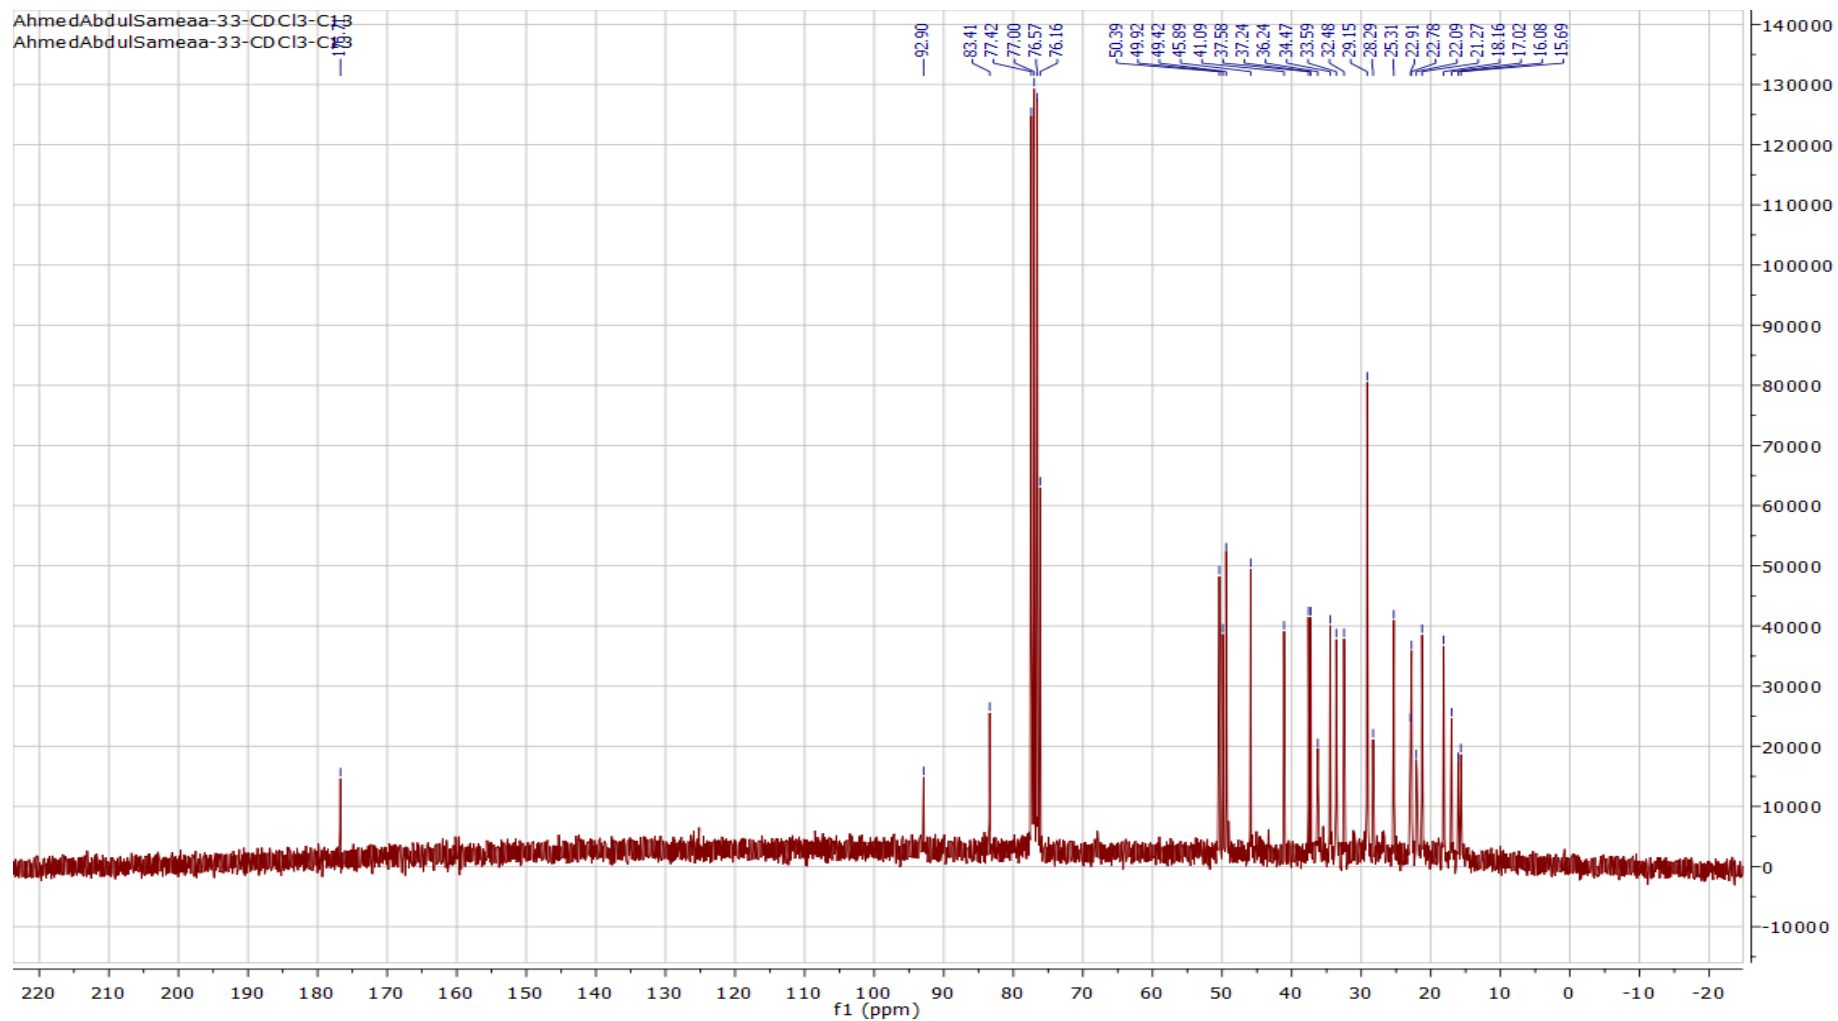

Figure 43:  $^{13}\text{C}$ -NMR spectrum of compound 7 (75 MHz,  $\text{CDCl}_3$ )

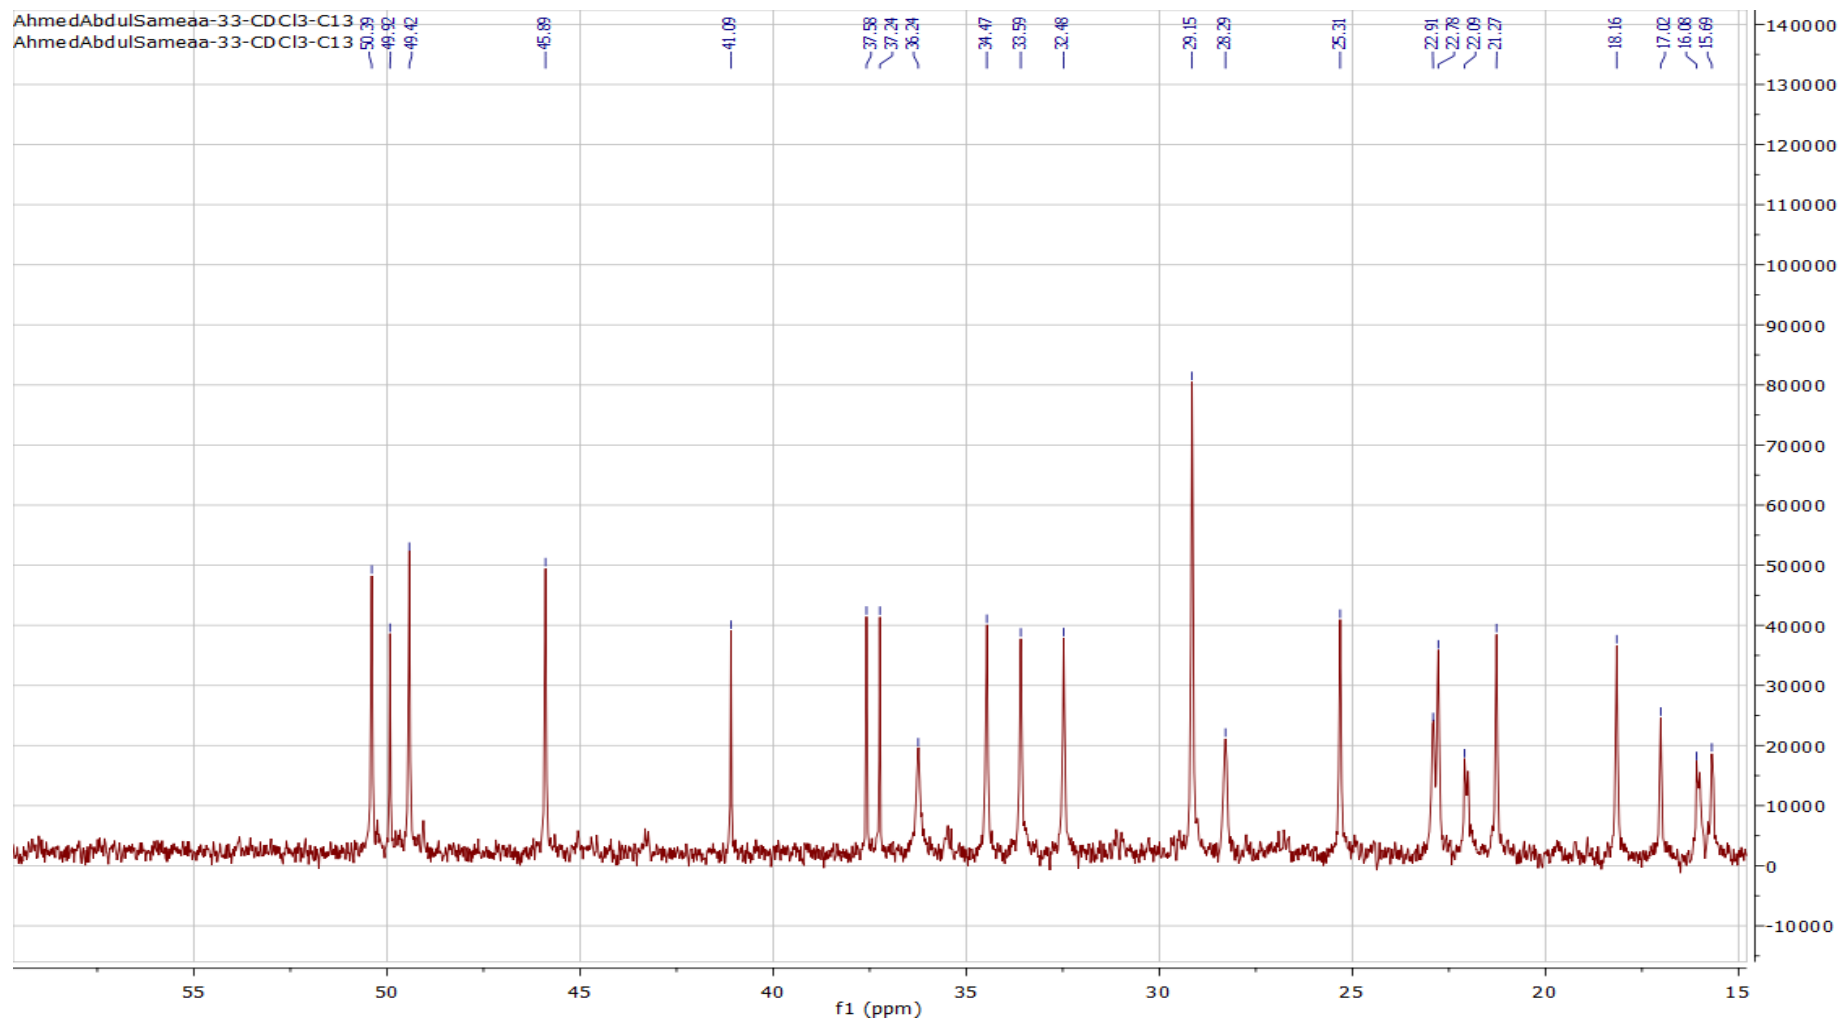

Figure 44: Partial expansion of <sup>13</sup>C-NMR spectrum of compound 7 (75 MHz, CDCl<sub>3</sub>)



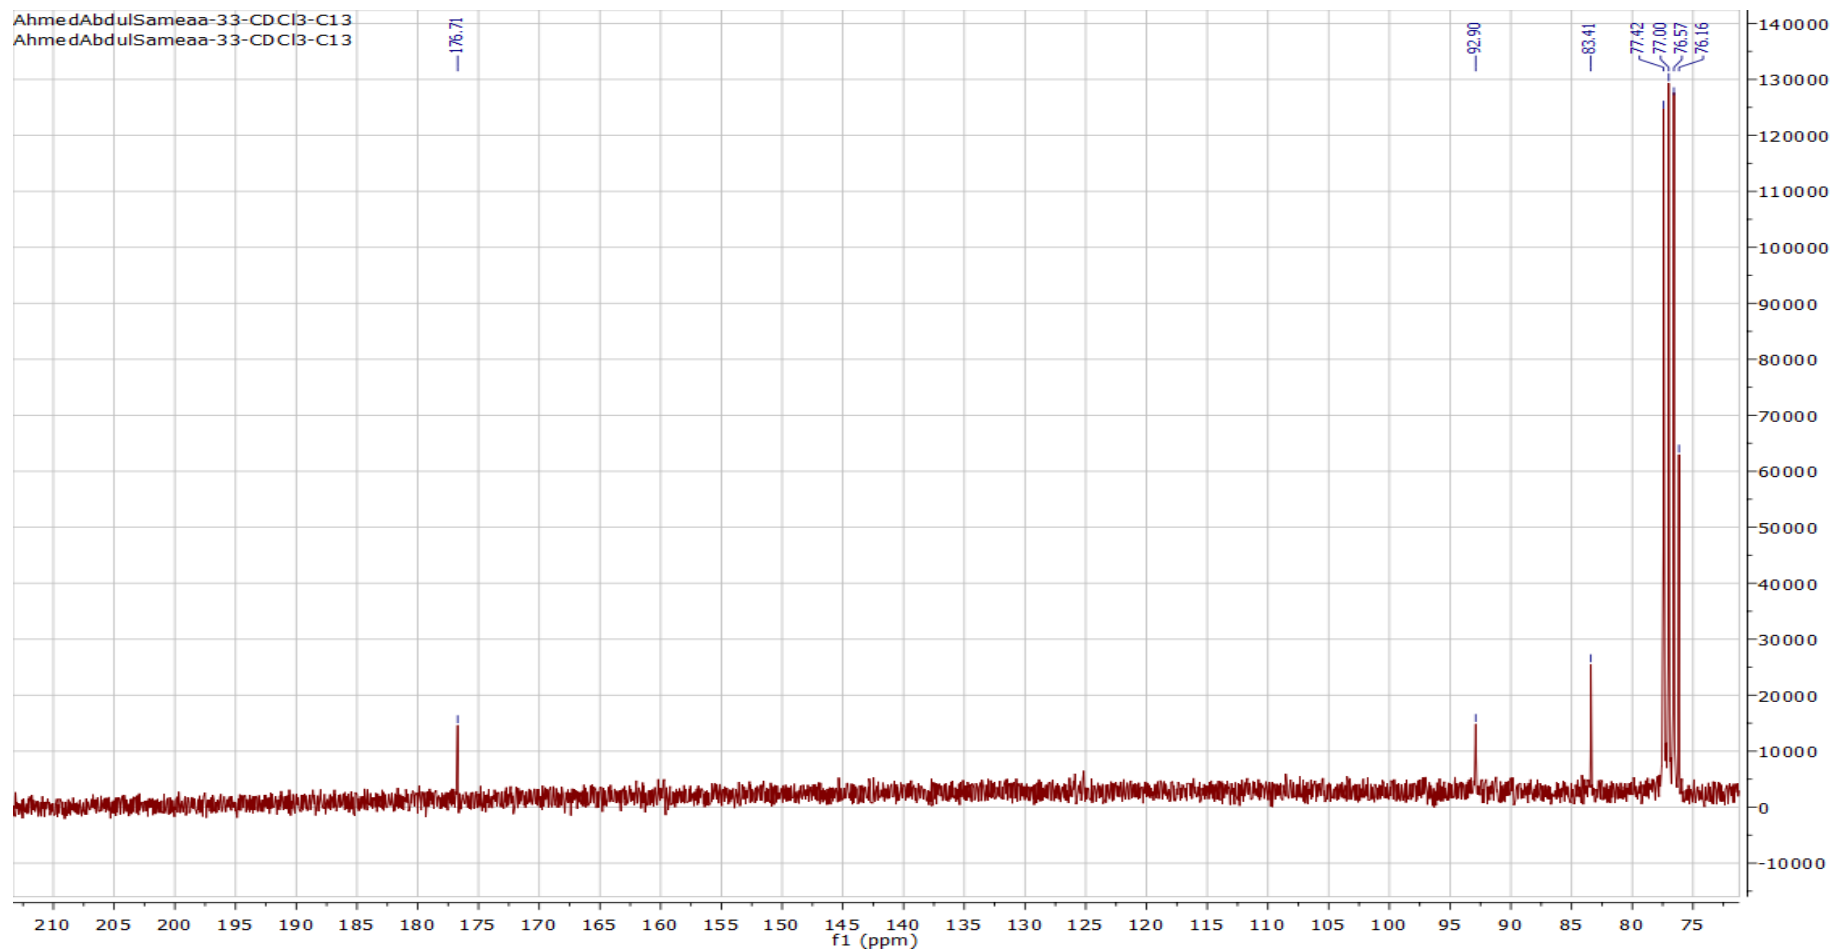

Figure 45: Partial expansion of  $^{13}\text{C}$ -NMR spectrum of compound 7 (75 MHz,  $\text{CDCl}_3$ )



Pos\_AB-AE.mzML#1977 @5.43 MS1 p+, base peak: 457.3633 m/z (1.0E6)

Scan definition: scanId=325880

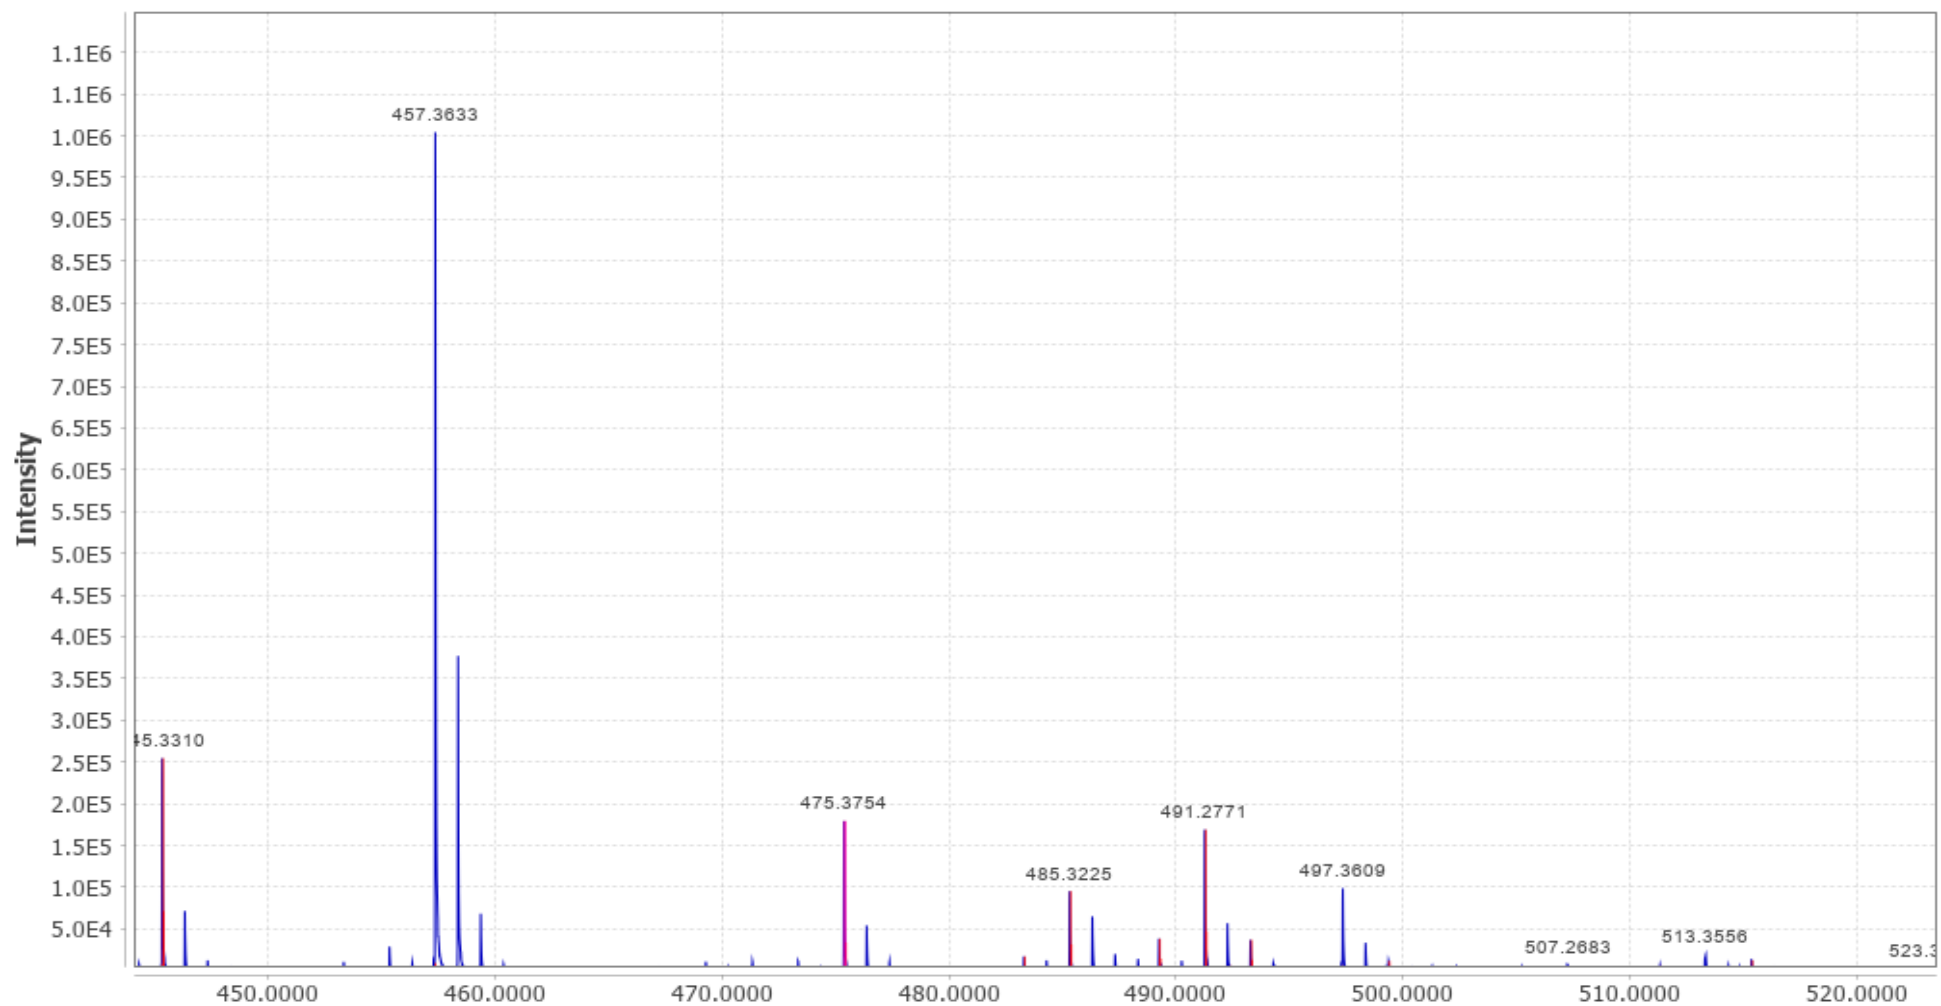

Figure 46: LC-MS/MS of compound 8

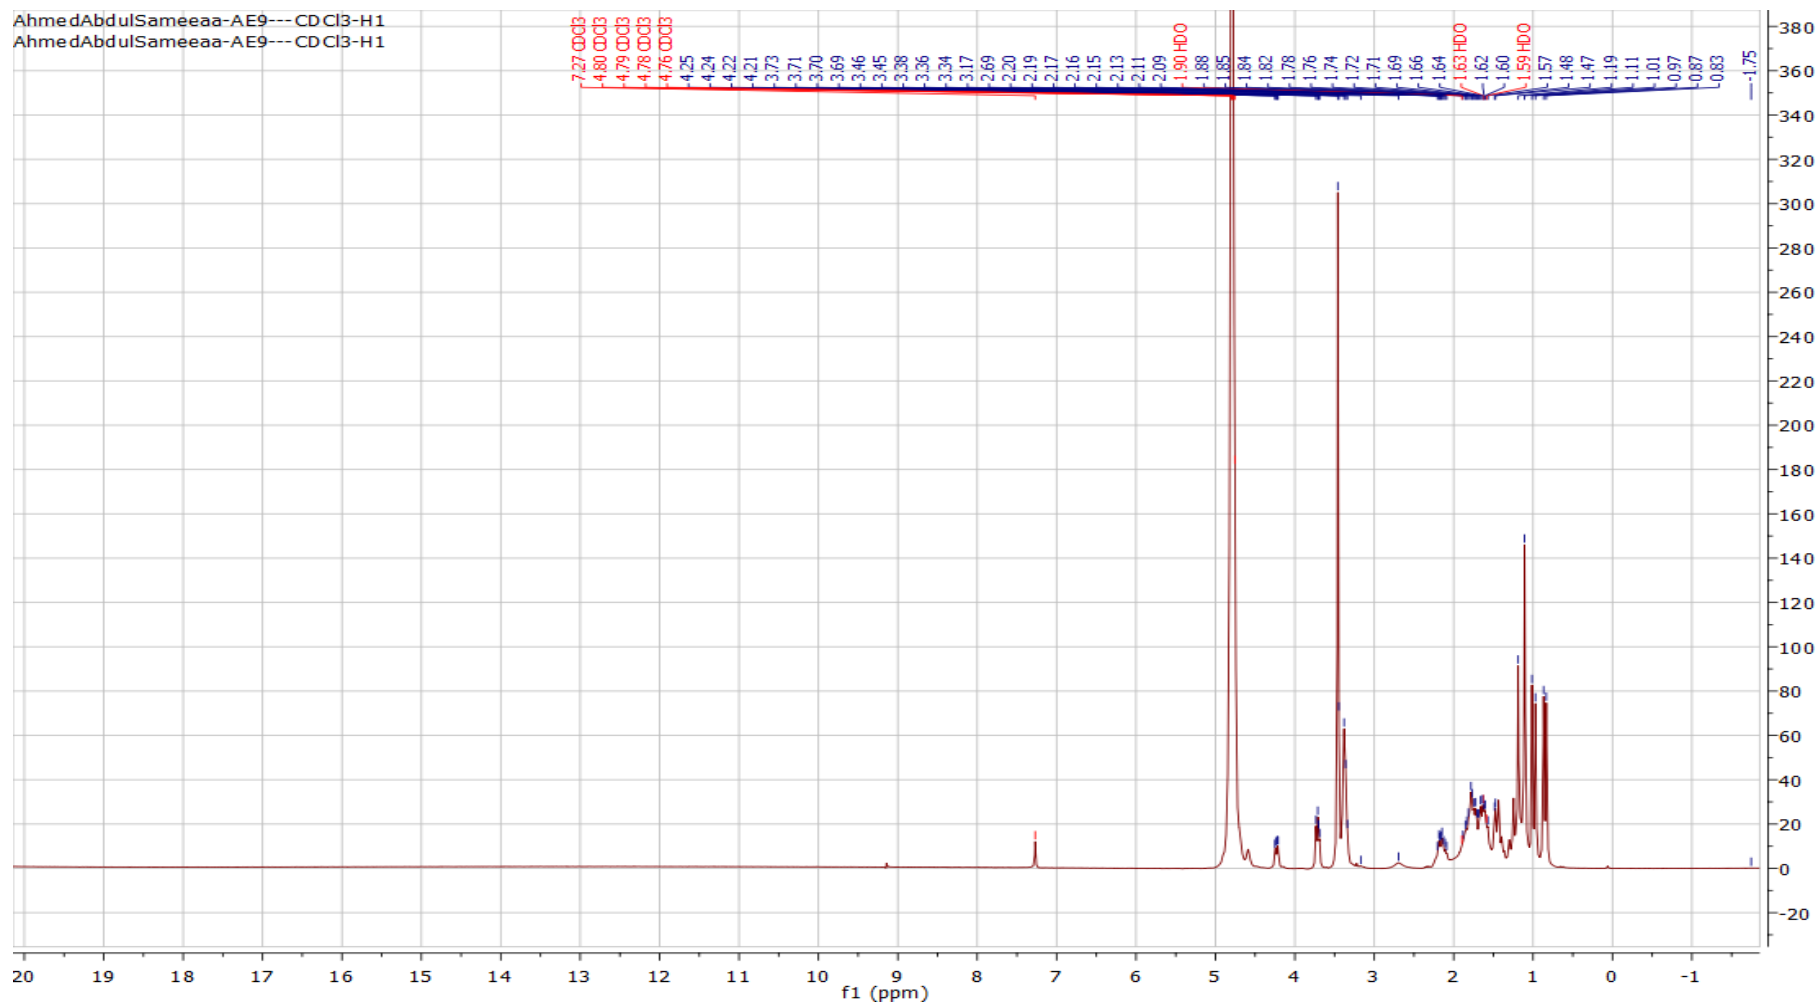

Figure 47:  $^1\text{H-NMR}$  spectrum of compound 8 (300 MHz,  $\text{CDCl}_3$ )

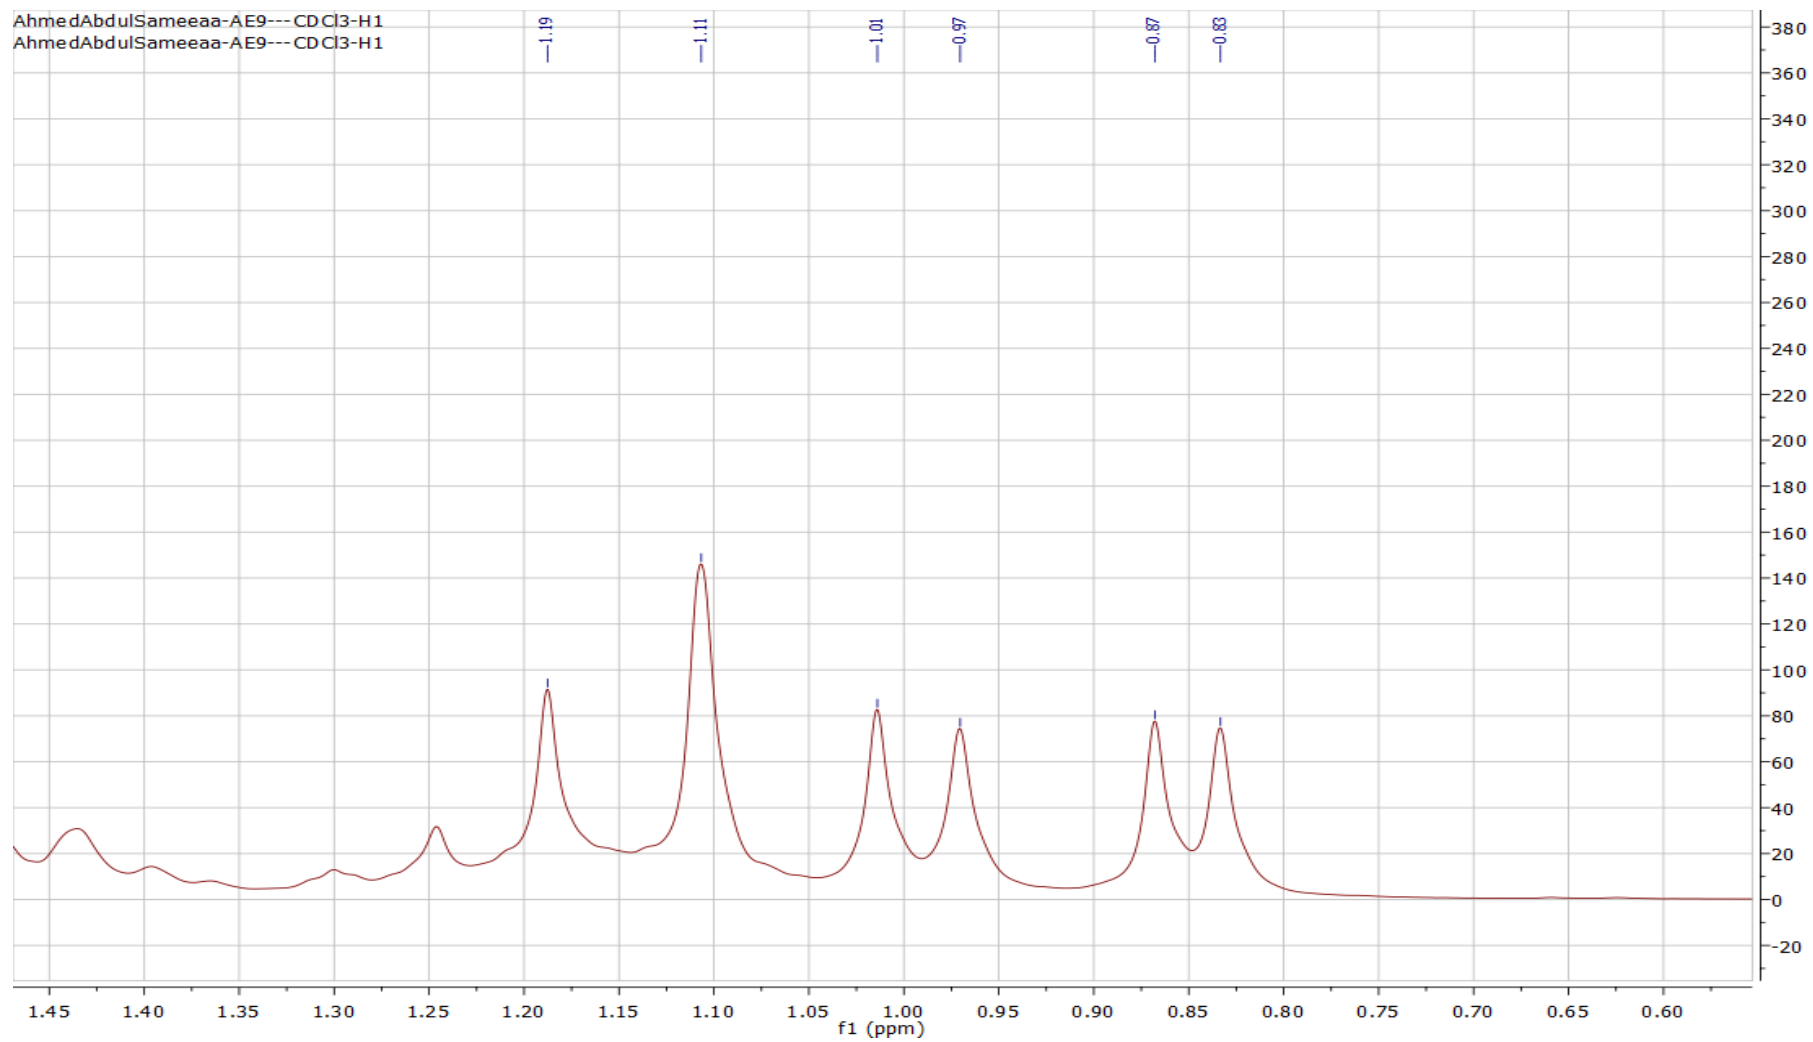

**Figure 48: Partial expansion of  $^1\text{H-NMR}$  spectrum of compound 8 (300 MHz,  $\text{CDCl}_3$ )**



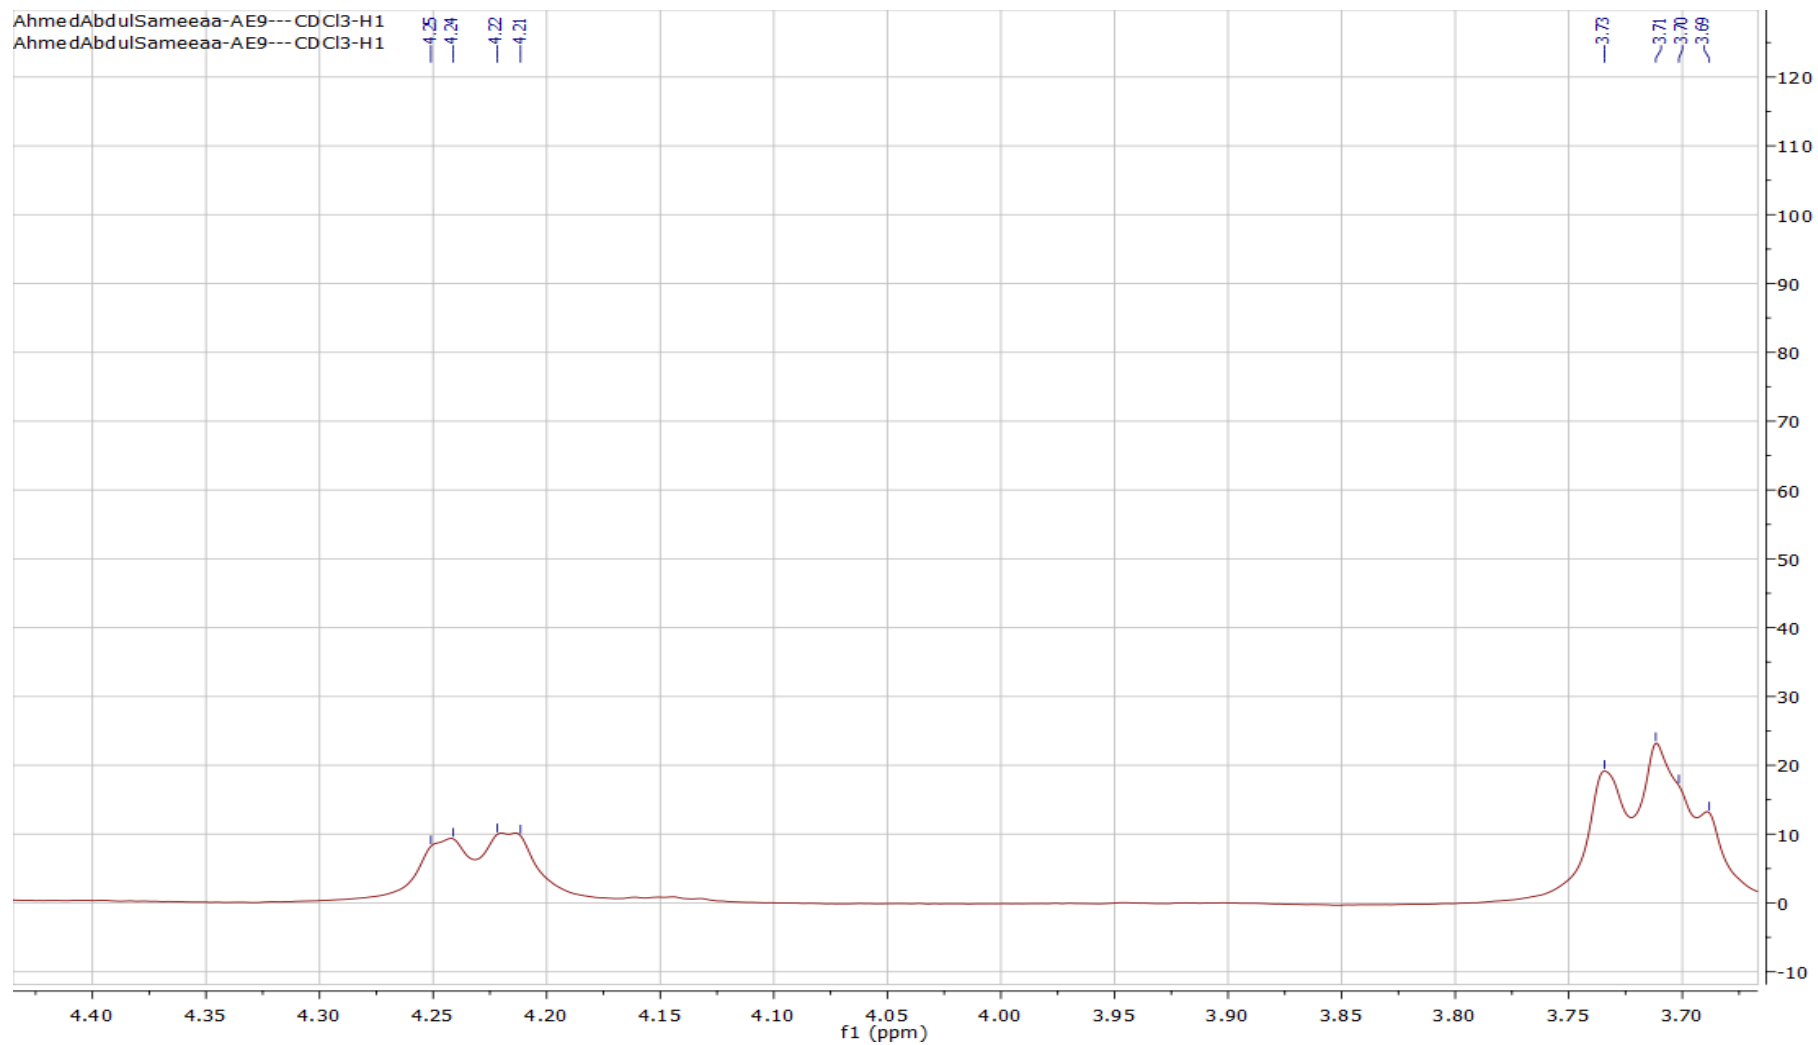

**Figure 49: Partial expansion of  $^1\text{H}$ -NMR spectrum of compound 8 (300 MHz,  $\text{CDCl}_3$ )**

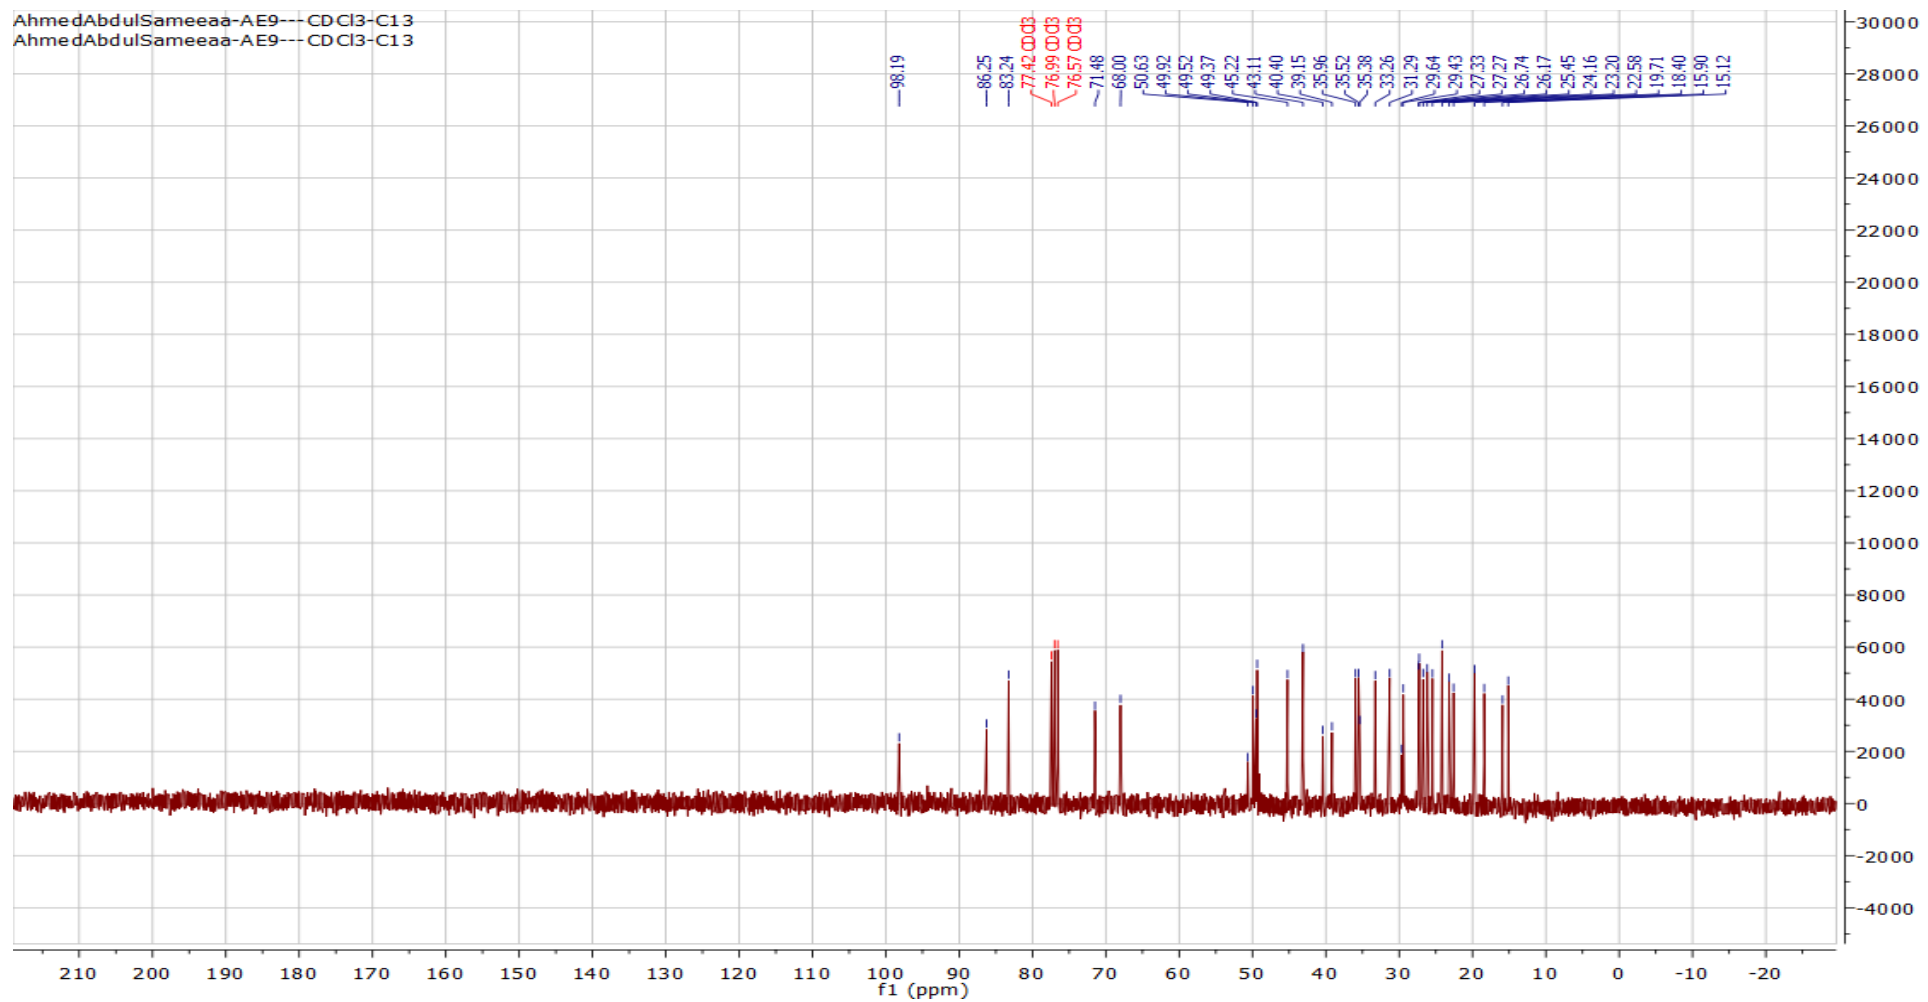

Figure 50:  $^{13}\text{C}$ -NMR spectrum of compound 8 (75 MHz,  $\text{CDCl}_3$ )

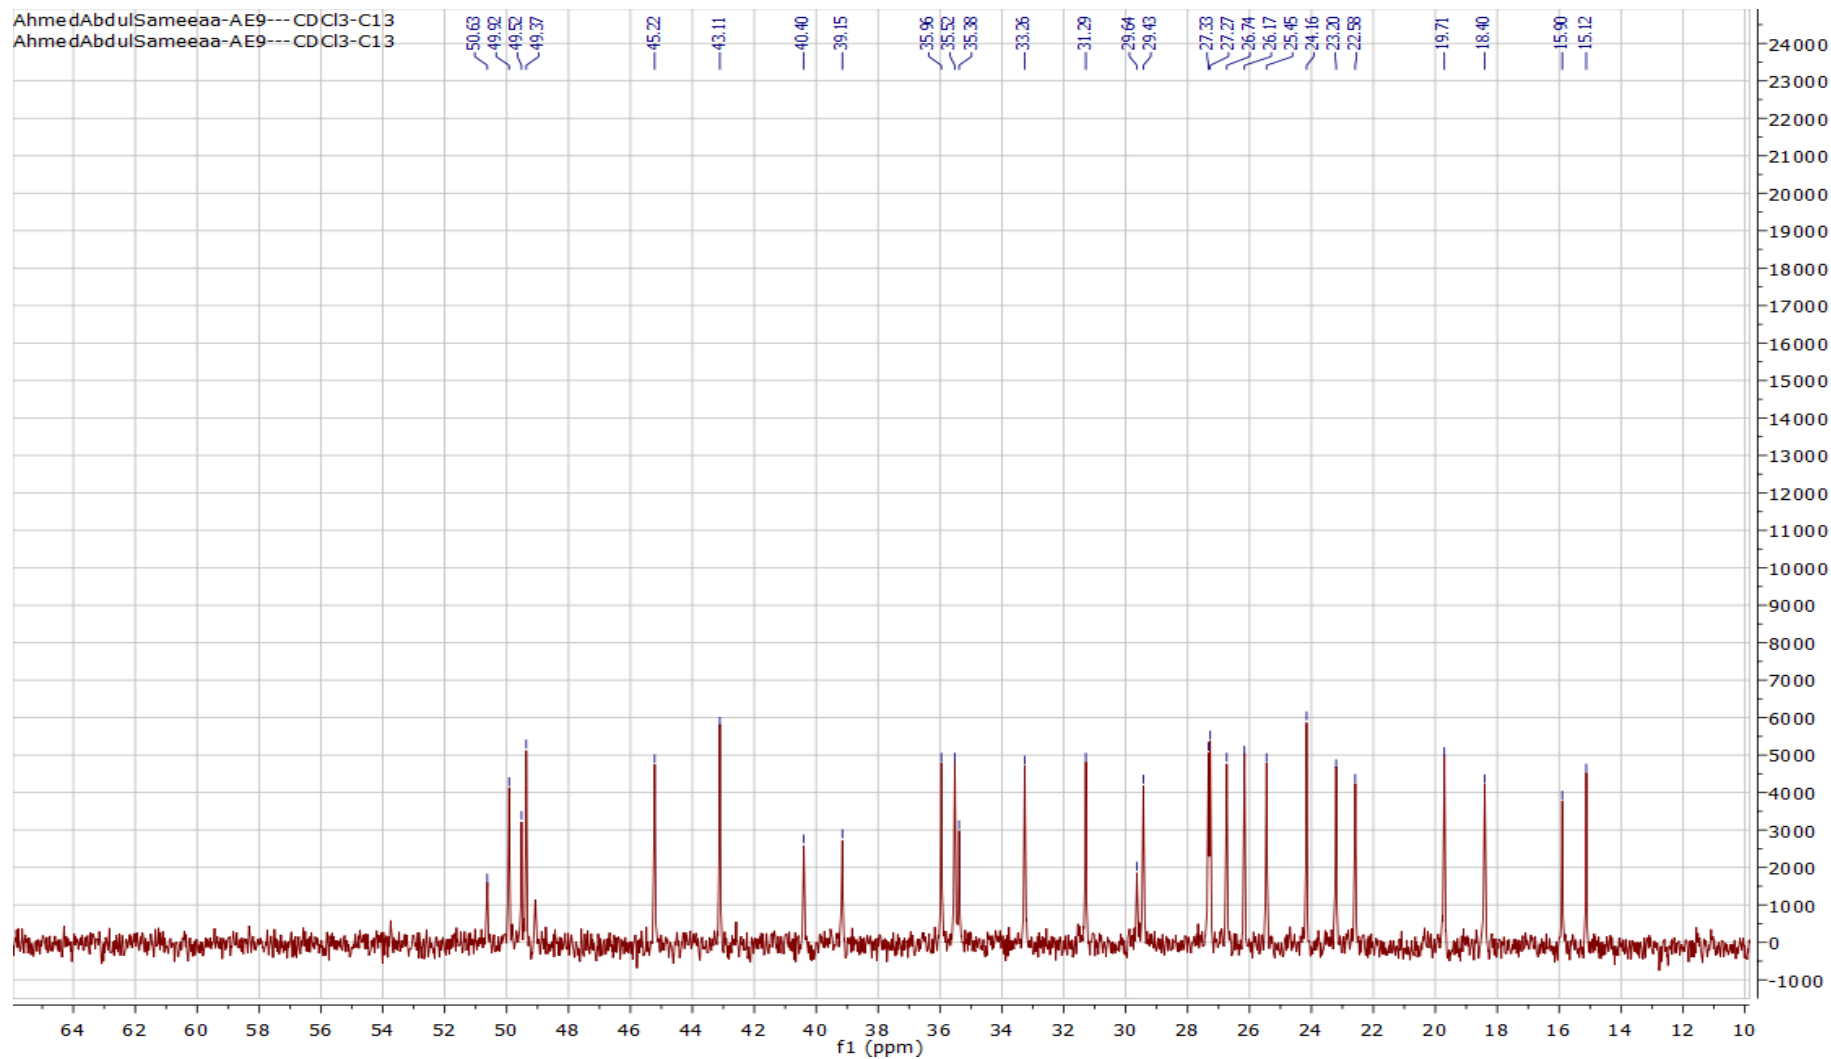

Figure 51: Partial expansion of  $^{13}\text{C}$ -NMR spectrum of compound 8 (75 MHz,  $\text{CDCl}_3$ )

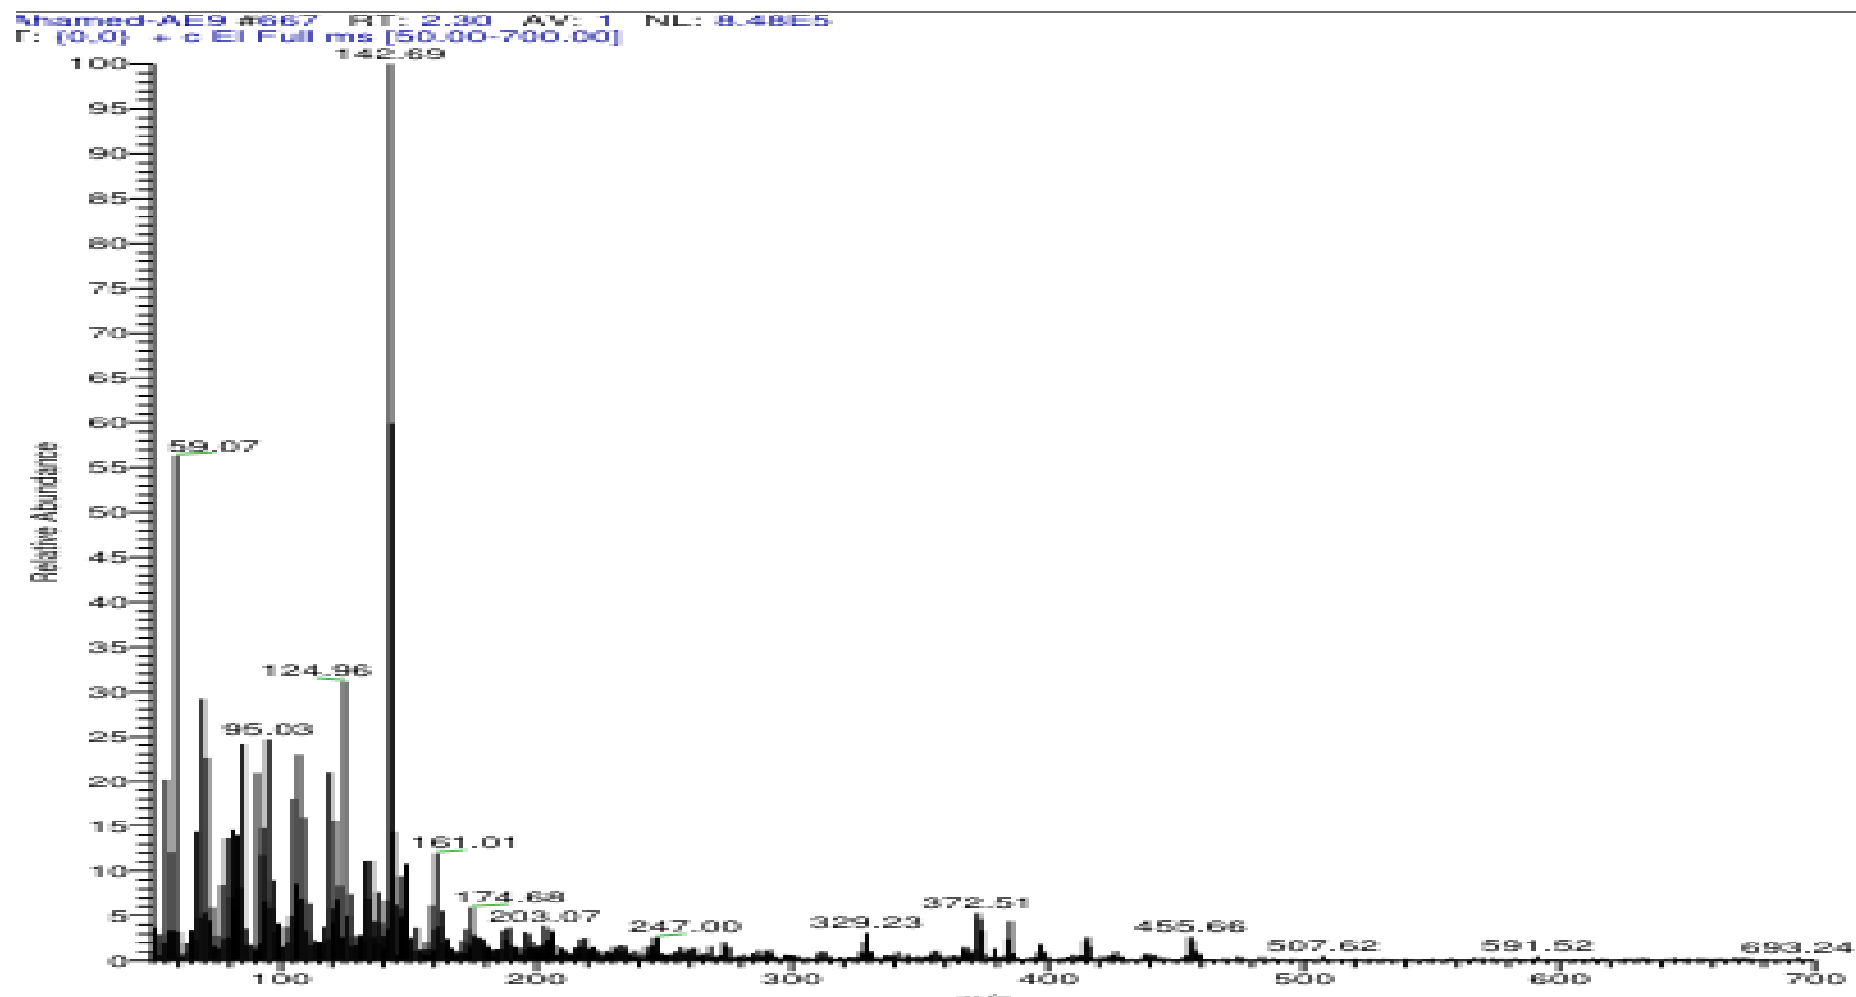

Figure 52: EI-MS of Compound 9

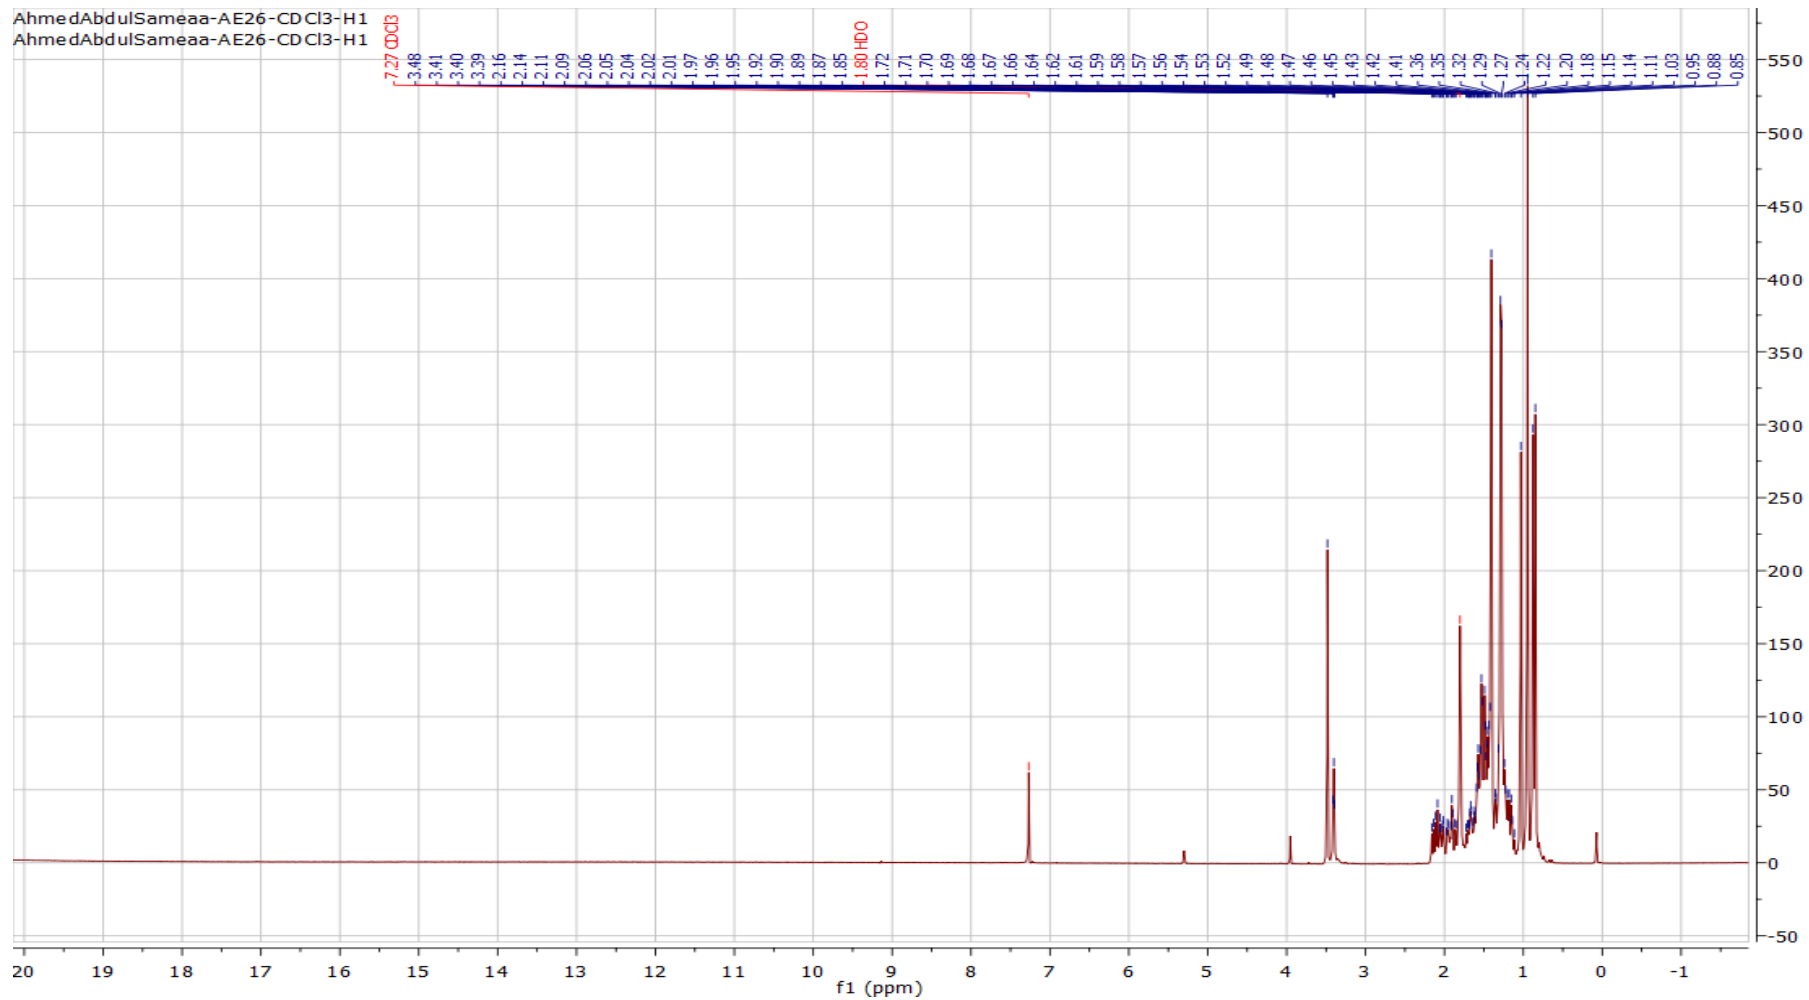

Figure 53:  $^1\text{H}$ -NMR spectrum of compound 9 (300 MHz,  $\text{CDCl}_3$ )



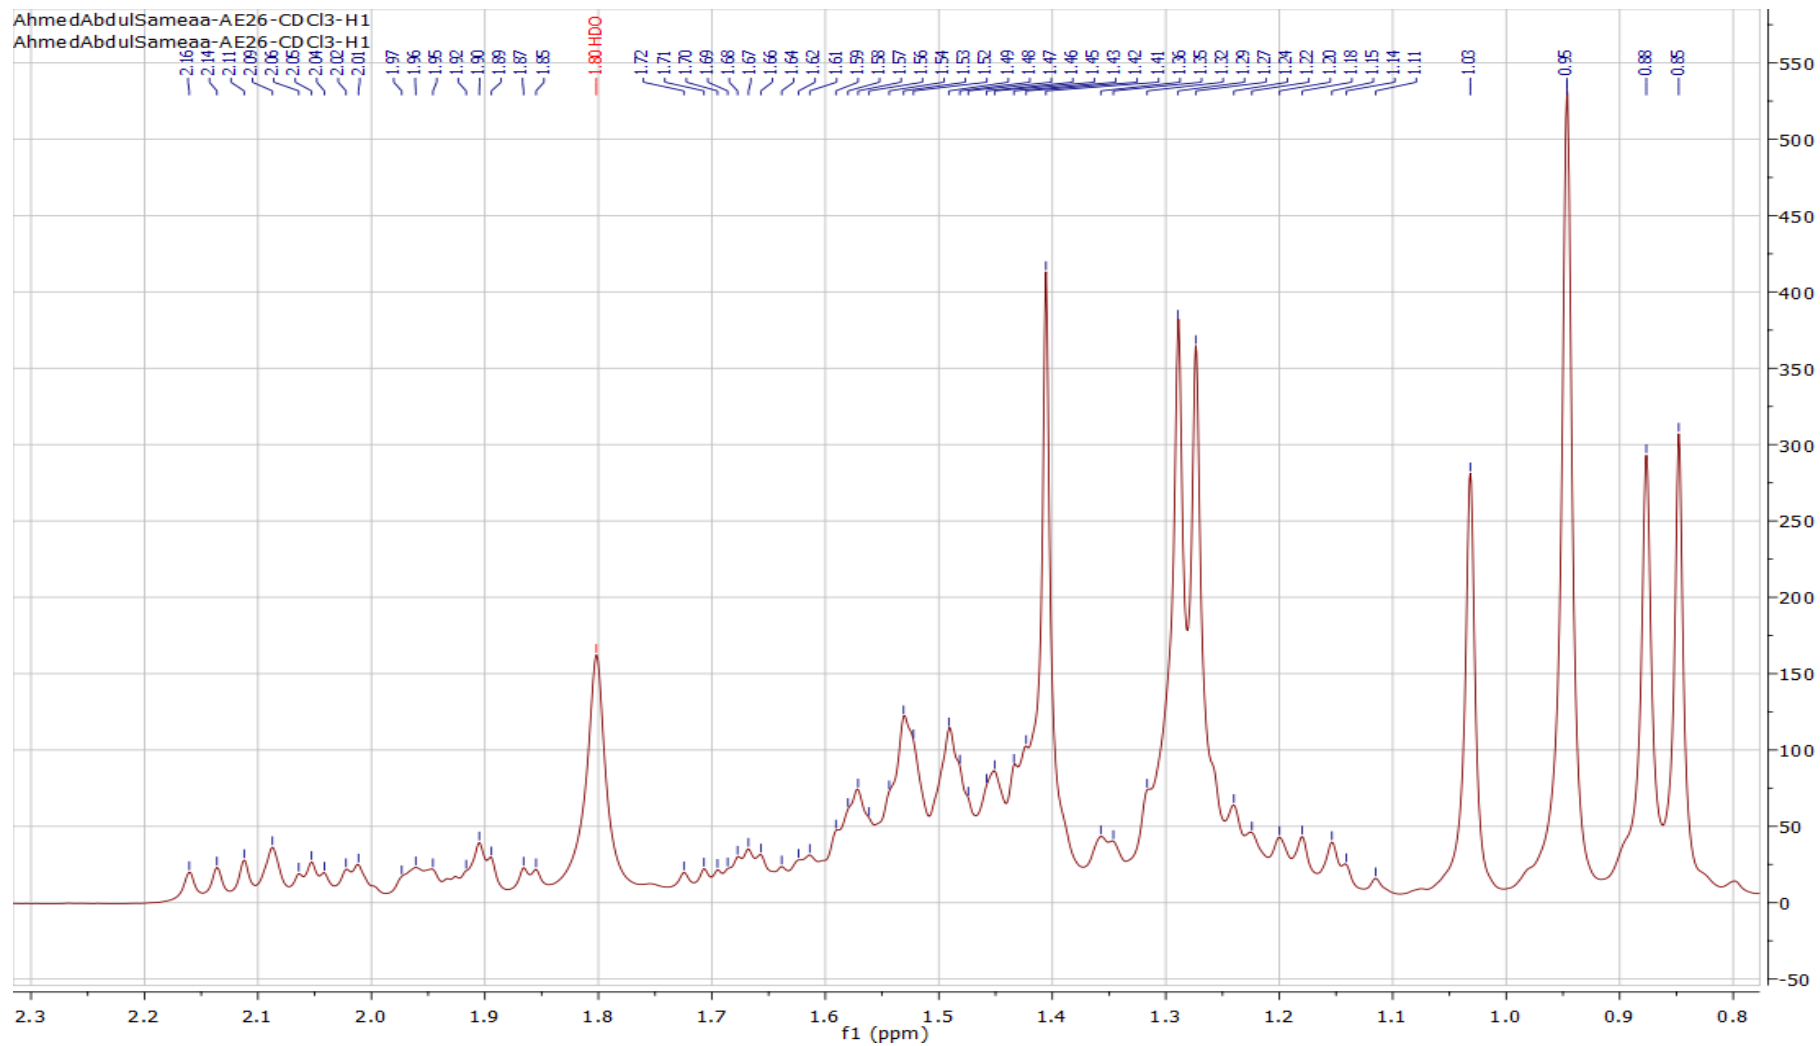

**Figure 54: Partial expansion of <sup>1</sup>H-NMR spectrum of compound 9 (300 MHz, CDCl<sub>3</sub>)**

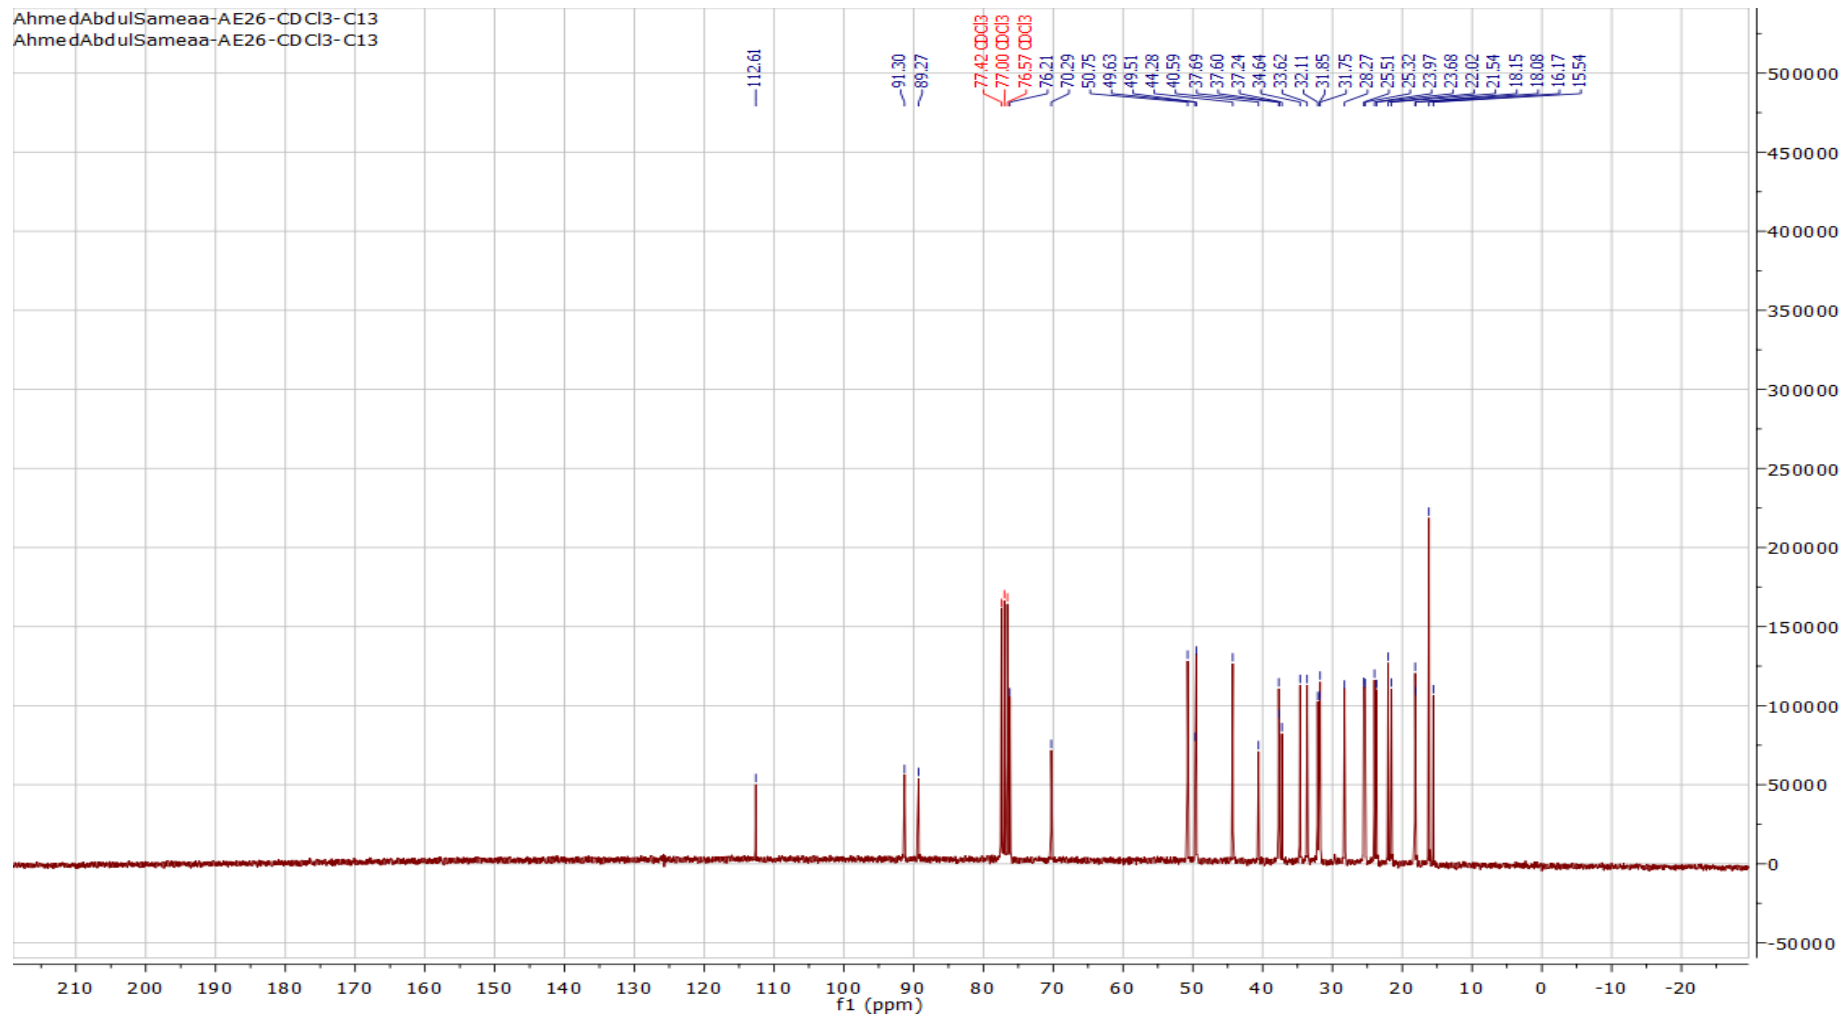

Figure 55:  $^{13}\text{C}$ -NMR spectrum of compound 9 (75 MHz,  $\text{CDCl}_3$ )



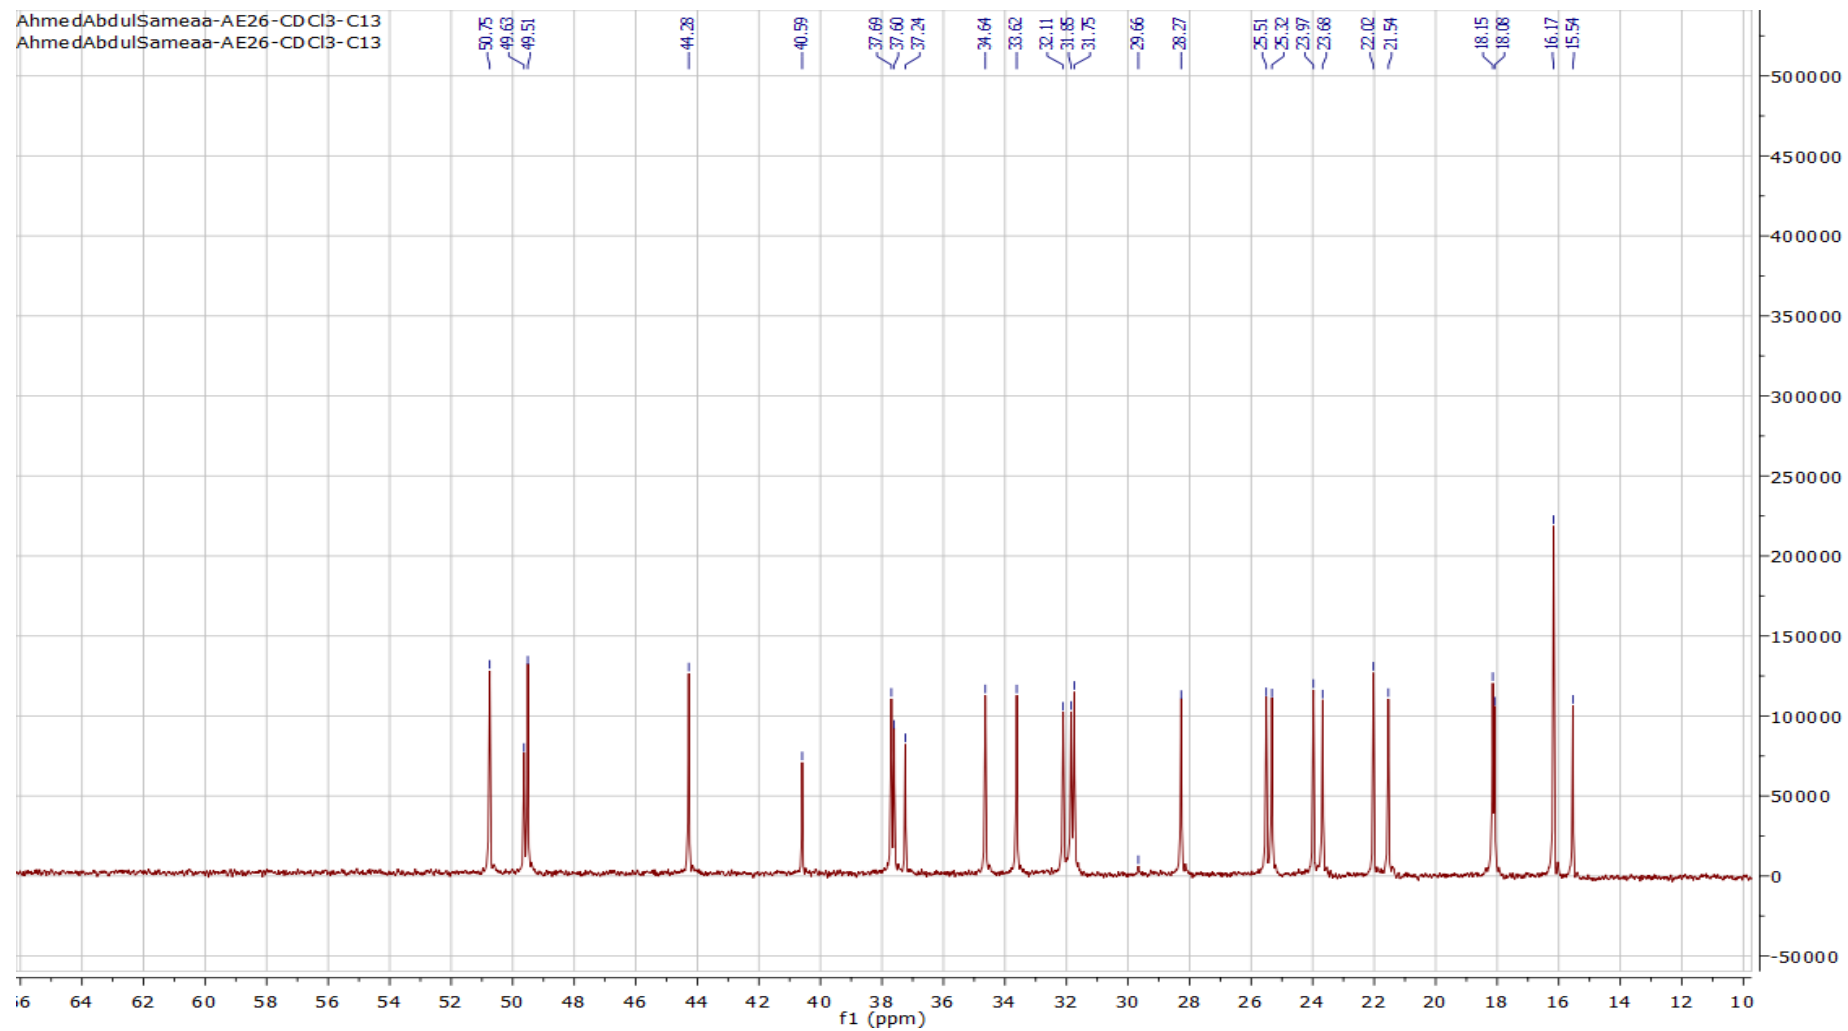

Figure 56: Partial expansion of  $^{13}\text{C}$ -NMR spectrum of compound 9 (75 MHz,  $\text{CDCl}_3$ )

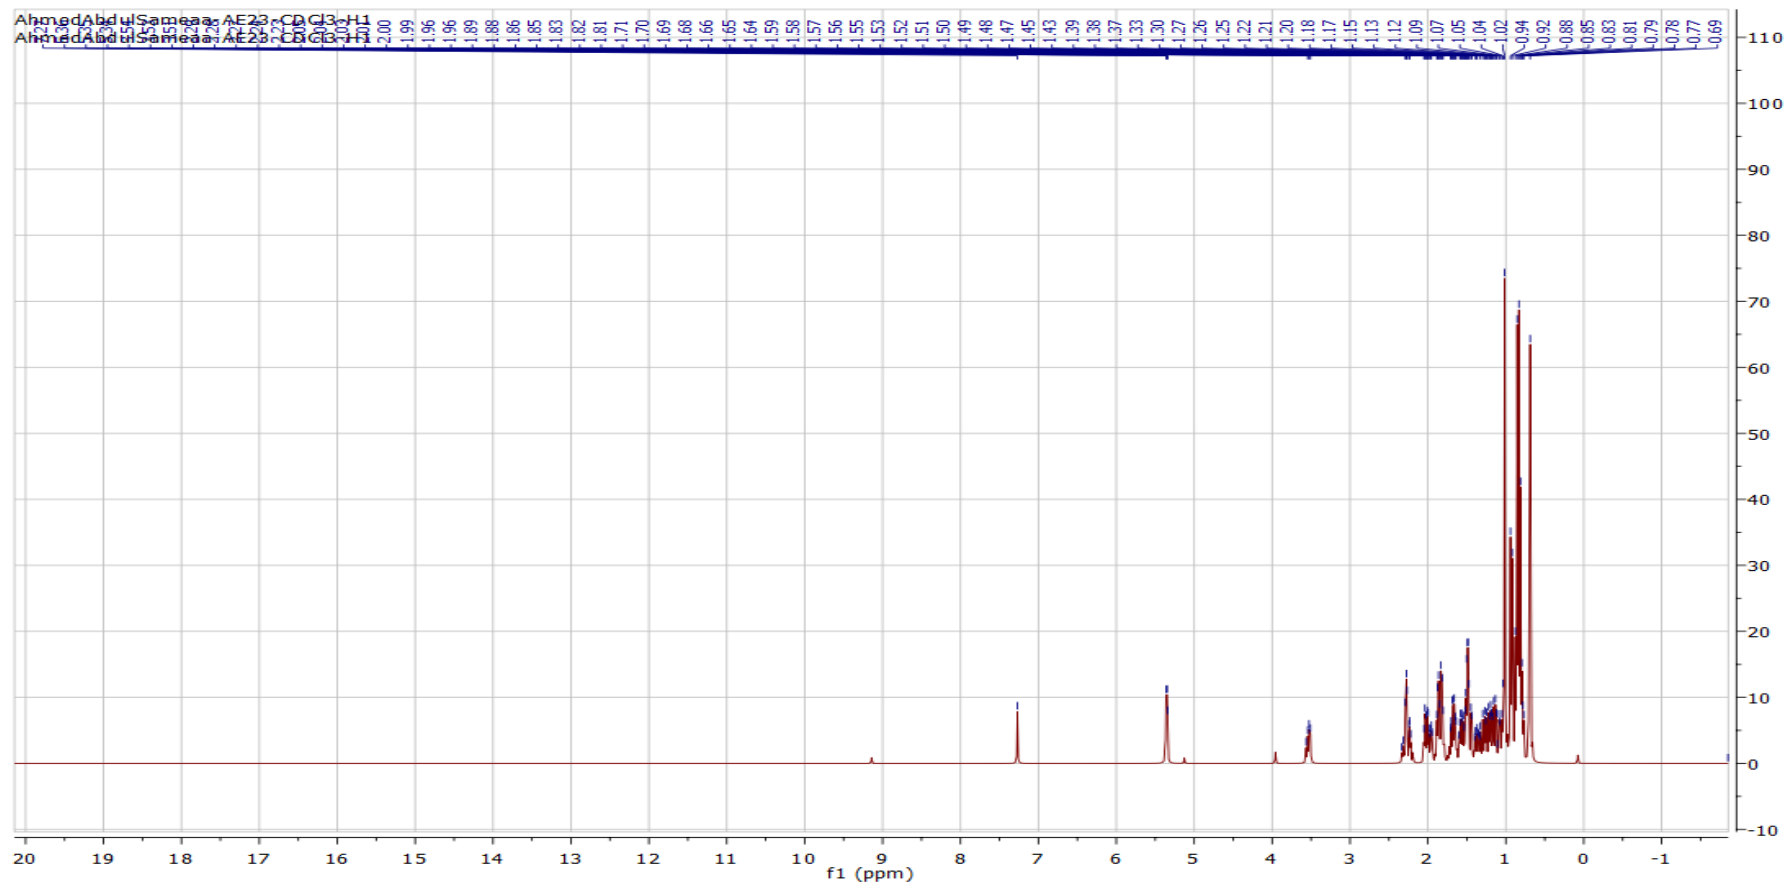

**Figure 57:  $^1\text{H}$ -NMR spectrum of compound 10 (300 MHz,  $\text{CDCl}_3$ )**

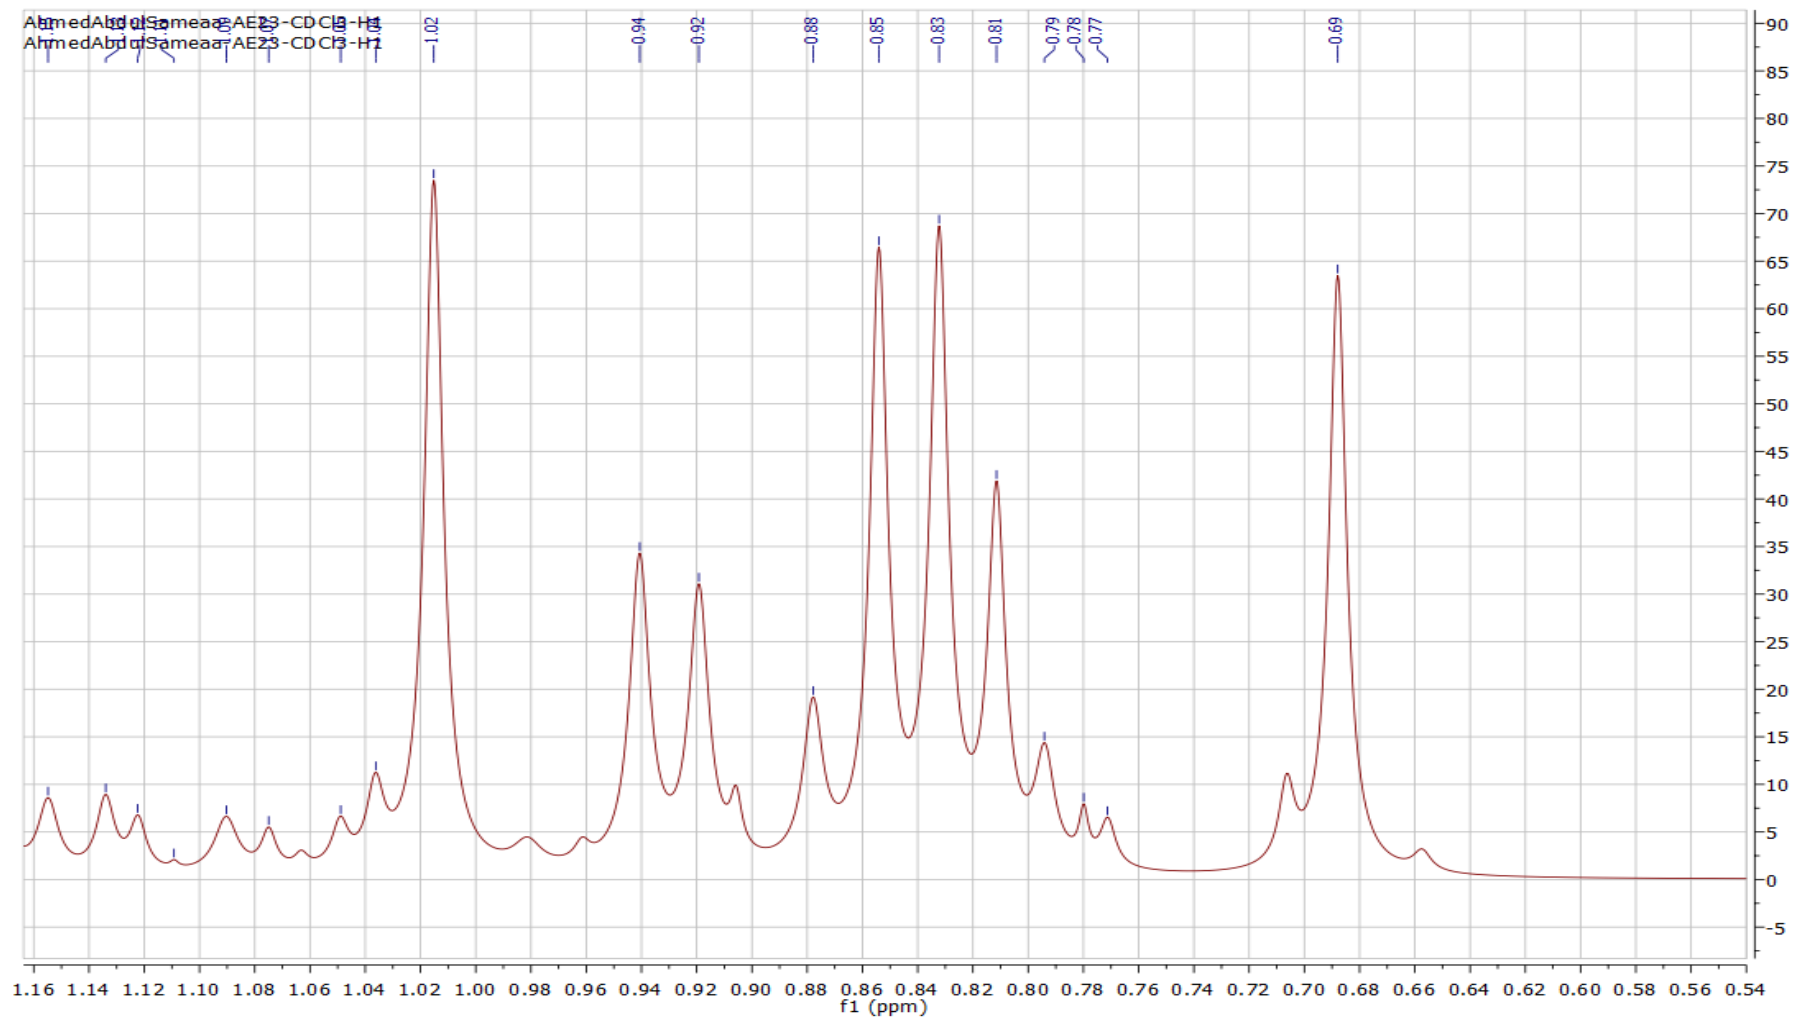

**Figure 58: Partial expansion of  $^1\text{H-NMR}$  spectrum of compound 10 (300 MHz,  $\text{CDCl}_3$ )**

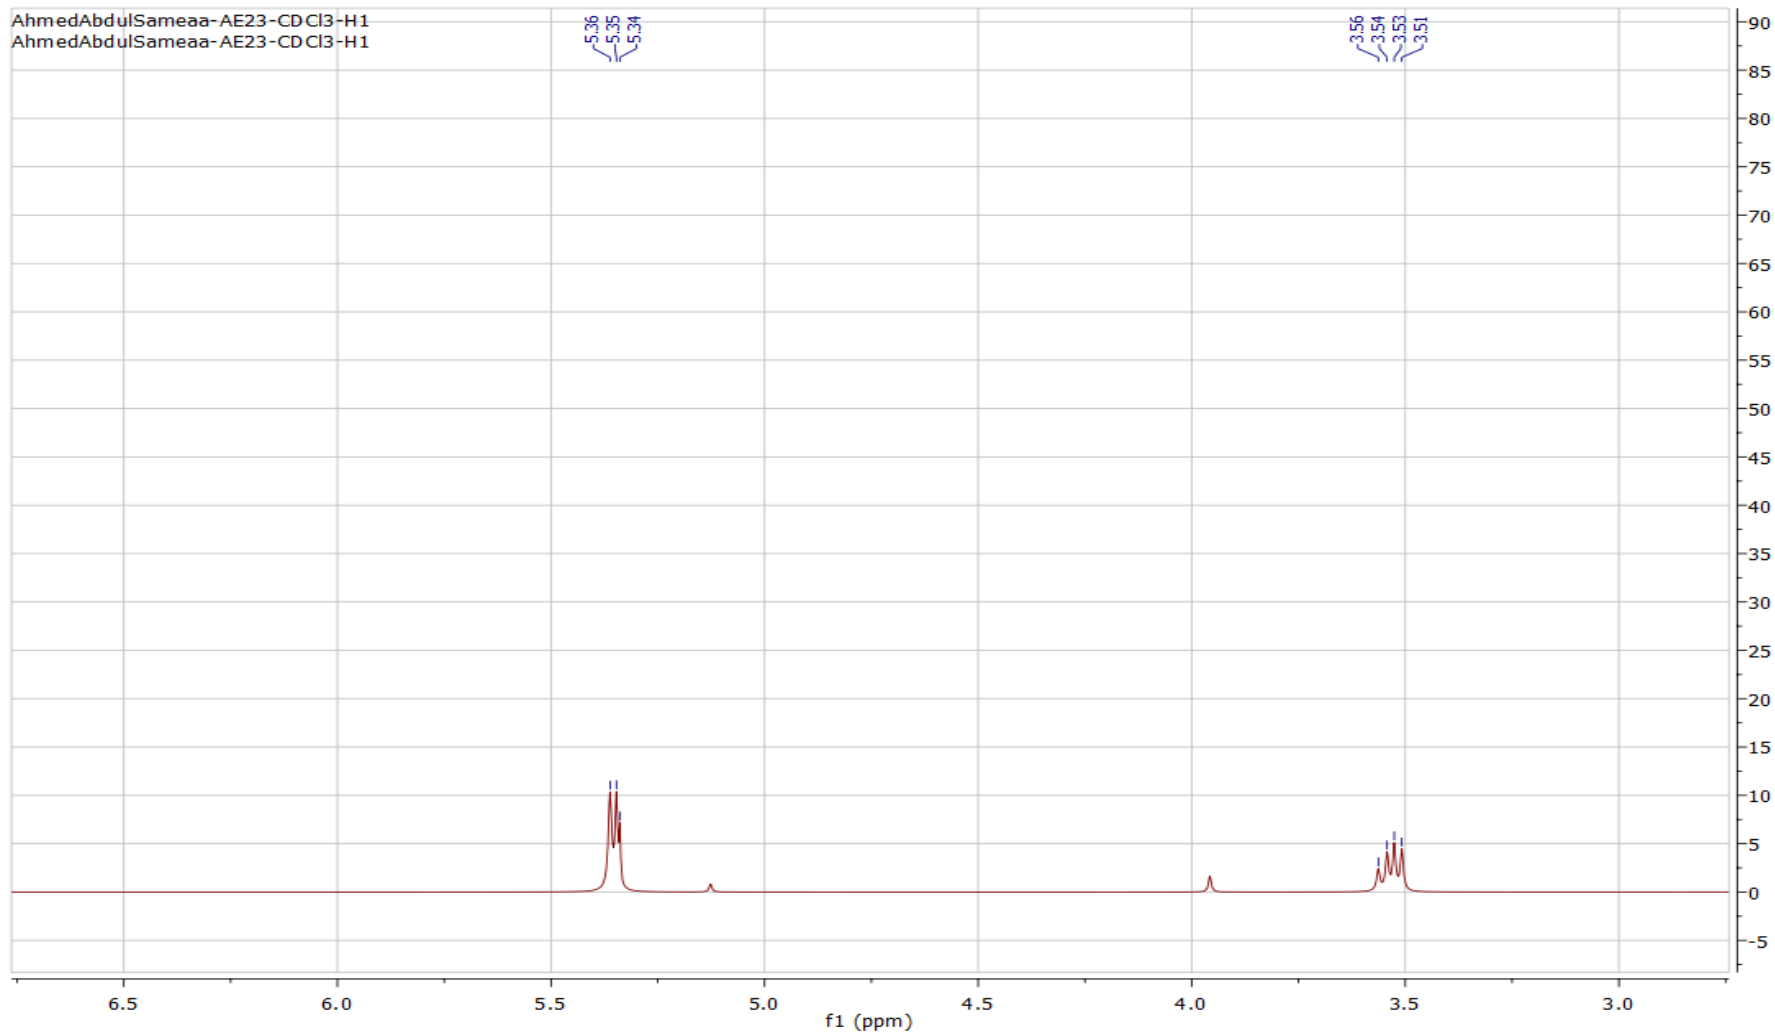

**Figure 59: Partial expansion of  $^1\text{H}$ -NMR spectrum of compound 10 (300 MHz,  $\text{CDCl}_3$ )**

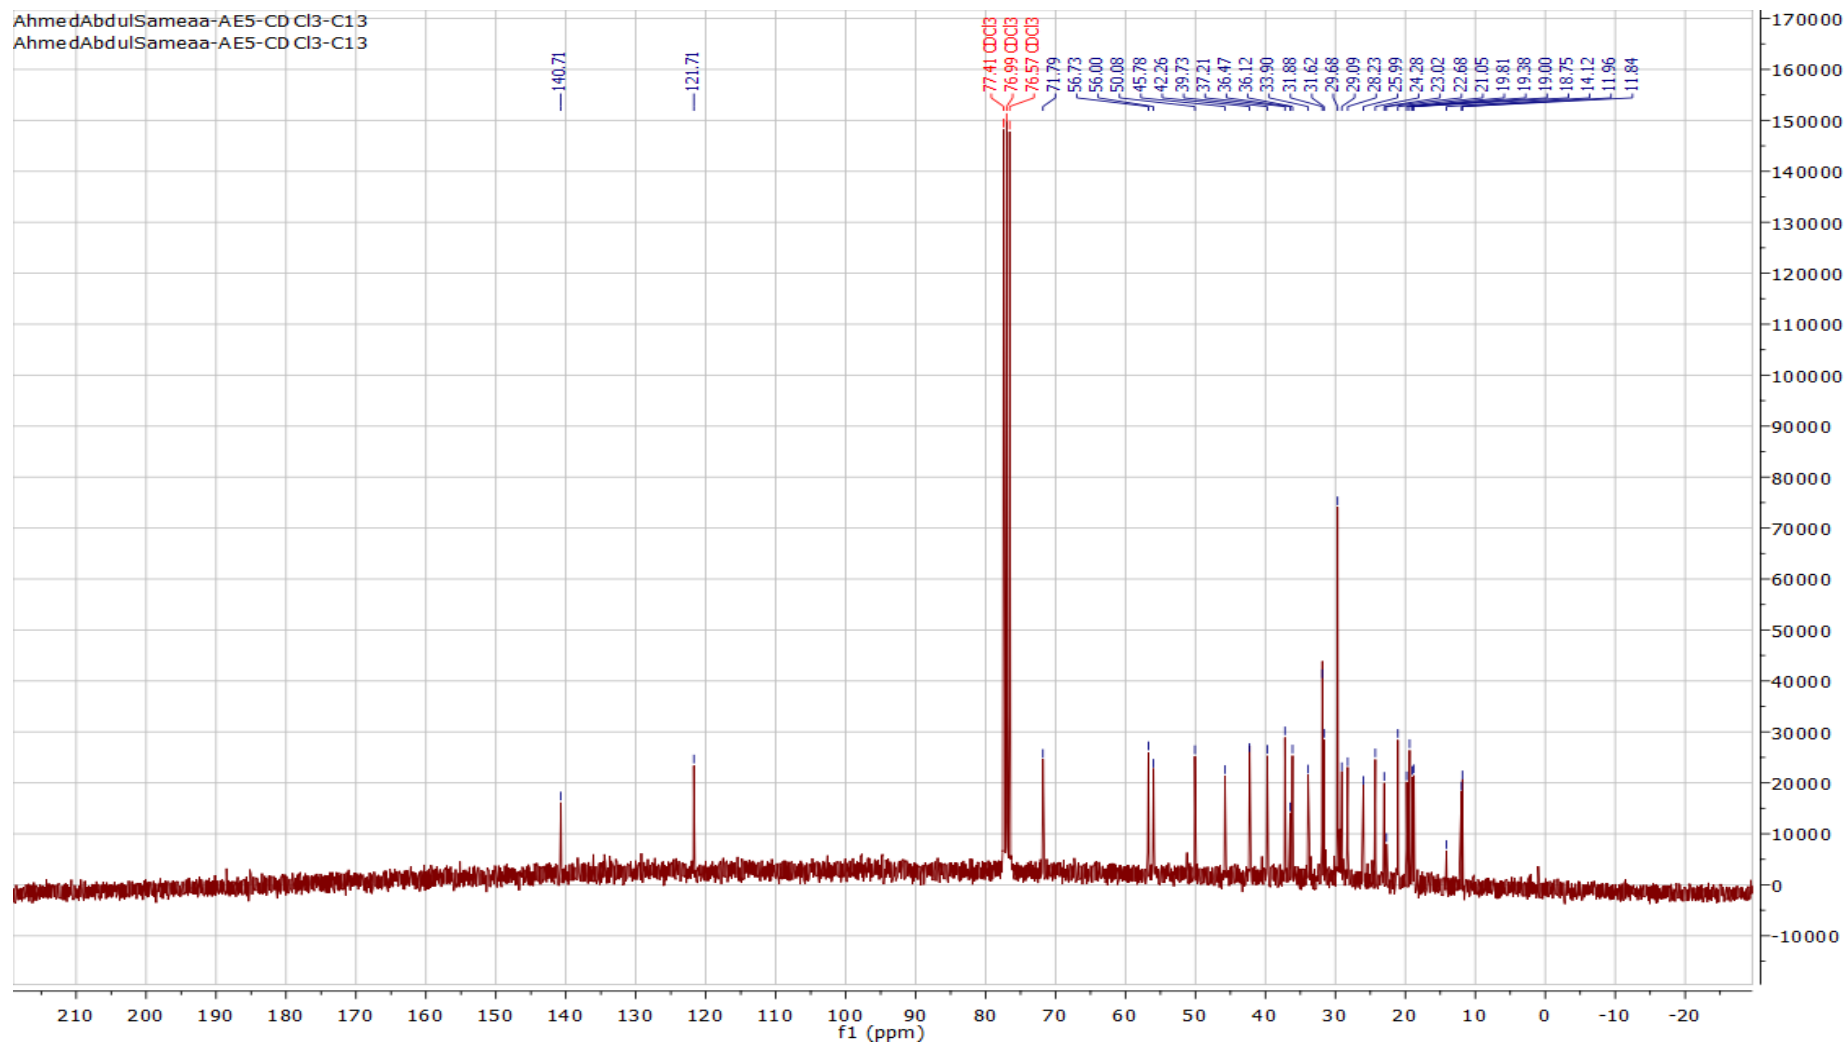

Figure 60:  $^{13}\text{C}$ -NMR spectrum of compound 10 (75 MHz,  $\text{CDCl}_3$ )
